# Supplementary material for: FOXQ1 promotes pancreatic cancer cell proliferation, tumor stemness, invasion and metastasis through regulation of LDHA-mediated aerobic glycolysis
Source: Research Square preprint supplement (doi:10.21203/rs.3.rs-3065885/v1), 2023-07-12
Supplement: Supplementary file 1 [file aa9f00503cbcdd84f80192a8.xlsx]

## Sheet: Sheet1
GeneID	GeneSymbol	Alias	Links	Cytoband	FullName	GeneType
90586	AOC4P	AOC4|UPAT	HGNC:HGNC:48869|Ensembl:ENSG00000260105	17q21.31	amine oxidase, copper containing 4, pseudogene	pseudo
503638	DUXAP9	LINC01296	HGNC:HGNC:32188	14q11.2	double homeobox A pseudogene 9	pseudo
391627	USP17L9P	RS447|USP17|USP17A|USP17H|USP17I|USP17J|USP17K|USP17L|USP17M	MIM:607011|HGNC:HGNC:12615|Ensembl:ENSG00000251694	4p16.1	ubiquitin specific peptidase 17-like family member 9, pseudogene	pseudo
388112	NANOGP8	NANOG|NANOGP1|PN8	HGNC:HGNC:23106	15q14	Nanog homeobox pseudogene 8	pseudo
7040	TGFB1	CED|DPD1|LAP|TGFB|TGFbeta	MIM:190180|HGNC:HGNC:11766|Ensembl:ENSG00000105329|Vega:OTTHUMG00000182760	19q13.2	transforming growth factor beta 1	protein-coding
6615	SNAI1	SLUGH2|SNA|SNAH|SNAIL|SNAIL1|dJ710H13.1	MIM:604238|HGNC:HGNC:11128|Ensembl:ENSG00000124216|Vega:OTTHUMG00000033048	20q13.13	snail family transcriptional repressor 1	protein-coding
6935	ZEB1	AREB6|BZP|DELTAEF1|FECD6|NIL2A|PPCD3|TCF8|ZFHEP|ZFHX1A	MIM:189909|HGNC:HGNC:11642|Ensembl:ENSG00000148516|Vega:OTTHUMG00000017907	10p11.22	zinc finger E-box binding homeobox 1	protein-coding
999	CDH1	Arc-1|CD324|CDHE|ECAD|LCAM|UVO	MIM:192090|HGNC:HGNC:1748|Ensembl:ENSG00000039068|Vega:OTTHUMG00000137561	16q22.1	cadherin 1	protein-coding
7291	TWIST1	ACS3|BPES2|BPES3|CRS|CRS1|CSO|SCS|TWIST|bHLHa38	MIM:601622|HGNC:HGNC:12428|Ensembl:ENSG00000122691|Vega:OTTHUMG00000090821	7p21.1	twist family bHLH transcription factor 1	protein-coding
1499	CTNNB1	CTNNB|EVR7|MRD19|armadillo	MIM:116806|HGNC:HGNC:2514|Ensembl:ENSG00000168036|Vega:OTTHUMG00000131393	3p22.1	catenin beta 1	protein-coding
6774	STAT3	ADMIO|ADMIO1|APRF|HIES	MIM:102582|HGNC:HGNC:11364|Ensembl:ENSG00000168610|Vega:OTTHUMG00000150645	17q21.2	signal transducer and activator of transcription 3	protein-coding
6591	SNAI2	SLUG|SLUGH|SLUGH1|SNAIL2|WS2D	MIM:602150|HGNC:HGNC:11094|Ensembl:ENSG00000019549|Vega:OTTHUMG00000149912	8q11.21	snail family transcriptional repressor 2	protein-coding
3091	HIF1A	HIF-1-alpha|HIF-1A|HIF-1alpha|HIF1|HIF1-ALPHA|MOP1|PASD8|bHLHe78	MIM:603348|HGNC:HGNC:4910|Ensembl:ENSG00000100644|Vega:OTTHUMG00000140344	14q23.2	hypoxia inducible factor 1 alpha subunit	protein-coding
207	AKT1	AKT|CWS6|PKB|PKB-ALPHA|PRKBA|RAC|RAC-ALPHA	MIM:164730|HGNC:HGNC:391|Ensembl:ENSG00000142208|Vega:OTTHUMG00000170795	14q32.33	AKT serine/threonine kinase 1	protein-coding
9839	ZEB2	HSPC082|SIP-1|SIP1|SMADIP1|ZFHX1B	MIM:605802|HGNC:HGNC:14881|Ensembl:ENSG00000169554|Vega:OTTHUMG00000187624	2q22.3	zinc finger E-box binding homeobox 2	protein-coding
4088	SMAD3	HSPC193|HsT17436|JV15-2|LDS1C|LDS3|MADH3	MIM:603109|HGNC:HGNC:6769|Ensembl:ENSG00000166949|Vega:OTTHUMG00000133230	15q22.33	SMAD family member 3	protein-coding
1956	EGFR	ERBB|ERBB1|HER1|NISBD2|PIG61|mENA	MIM:131550|HGNC:HGNC:3236|Ensembl:ENSG00000146648|Vega:OTTHUMG00000023661	7p11.2	epidermal growth factor receptor	protein-coding
4087	SMAD2	JV18|JV18-1|MADH2|MADR2|hMAD-2|hSMAD2	MIM:601366|HGNC:HGNC:6768|Ensembl:ENSG00000175387|Vega:OTTHUMG00000132652	18q21.1	SMAD family member 2	protein-coding
4851	NOTCH1	AOS5|AOVD1|TAN1|hN1	MIM:190198|HGNC:HGNC:7881|Ensembl:ENSG00000148400|Vega:OTTHUMG00000020935	9q34.3	notch 1	protein-coding
3611	ILK	HEL-S-28|ILK-1|ILK-2|P59|p59ILK	MIM:602366|HGNC:HGNC:6040|Ensembl:ENSG00000166333|Vega:OTTHUMG00000133407	11p15.4	integrin linked kinase	protein-coding
2932	GSK3B	-	MIM:605004|HGNC:HGNC:4617|Ensembl:ENSG00000082701|Vega:OTTHUMG00000133765	3q13.33	glycogen synthase kinase 3 beta	protein-coding
4790	NFKB1	CVID12|EBP-1|KBF1|NF-kB1|NF-kappa-B|NF-kappaB|NFKB-p105|NFKB-p50|NFkappaB|p105|p50	MIM:164011|HGNC:HGNC:7794|Ensembl:ENSG00000109320|Vega:OTTHUMG00000161080	4q24	nuclear factor kappa B subunit 1	protein-coding
3569	IL6	BSF-2|BSF2|CDF|HGF|HSF|IFN-beta-2|IFNB2|IL-6	MIM:147620|HGNC:HGNC:6018|Ensembl:ENSG00000136244|Vega:OTTHUMG00000023178	7p15.3	interleukin 6	protein-coding
8091	HMGA2	BABL|HMGI-C|HMGIC|LIPO|STQTL9	MIM:600698|HGNC:HGNC:5009|Ensembl:ENSG00000149948|Vega:OTTHUMG00000168936	12q14.3	high mobility group AT-hook 2	protein-coding
7852	CXCR4	CD184|D2S201E|FB22|HM89|HSY3RR|LAP-3|LAP3|LCR1|LESTR|NPY3R|NPYR|NPYRL|NPYY3R|WHIM|WHIMS	MIM:162643|HGNC:HGNC:2561|Ensembl:ENSG00000121966|Vega:OTTHUMG00000153583	2q22.1	C-X-C motif chemokine receptor 4	protein-coding
7157	TP53	BCC7|LFS1|P53|TRP53	MIM:191170|HGNC:HGNC:11998|Ensembl:ENSG00000141510|Vega:OTTHUMG00000162125	17p13.1	tumor protein p53	protein-coding
1950	EGF	HOMG4|URG	MIM:131530|HGNC:HGNC:3229|Ensembl:ENSG00000138798|Vega:OTTHUMG00000132044	4q25	epidermal growth factor	protein-coding
92140	MTDH	3D3|AEG-1|AEG1|LYRIC|LYRIC/3D3	MIM:610323|HGNC:HGNC:29608|Ensembl:ENSG00000147649|Vega:OTTHUMG00000164692	8q22.1	metadherin	protein-coding
5594	MAPK1	ERK|ERK-2|ERK2|ERT1|MAPK2|P42MAPK|PRKM1|PRKM2|p38|p40|p41|p41mapk|p42-MAPK	MIM:176948|HGNC:HGNC:6871|Ensembl:ENSG00000100030|Vega:OTTHUMG00000030508	22q11.22	mitogen-activated protein kinase 1	protein-coding
960	CD44	CDW44|CSPG8|ECMR-III|HCELL|HUTCH-I|IN|LHR|MC56|MDU2|MDU3|MIC4|Pgp1	MIM:107269|HGNC:HGNC:1681|Ensembl:ENSG00000026508|Vega:OTTHUMG00000044388	11p13	CD44 molecule (Indian blood group)	protein-coding
648	BMI1	FLVI2/BMI1|PCGF4|RNF51|flvi-2/bmi-1	MIM:164831|HGNC:HGNC:1066|Ensembl:ENSG00000168283|Vega:OTTHUMG00000017807	10p12.2	BMI1 proto-oncogene, polycomb ring finger	protein-coding
5728	PTEN	10q23del|BZS|CWS1|DEC|GLM2|MHAM|MMAC1|PTEN1|PTENbeta|TEP1	MIM:601728|HGNC:HGNC:9588|Ensembl:ENSG00000171862|Vega:OTTHUMG00000018688	10q23.31	phosphatase and tensin homolog	protein-coding
2475	MTOR	FRAP|FRAP1|FRAP2|RAFT1|RAPT1|SKS	MIM:601231|HGNC:HGNC:3942|Ensembl:ENSG00000198793|Vega:OTTHUMG00000002001	1p36.22	mechanistic target of rapamycin	protein-coding
7431	VIM	CTRCT30|HEL113	MIM:193060|HGNC:HGNC:12692|Ensembl:ENSG00000026025|Vega:OTTHUMG00000017744	10p13	vimentin	protein-coding
5879	RAC1	MIG5|Rac-1|TC-25|p21-Rac1	MIM:602048|HGNC:HGNC:9801|Ensembl:ENSG00000136238|Vega:OTTHUMG00000023540	7p22.1	ras-related C3 botulinum toxin substrate 1 (rho family, small GTP binding protein Rac1)	protein-coding
4318	MMP9	CLG4B|GELB|MANDP2|MMP-9	MIM:120361|HGNC:HGNC:7176|Ensembl:ENSG00000100985|Vega:OTTHUMG00000033044	20q13.12	matrix metallopeptidase 9	protein-coding
4313	MMP2	CLG4|CLG4A|MMP-2|MMP-II|MONA|TBE-1	MIM:120360|HGNC:HGNC:7166|Ensembl:ENSG00000087245|Vega:OTTHUMG00000133202	16q12.2	matrix metallopeptidase 2	protein-coding
2735	GLI1	GLI	MIM:165220|HGNC:HGNC:4317|Ensembl:ENSG00000111087|Vega:OTTHUMG00000167332	12q13.3	GLI family zinc finger 1	protein-coding
4233	MET	AUTS9|DFNB97|HGFR|RCCP2|c-Met	MIM:164860|HGNC:HGNC:7029|Ensembl:ENSG00000105976|Vega:OTTHUMG00000023299	7q31.2	MET proto-oncogene, receptor tyrosine kinase	protein-coding
4089	SMAD4	DPC4|JIP|MADH4|MYHRS	MIM:600993|HGNC:HGNC:6770|Ensembl:ENSG00000141646|Vega:OTTHUMG00000132696	18q21.2	SMAD family member 4	protein-coding
9314	KLF4	EZF|GKLF	MIM:602253|HGNC:HGNC:6348|Ensembl:ENSG00000136826|Vega:OTTHUMG00000020449	9q31.2	Kruppel like factor 4	protein-coding
7474	WNT5A	hWNT5A	MIM:164975|HGNC:HGNC:12784|Ensembl:ENSG00000114251|Vega:OTTHUMG00000158361	3p14.3	Wnt family member 5A	protein-coding
4609	MYC	MRTL|MYCC|bHLHe39|c-Myc	MIM:190080|HGNC:HGNC:7553|Ensembl:ENSG00000136997|Vega:OTTHUMG00000128475	8q24.21	MYC proto-oncogene, bHLH transcription factor	protein-coding
4092	SMAD7	CRCS3|MADH7|MADH8	MIM:602932|HGNC:HGNC:6773|Ensembl:ENSG00000101665|Vega:OTTHUMG00000132655	18q21.1	SMAD family member 7	protein-coding
23411	SIRT1	SIR2|SIR2L1|SIR2alpha	MIM:604479|HGNC:HGNC:14929|Ensembl:ENSG00000096717|Vega:OTTHUMG00000018340	10q21.3	sirtuin 1	protein-coding
1490	CTGF	CCN2|HCS24|IGFBP8|NOV2	MIM:121009|HGNC:HGNC:2500|Ensembl:ENSG00000118523|Vega:OTTHUMG00000015573	6q23.2	connective tissue growth factor	protein-coding
1236	CCR7	BLR2|CC-CKR-7|CCR-7|CD197|CDw197|CMKBR7|EBI1	MIM:600242|HGNC:HGNC:1608|Ensembl:ENSG00000126353|Vega:OTTHUMG00000133375	17q21.2	C-C motif chemokine receptor 7	protein-coding
8842	PROM1	AC133|CD133|CORD12|MCDR2|MSTP061|PROML1|RP41|STGD4	MIM:604365|HGNC:HGNC:9454|Ensembl:ENSG00000007062|Vega:OTTHUMG00000160180	4p15.32	prominin 1	protein-coding
7042	TGFB2	G-TSF|LDS4|TGF-beta2	MIM:190220|HGNC:HGNC:11768|Ensembl:ENSG00000092969|Vega:OTTHUMG00000039521	1q41	transforming growth factor beta 2	protein-coding
5290	PIK3CA	CLOVE|CWS5|MCAP|MCM|MCMTC|PI3K|PI3K-alpha|p110-alpha	MIM:171834|HGNC:HGNC:8975|Ensembl:ENSG00000121879|Vega:OTTHUMG00000157311	3q26.32	phosphatidylinositol-4,5-bisphosphate 3-kinase catalytic subunit alpha	protein-coding
387	RHOA	ARH12|ARHA|RHO12|RHOH12	MIM:165390|HGNC:HGNC:667|Ensembl:ENSG00000067560|Vega:OTTHUMG00000156838	3p21.31	ras homolog family member A	protein-coding
367	AR	AIS|AR8|DHTR|HUMARA|HYSP1|KD|NR3C4|SBMA|SMAX1|TFM	MIM:313700|HGNC:HGNC:644|Ensembl:ENSG00000169083|Vega:OTTHUMG00000021740	Xq12	androgen receptor	protein-coding
29126	CD274	B7-H|B7H1|PD-L1|PDCD1L1|PDCD1LG1|PDL1	MIM:605402|HGNC:HGNC:17635|Ensembl:ENSG00000120217|Vega:OTTHUMG00000019503	9p24.1	CD274 molecule	protein-coding
2305	FOXM1	FKHL16|FOXM1B|HFH-11|HFH11|HNF-3|INS-1|MPHOSPH2|MPP-2|MPP2|PIG29|TRIDENT	MIM:602341|HGNC:HGNC:3818|Ensembl:ENSG00000111206|Vega:OTTHUMG00000168118	12p13.33	forkhead box M1	protein-coding
10413	YAP1	COB1|YAP|YAP2|YAP65|YKI	MIM:606608|HGNC:HGNC:16262|Ensembl:ENSG00000137693|Vega:OTTHUMG00000167322	11q22.1	Yes associated protein 1	protein-coding
6714	SRC	ASV|SRC1|THC6|c-SRC|p60-Src	MIM:190090|HGNC:HGNC:11283|Ensembl:ENSG00000197122|Vega:OTTHUMG00000032417	20q11.23	SRC proto-oncogene, non-receptor tyrosine kinase	protein-coding
3717	JAK2	JTK10|THCYT3	MIM:147796|HGNC:HGNC:6192|Ensembl:ENSG00000096968|Vega:OTTHUMG00000019490	9p24.1	Janus kinase 2	protein-coding
25937	WWTR1	TAZ	MIM:607392|HGNC:HGNC:24042|Ensembl:ENSG00000018408|Vega:OTTHUMG00000159614	3q25.1	WW domain containing transcription regulator 1	protein-coding
1000	CDH2	CD325|CDHN|CDw325|NCAD	MIM:114020|HGNC:HGNC:1759|Ensembl:ENSG00000170558|Vega:OTTHUMG00000059940	18q12.1	cadherin 2	protein-coding
7124	TNF	DIF|TNF-alpha|TNFA|TNFSF2|TNLG1F	MIM:191160|HGNC:HGNC:11892|Ensembl:ENSG00000232810|Vega:OTTHUMG00000031194	6p21.33	tumor necrosis factor	protein-coding
6387	CXCL12	IRH|PBSF|SCYB12|SDF1|TLSF|TPAR1	MIM:600835|HGNC:HGNC:10672|Ensembl:ENSG00000107562|Vega:OTTHUMG00000018054	10q11.21	C-X-C motif chemokine ligand 12	protein-coding
5970	RELA	NFKB3|p65	MIM:164014|HGNC:HGNC:9955|Ensembl:ENSG00000173039|Vega:OTTHUMG00000166566	11q13.1	RELA proto-oncogene, NF-kB subunit	protein-coding
5595	MAPK3	ERK-1|ERK1|ERT2|HS44KDAP|HUMKER1A|P44ERK1|P44MAPK|PRKM3|p44-ERK1|p44-MAPK	MIM:601795|HGNC:HGNC:6877|Ensembl:ENSG00000102882|Vega:OTTHUMG00000132149	16p11.2	mitogen-activated protein kinase 3	protein-coding
3576	CXCL8	GCP-1|GCP1|IL8|LECT|LUCT|LYNAP|MDNCF|MONAP|NAF|NAP-1|NAP1	MIM:146930|HGNC:HGNC:6025|Ensembl:ENSG00000169429|Vega:OTTHUMG00000151316	4q13.3	C-X-C motif chemokine ligand 8	protein-coding
3082	HGF	DFNB39|F-TCF|HGFB|HPTA|SF	MIM:142409|HGNC:HGNC:4893|Ensembl:ENSG00000019991|Vega:OTTHUMG00000023804	7q21.11	hepatocyte growth factor	protein-coding
2335	FN1	CIG|ED-B|FINC|FN|FNZ|GFND|GFND2|LETS|MSF	MIM:135600|HGNC:HGNC:3778|Ensembl:ENSG00000115414|Vega:OTTHUMG00000133054	2q35	fibronectin 1	protein-coding
117581	TWIST2	AMS|BBRSAY|DERMO1|FFDD3|SETLSS|bHLHa39	MIM:607556|HGNC:HGNC:20670|Ensembl:ENSG00000233608|Vega:OTTHUMG00000152836	2q37.3	twist family bHLH transcription factor 2	protein-coding
8626	TP63	AIS|B(p51A)|B(p51B)|EEC3|KET|LMS|NBP|OFC8|RHS|SHFM4|TP53CP|TP53L|TP73L|p40|p51|p53CP|p63|p73H|p73L	MIM:603273|HGNC:HGNC:15979|Ensembl:ENSG00000073282|Vega:OTTHUMG00000156313	3q28	tumor protein p63	protein-coding
79923	NANOG	-	MIM:607937|HGNC:HGNC:20857|Ensembl:ENSG00000111704|Vega:OTTHUMG00000166019	12p13.31	Nanog homeobox	protein-coding
7422	VEGFA	MVCD1|VEGF|VPF	MIM:192240|HGNC:HGNC:12680|Ensembl:ENSG00000112715|Vega:OTTHUMG00000014745	6p21.1	vascular endothelial growth factor A	protein-coding
6667	SP1	-	MIM:189906|HGNC:HGNC:11205|Ensembl:ENSG00000185591|Vega:OTTHUMG00000170047	12q13.13	Sp1 transcription factor	protein-coding
6275	S100A4	18A2|42A|CAPL|FSP1|MTS1|P9KA|PEL98	MIM:114210|HGNC:HGNC:10494|Ensembl:ENSG00000196154|Vega:OTTHUMG00000013546	1q21.3	S100 calcium binding protein A4	protein-coding
5747	PTK2	FADK|FAK|FAK1|FRNK|PPP1R71|p125FAK|pp125FAK	MIM:600758|HGNC:HGNC:9611|Ensembl:ENSG00000169398|Vega:OTTHUMG00000067438	8q24.3	protein tyrosine kinase 2	protein-coding
5598	MAPK7	BMK1|ERK4|ERK5|PRKM7	MIM:602521|HGNC:HGNC:6880|Ensembl:ENSG00000166484|Vega:OTTHUMG00000059587	17p11.2	mitogen-activated protein kinase 7	protein-coding
4582	MUC1	ADMCKD|ADMCKD1|CA 15-3|CD227|EMA|H23AG|KL-6|MAM6|MCD|MCKD|MCKD1|MUC-1|MUC-1/SEC|MUC-1/X|MUC1/ZD|PEM|PEMT|PUM	MIM:158340|HGNC:HGNC:7508|Ensembl:ENSG00000185499|Vega:OTTHUMG00000035681	1q22	mucin 1, cell surface associated	protein-coding
3146	HMGB1	HMG-1|HMG1|HMG3|SBP-1	MIM:163905|HGNC:HGNC:4983|Ensembl:ENSG00000189403|Vega:OTTHUMG00000016670	13q12.3	high mobility group box 1	protein-coding
2146	EZH2	ENX-1|ENX1|EZH2b|KMT6|KMT6A|WVS|WVS2	MIM:601573|HGNC:HGNC:3527|Ensembl:ENSG00000106462|Vega:OTTHUMG00000158973	7q36.1	enhancer of zeste 2 polycomb repressive complex 2 subunit	protein-coding
2099	ESR1	ER|ESR|ESRA|ESTRR|Era|NR3A1	MIM:133430|HGNC:HGNC:3467|Ensembl:ENSG00000091831|Vega:OTTHUMG00000016103	6q25.1-q25.2	estrogen receptor 1	protein-coding
857	CAV1	BSCL3|CGL3|LCCNS|MSTP085|PPH3|VIP21	MIM:601047|HGNC:HGNC:1527|Ensembl:ENSG00000105974|Vega:OTTHUMG00000023413	7q31.2	caveolin 1	protein-coding
6657	SOX2	ANOP3|MCOPS3	MIM:184429|HGNC:HGNC:11195|Ensembl:ENSG00000181449|Vega:OTTHUMG00000158222	3q26.33	SRY-box 2	protein-coding
655	BMP7	OP-1	MIM:112267|HGNC:HGNC:1074|Ensembl:ENSG00000101144|Vega:OTTHUMG00000032812	20q13.31	bone morphogenetic protein 7	protein-coding
652	BMP4	BMP2B|BMP2B1|MCOPS6|OFC11|ZYME	MIM:112262|HGNC:HGNC:1071|Ensembl:ENSG00000125378|Vega:OTTHUMG00000140303	14q22.2	bone morphogenetic protein 4	protein-coding
6469	SHH	HHG1|HLP3|HPE3|MCOPCB5|SMMCI|TPT|TPTPS	MIM:600725|HGNC:HGNC:10848|Ensembl:ENSG00000164690|Vega:OTTHUMG00000151349	7q36.3	sonic hedgehog	protein-coding
5743	PTGS2	COX-2|COX2|GRIPGHS|PGG/HS|PGHS-2|PHS-2|hCox-2	MIM:600262|HGNC:HGNC:9605|Ensembl:ENSG00000073756|Vega:OTTHUMG00000035473	1q31.1	prostaglandin-endoperoxide synthase 2	protein-coding
5460	POU5F1	OCT3|OCT4|OTF-3|OTF3|OTF4|Oct-3|Oct-4	MIM:164177|HGNC:HGNC:9221|Ensembl:ENSG00000204531|Vega:OTTHUMG00000031206	6p21.33	POU class 5 homeobox 1	protein-coding
5396	PRRX1	AGOTC|PHOX1|PMX1|PRX-1|PRX1	MIM:167420|HGNC:HGNC:9142|Ensembl:ENSG00000116132|Vega:OTTHUMG00000035231	1q24.2	paired related homeobox 1	protein-coding
3845	KRAS	C-K-RAS|CFC2|K-RAS2A|K-RAS2B|K-RAS4A|K-RAS4B|KI-RAS|KRAS1|KRAS2|NS|NS3|RALD|RASK2|c-Ki-ras2	MIM:190070|HGNC:HGNC:6407|Ensembl:ENSG00000133703|Vega:OTTHUMG00000171193	12p12.1	KRAS proto-oncogene, GTPase	protein-coding
3397	ID1	ID|bHLHb24	MIM:600349|HGNC:HGNC:5360|Ensembl:ENSG00000125968|Vega:OTTHUMG00000032181	20q11.21	inhibitor of DNA binding 1, HLH protein	protein-coding
2260	FGFR1	BFGFR|CD331|CEK|ECCL|FGFBR|FGFR-1|FLG|FLT-2|FLT2|HBGFR|HH2|HRTFDS|KAL2|N-SAM|OGD|bFGF-R-1	MIM:136350|HGNC:HGNC:3688|Ensembl:ENSG00000077782|Vega:OTTHUMG00000147366	8p11.23	fibroblast growth factor receptor 1	protein-coding
10631	POSTN	OSF-2|OSF2|PDLPOSTN|PN	MIM:608777|HGNC:HGNC:16953|Ensembl:ENSG00000133110|Vega:OTTHUMG00000016751	13q13.3	periostin	protein-coding
94234	FOXQ1	HFH1	MIM:612788|HGNC:HGNC:20951|Ensembl:ENSG00000164379|Vega:OTTHUMG00000016160	6p25.3	forkhead box Q1	protein-coding
9112	MTA1	-	MIM:603526|HGNC:HGNC:7410|Ensembl:ENSG00000182979|Vega:OTTHUMG00000150362	14q32.33	metastasis associated 1	protein-coding
79977	GRHL2	BOM|DFNA28|ECTDS|TFCP2L3	MIM:608576|HGNC:HGNC:2799|Ensembl:ENSG00000083307|Vega:OTTHUMG00000149915	8q22.3	grainyhead like transcription factor 2	protein-coding
7227	TRPS1	GC79|LGCR	MIM:604386|HGNC:HGNC:12340|Ensembl:ENSG00000104447|Vega:OTTHUMG00000142829	8q23.3	transcriptional repressor GATA binding 1	protein-coding
6868	ADAM17	ADAM18|CD156B|CSVP|NISBD|NISBD1|TACE	MIM:603639|HGNC:HGNC:195|Ensembl:ENSG00000151694|Vega:OTTHUMG00000090425	2p25.1	ADAM metallopeptidase domain 17	protein-coding
6862	T	SAVA|TFT	MIM:601397|HGNC:HGNC:11515|Ensembl:ENSG00000164458|Vega:OTTHUMG00000015991	6q27	T brachyury transcription factor	protein-coding
6790	AURKA	AIK|ARK1|AURA|BTAK|PPP1R47|STK15|STK6|STK7	MIM:603072|HGNC:HGNC:11393|Ensembl:ENSG00000087586|Vega:OTTHUMG00000032796	20q13.2	aurora kinase A	protein-coding
650	BMP2	BDA2|BMP2A	MIM:112261|HGNC:HGNC:1069|Ensembl:ENSG00000125845|Vega:OTTHUMG00000031833	20p12.3	bone morphogenetic protein 2	protein-coding
6362	CCL18	AMAC-1|AMAC1|CKb7|DC-CK1|DCCK1|MIP-4|PARC|SCYA18	MIM:603757|HGNC:HGNC:10616|Ensembl:ENSG00000275385|Vega:OTTHUMG00000188410	17q12	C-C motif chemokine ligand 18	protein-coding
6347	CCL2	GDCF-2|HC11|HSMCR30|MCAF|MCP-1|MCP1|SCYA2|SMC-CF	MIM:158105|HGNC:HGNC:10618|Ensembl:ENSG00000108691|Vega:OTTHUMG00000132887	17q12	C-C motif chemokine ligand 2	protein-coding
6093	ROCK1	P160ROCK|ROCK-I	MIM:601702|HGNC:HGNC:10251|Ensembl:ENSG00000067900|Vega:OTTHUMG00000131723	18q11.1	Rho associated coiled-coil containing protein kinase 1	protein-coding
54845	ESRP1	RBM35A|RMB35A	MIM:612959|HGNC:HGNC:25966|Ensembl:ENSG00000104413|Vega:OTTHUMG00000164587	8q22.1	epithelial splicing regulatory protein 1	protein-coding
5468	PPARG	CIMT1|GLM1|NR1C3|PPARG1|PPARG2|PPARgamma	MIM:601487|HGNC:HGNC:9236|Ensembl:ENSG00000132170|Vega:OTTHUMG00000129764	3p25.2	peroxisome proliferator activated receptor gamma	protein-coding
4915	NTRK2	GP145-TrkB|OBHD|TRKB|trk-B	MIM:600456|HGNC:HGNC:8032|Ensembl:ENSG00000148053|Vega:OTTHUMG00000020120	9q21.33	neurotrophic receptor tyrosine kinase 2	protein-coding
4072	EPCAM	DIAR5|EGP-2|EGP314|EGP40|ESA|HNPCC8|KS1/4|KSA|M4S1|MIC18|MK-1|TACSTD1|TROP1	MIM:185535|HGNC:HGNC:11529|Ensembl:ENSG00000119888|Vega:OTTHUMG00000128853	2p21	epithelial cell adhesion molecule	protein-coding
4017	LOXL2	LOR|LOR2|WS9-14	MIM:606663|HGNC:HGNC:6666|Ensembl:ENSG00000134013|Vega:OTTHUMG00000163797	8p21.3	lysyl oxidase like 2	protein-coding
3956	LGALS1	GAL1|GBP	MIM:150570|HGNC:HGNC:6561|Ensembl:ENSG00000100097|Vega:OTTHUMG00000150661	22q13.1	galectin 1	protein-coding
3725	JUN	AP-1|AP1|c-Jun|p39	MIM:165160|HGNC:HGNC:6204|Ensembl:ENSG00000177606|Vega:OTTHUMG00000008376	1p32.1	Jun proto-oncogene, AP-1 transcription factor subunit	protein-coding
3688	ITGB1	CD29|FNRB|GPIIA|MDF2|MSK12|VLA-BETA|VLAB	MIM:135630|HGNC:HGNC:6153|Ensembl:ENSG00000150093|Vega:OTTHUMG00000017928	10p11.22	integrin subunit beta 1	protein-coding
3065	HDAC1	GON-10|HD1|RPD3|RPD3L1	MIM:601241|HGNC:HGNC:4852|Ensembl:ENSG00000116478|Vega:OTTHUMG00000007529	1p35.2-p35.1	histone deacetylase 1	protein-coding
26585	GREM1	C15DUPq|CKTSF1B1|CRAC1|CRCS4|DAND2|DRM|DUP15q|GREMLIN|HMPS|HMPS1|IHG-2|MPSH|PIG2	MIM:603054|HGNC:HGNC:2001|Ensembl:ENSG00000166923|Vega:OTTHUMG00000129319	15q13.3	gremlin 1, DAN family BMP antagonist	protein-coding
23028	KDM1A	AOF2|BHC110|CPRF|KDM1|LSD1	MIM:609132|HGNC:HGNC:29079|Ensembl:ENSG00000004487|Vega:OTTHUMG00000003220	1p36.12	lysine demethylase 1A	protein-coding
177	AGER	RAGE|SCARJ1	MIM:600214|HGNC:HGNC:320|Ensembl:ENSG00000204305|Vega:OTTHUMG00000031120	6p21.32	advanced glycosylation end-product specific receptor	protein-coding
8650	NUMB	C14orf41|S171|c14_5527	MIM:603728|HGNC:HGNC:8060|Ensembl:ENSG00000133961|Vega:OTTHUMG00000171436	14q24.2-q24.3	NUMB, endocytic adaptor protein	protein-coding
7471	WNT1	BMND16|INT1|OI15	MIM:164820|HGNC:HGNC:12774|Ensembl:ENSG00000125084|Vega:OTTHUMG00000170403	12q13.12	Wnt family member 1	protein-coding
7430	EZR	CVIL|CVL|HEL-S-105|VIL2	MIM:123900|HGNC:HGNC:12691|Ensembl:ENSG00000092820|Vega:OTTHUMG00000015917	6q25.3	ezrin	protein-coding
7099	TLR4	ARMD10|CD284|TLR-4|TOLL	MIM:603030|HGNC:HGNC:11850|Ensembl:ENSG00000136869|Vega:OTTHUMG00000021046	9q33.1	toll like receptor 4	protein-coding
6929	TCF3	AGM8|E2A|E47|ITF1|TCF-3|VDIR|bHLHb21	MIM:147141|HGNC:HGNC:11633|Ensembl:ENSG00000071564|Vega:OTTHUMG00000180031	19p13.3	transcription factor 3	protein-coding
6794	STK11	LKB1|PJS|hLKB1	MIM:602216|HGNC:HGNC:11389|Ensembl:ENSG00000118046|Vega:OTTHUMG00000180118	19p13.3	serine/threonine kinase 11	protein-coding
6366	CCL21	6Ckine|CKb9|ECL|SCYA21|SLC|TCA4	MIM:602737|HGNC:HGNC:10620|Ensembl:ENSG00000137077|Vega:OTTHUMG00000019838	9p13.3	C-C motif chemokine ligand 21	protein-coding
6364	CCL20	CKb4|Exodus|LARC|MIP-3-alpha|MIP-3a|MIP3A|SCYA20|ST38	MIM:601960|HGNC:HGNC:10619|Ensembl:ENSG00000115009|Vega:OTTHUMG00000133189	2q36.3	C-C motif chemokine ligand 20	protein-coding
51176	LEF1	LEF-1|TCF10|TCF1ALPHA|TCF7L3	MIM:153245|HGNC:HGNC:6551|Ensembl:ENSG00000138795|Vega:OTTHUMG00000131809	4q25	lymphoid enhancer binding factor 1	protein-coding
5076	PAX2	FSGS7|PAPRS	MIM:167409|HGNC:HGNC:8616|Ensembl:ENSG00000075891|Vega:OTTHUMG00000018913	10q24.31	paired box 2	protein-coding
4921	DDR2	MIG20a|NTRKR3|TKT|TYRO10	MIM:191311|HGNC:HGNC:2731|Ensembl:ENSG00000162733|Vega:OTTHUMG00000034423	1q23.3	discoidin domain receptor tyrosine kinase 2	protein-coding
4904	YBX1	BP-8|CBF-A|CSDA2|CSDB|DBPB|EFI-A|MDR-NF1|NSEP-1|NSEP1|YB-1|YB1	MIM:154030|HGNC:HGNC:8014|Ensembl:ENSG00000065978|Vega:OTTHUMG00000007523	1p34.2	Y-box binding protein 1	protein-coding
4162	MCAM	CD146|MUC18	MIM:155735|HGNC:HGNC:6934|Ensembl:ENSG00000076706|Vega:OTTHUMG00000166197	11q23.3	melanoma cell adhesion molecule	protein-coding
4015	LOX	AAT10	MIM:153455|HGNC:HGNC:6664|Ensembl:ENSG00000113083|Vega:OTTHUMG00000128914	5q23.1	lysyl oxidase	protein-coding
3934	LCN2	24p3|MSFI|NGAL|p25	MIM:600181|HGNC:HGNC:6526|Ensembl:ENSG00000148346|Vega:OTTHUMG00000020734	9q34.11	lipocalin 2	protein-coding
3605	IL17A	CTLA-8|CTLA8|IL-17|IL-17A|IL17	MIM:603149|HGNC:HGNC:5981|Ensembl:ENSG00000112115|Vega:OTTHUMG00000014840	6p12.2	interleukin 17A	protein-coding
3553	IL1B	IL-1|IL1-BETA|IL1F2	MIM:147720|HGNC:HGNC:5992|Ensembl:ENSG00000125538|Vega:OTTHUMG00000131344	2q14.1	interleukin 1 beta	protein-coding
3480	IGF1R	CD221|IGFIR|IGFR|JTK13	MIM:147370|HGNC:HGNC:5465|Ensembl:ENSG00000140443|Vega:OTTHUMG00000149851	15q26.3	insulin like growth factor 1 receptor	protein-coding
3479	IGF1	IGF-I|IGFI|MGF	MIM:147440|HGNC:HGNC:5464|Ensembl:ENSG00000017427|Vega:OTTHUMG00000149910	12q23.2	insulin like growth factor 1	protein-coding
3297	HSF1	HSTF1	MIM:140580|HGNC:HGNC:5224|Ensembl:ENSG00000185122|Vega:OTTHUMG00000174604	8q24.3	heat shock transcription factor 1	protein-coding
3172	HNF4A	FRTS4|HNF4|HNF4a7|HNF4a8|HNF4a9|HNF4alpha|MODY|MODY1|NR2A1|NR2A21|TCF|TCF14	MIM:600281|HGNC:HGNC:5024|Ensembl:ENSG00000101076|Vega:OTTHUMG00000032531	20q13.12	hepatocyte nuclear factor 4 alpha	protein-coding
3169	FOXA1	HNF3A|TCF3A	MIM:602294|HGNC:HGNC:5021|Ensembl:ENSG00000129514|Vega:OTTHUMG00000140253	14q21.1	forkhead box A1	protein-coding
2303	FOXC2	FKHL14|LD|MFH-1|MFH1	MIM:602402|HGNC:HGNC:3801|Ensembl:ENSG00000176692|Vega:OTTHUMG00000137652	16q24.1	forkhead box C2	protein-coding
2064	ERBB2	CD340|HER-2|HER-2/neu|HER2|MLN 19|NEU|NGL|TKR1	MIM:164870|HGNC:HGNC:3430|Ensembl:ENSG00000141736|Vega:OTTHUMG00000179300	17q12	erb-b2 receptor tyrosine kinase 2	protein-coding
1958	EGR1	AT225|G0S30|KROX-24|NGFI-A|TIS8|ZIF-268|ZNF225	MIM:128990|HGNC:HGNC:3238|Ensembl:ENSG00000120738|Vega:OTTHUMG00000129197	5q31.2	early growth response 1	protein-coding
11279	KLF8	BKLF3|ZNF741	MIM:300286|HGNC:HGNC:6351|Ensembl:ENSG00000102349|Vega:OTTHUMG00000021666	Xp11.21	Kruppel like factor 8	protein-coding
10763	NES	Nbla00170	MIM:600915|HGNC:HGNC:7756|Ensembl:ENSG00000132688|Vega:OTTHUMG00000034299	1q23.1	nestin	protein-coding
9891	NUAK1	ARK5	MIM:608130|HGNC:HGNC:14311|Ensembl:ENSG00000074590|Vega:OTTHUMG00000169763	12q23.3	NUAK family kinase 1	protein-coding
9201	DCLK1	CL1|CLICK1|DCAMKL1|DCDC3A|DCLK	MIM:604742|HGNC:HGNC:2700|Ensembl:ENSG00000133083|Vega:OTTHUMG00000016729	13q13.3	doublecortin like kinase 1	protein-coding
9076	CLDN1	CLD1|ILVASC|SEMP1	MIM:603718|HGNC:HGNC:2032|Ensembl:ENSG00000163347|Vega:OTTHUMG00000156214	3q28	claudin 1	protein-coding
860	RUNX2	AML3|CBF-alpha-1|CBFA1|CCD|CCD1|CLCD|OSF-2|OSF2|PEA2aA|PEBP2aA	MIM:600211|HGNC:HGNC:10472|Ensembl:ENSG00000124813|Vega:OTTHUMG00000014774	6p21.1	runt related transcription factor 2	protein-coding
80312	TET1	CXXC6|LCX|bA119F7.1	MIM:607790|HGNC:HGNC:29484|Ensembl:ENSG00000138336|Vega:OTTHUMG00000018359	10q21.3	tet methylcytosine dioxygenase 1	protein-coding
7161	TP73	P73	MIM:601990|HGNC:HGNC:12003|Ensembl:ENSG00000078900|Vega:OTTHUMG00000000610	1p36.32	tumor protein p73	protein-coding
7056	THBD	AHUS6|BDCA3|CD141|THPH12|THRM|TM	MIM:188040|HGNC:HGNC:11784|Ensembl:ENSG00000178726|Vega:OTTHUMG00000032053	20p11.21	thrombomodulin	protein-coding
7052	TGM2	TG(C)|TGC	MIM:190196|HGNC:HGNC:11778|Ensembl:ENSG00000198959|Vega:OTTHUMG00000032437	20q11.23	transglutaminase 2	protein-coding
7049	TGFBR3	BGCAN|betaglycan	MIM:600742|HGNC:HGNC:11774|Ensembl:ENSG00000069702|Vega:OTTHUMG00000010097	1p22.1	transforming growth factor beta receptor 3	protein-coding
7048	TGFBR2	AAT3|FAA3|LDS1B|LDS2|LDS2B|MFS2|RIIC|TAAD2|TGFR-2|TGFbeta-RII	MIM:190182|HGNC:HGNC:11773|Ensembl:ENSG00000163513|Vega:OTTHUMG00000130569	3p24.1	transforming growth factor beta receptor 2	protein-coding
7043	TGFB3	ARVD|ARVD1|LDS5|RNHF|TGF-beta3	MIM:190230|HGNC:HGNC:11769|Ensembl:ENSG00000119699|Vega:OTTHUMG00000171489	14q24.3	transforming growth factor beta 3	protein-coding
6786	STIM1	D11S4896E|GOK|IMD10|STRMK|TAM|TAM1	MIM:605921|HGNC:HGNC:11386|Ensembl:ENSG00000167323|Vega:OTTHUMG00000133360	11p15.4	stromal interaction molecule 1	protein-coding
6722	SRF	MCM1	MIM:600589|HGNC:HGNC:11291|Ensembl:ENSG00000112658|Vega:OTTHUMG00000014722	6p21.1	serum response factor	protein-coding
672	BRCA1	BRCAI|BRCC1|BROVCA1|FANCS|IRIS|PNCA4|PPP1R53|PSCP|RNF53	MIM:113705|HGNC:HGNC:1100|Ensembl:ENSG00000012048|Vega:OTTHUMG00000157426	17q21.31	BRCA1, DNA repair associated	protein-coding
6678	SPARC	BM-40|OI17|ON	MIM:182120|HGNC:HGNC:11219|Ensembl:ENSG00000113140|Vega:OTTHUMG00000130122	5q33.1	secreted protein acidic and cysteine rich	protein-coding
6662	SOX9	CMD1|CMPD1|SRA1|SRXX2|SRXY10	MIM:608160|HGNC:HGNC:11204|Ensembl:ENSG00000125398|Vega:OTTHUMG00000166300	17q24.3	SRY-box 9	protein-coding
6659	SOX4	EVI16	MIM:184430|HGNC:HGNC:11200|Ensembl:ENSG00000124766|Vega:OTTHUMG00000016101	6p22.3	SRY-box 4	protein-coding
6624	FSCN1	FAN1|HSN|SNL|p55	MIM:602689|HGNC:HGNC:11148|Ensembl:ENSG00000075618|Vega:OTTHUMG00000090599	7p22.1	fascin actin-bundling protein 1	protein-coding
6495	SIX1	BOS3|DFNA23|TIP39	MIM:601205|HGNC:HGNC:10887|Ensembl:ENSG00000126778|Vega:OTTHUMG00000140334	14q23.1	SIX homeobox 1	protein-coding
6382	SDC1	CD138|SDC|SYND1|syndecan	MIM:186355|HGNC:HGNC:10658|Ensembl:ENSG00000115884|Vega:OTTHUMG00000090751	2p24.1	syndecan 1	protein-coding
6304	SATB1	-	MIM:602075|HGNC:HGNC:10541|Ensembl:ENSG00000182568|Vega:OTTHUMG00000129890	3p24.3	SATB homeobox 1	protein-coding
598	BCL2L1	BCL-XL/S|BCL2L|BCLX|Bcl-X|PPP1R52	MIM:600039|HGNC:HGNC:992|Ensembl:ENSG00000171552|Vega:OTTHUMG00000032192	20q11.21	BCL2 like 1	protein-coding
58495	OVOL2	CHED|CHED1|CHED2|EUROIMAGE566589|PPCD1|ZNF339	MIM:616441|HGNC:HGNC:15804|Ensembl:ENSG00000125850|Vega:OTTHUMG00000031960	20p11.23	ovo like zinc finger 2	protein-coding
57591	MKL1	BSAC|MAL|MRTF-A	MIM:606078|HGNC:HGNC:14334|Ensembl:ENSG00000196588|Vega:OTTHUMG00000151146	22q13.1-q13.2	megakaryoblastic leukemia (translocation) 1	protein-coding
57447	NDRG2	SYLD	MIM:605272|HGNC:HGNC:14460|Ensembl:ENSG00000165795|Vega:OTTHUMG00000029619	14q11.2	NDRG family member 2	protein-coding
56648	EIF5A2	EIF-5A2|eIF5AII	MIM:605782|HGNC:HGNC:3301|Ensembl:ENSG00000163577|Vega:OTTHUMG00000158958	3q26.2	eukaryotic translation initiation factor 5A2	protein-coding
56288	PARD3	ASIP|Baz|PAR3|PAR3alpha|PARD-3|PARD3A|PPP1R118|SE2-5L16|SE2-5LT1|SE2-5T2	MIM:606745|HGNC:HGNC:16051|Ensembl:ENSG00000148498|Vega:OTTHUMG00000017948	10p11.22-p11.21	par-3 family cell polarity regulator	protein-coding
5584	PRKCI	DXS1179E|PKCI|nPKC-iota	MIM:600539|HGNC:HGNC:9404|Ensembl:ENSG00000163558|Vega:OTTHUMG00000150214	3q26.2	protein kinase C iota	protein-coding
558	AXL	ARK|JTK11|Tyro7|UFO	MIM:109135|HGNC:HGNC:905|Ensembl:ENSG00000167601|Vega:OTTHUMG00000182727	19q13.2	AXL receptor tyrosine kinase	protein-coding
55294	FBXW7	AGO|CDC4|FBW6|FBW7|FBX30|FBXO30|FBXW6|SEL-10|SEL10|hAgo|hCdc4	MIM:606278|HGNC:HGNC:16712|Ensembl:ENSG00000109670|Vega:OTTHUMG00000185246	4q31.3	F-box and WD repeat domain containing 7	protein-coding
51592	TRIM33	ECTO|PTC7|RFG7|TF1G|TIF1G|TIF1GAMMA|TIFGAMMA	MIM:605769|HGNC:HGNC:16290|Ensembl:ENSG00000197323|Vega:OTTHUMG00000011891	1p13.2	tripartite motif containing 33	protein-coding
5058	PAK1	PAKalpha	MIM:602590|HGNC:HGNC:8590|Ensembl:ENSG00000149269|Vega:OTTHUMG00000165138	11q13.5-q14.1	p21 (RAC1) activated kinase 1	protein-coding
5008	OSM	-	MIM:165095|HGNC:HGNC:8506|Ensembl:ENSG00000099985|Vega:OTTHUMG00000150913	22q12.2	oncostatin M	protein-coding
4920	ROR2	BDB|BDB1|NTRKR2	MIM:602337|HGNC:HGNC:10257|Ensembl:ENSG00000169071|Vega:OTTHUMG00000020211	9q22.31	receptor tyrosine kinase like orphan receptor 2	protein-coding
4853	NOTCH2	AGS2|HJCYS|hN2	MIM:600275|HGNC:HGNC:7882|Ensembl:ENSG00000134250|Vega:OTTHUMG00000012177	1p12	notch 2	protein-coding
4488	MSX2	CRS2|FPP|HOX8|MSH|PFM|PFM1	MIM:123101|HGNC:HGNC:7392|Ensembl:ENSG00000120149|Vega:OTTHUMG00000130556	5q35.2	msh homeobox 2	protein-coding
4323	MMP14	MMP-14|MMP-X1|MT-MMP|MT-MMP 1|MT1-MMP|MT1MMP|MTMMP1|WNCHRS	MIM:600754|HGNC:HGNC:7160|Ensembl:ENSG00000157227|Vega:OTTHUMG00000028704	14q11.2	matrix metallopeptidase 14	protein-coding
3952	LEP	LEPD|OB|OBS	MIM:164160|HGNC:HGNC:6553|Ensembl:ENSG00000174697|Vega:OTTHUMG00000157564	7q32.1	leptin	protein-coding
3897	L1CAM	CAML1|CD171|HSAS|HSAS1|MASA|MIC5|N-CAM-L1|N-CAML1|NCAM-L1|S10|SPG1	MIM:308840|HGNC:HGNC:6470|Ensembl:ENSG00000198910|Vega:OTTHUMG00000024221	Xq28	L1 cell adhesion molecule	protein-coding
389	RHOC	ARH9|ARHC|H9|RHOH9	MIM:165380|HGNC:HGNC:669|Ensembl:ENSG00000155366|Vega:OTTHUMG00000011905	1p13.2	ras homolog family member C	protein-coding
3491	CYR61	CCN1|GIG1|IGFBP10	MIM:602369|HGNC:HGNC:2654|Ensembl:ENSG00000142871|Vega:OTTHUMG00000010577	1p22.3	cysteine rich angiogenic inducer 61	protein-coding
332	BIRC5	API4|EPR-1	MIM:603352|HGNC:HGNC:593|Ensembl:ENSG00000089685|Vega:OTTHUMG00000177505	17q25.3	baculoviral IAP repeat containing 5	protein-coding
3309	HSPA5	BIP|GRP78|HEL-S-89n|MIF2	MIM:138120|HGNC:HGNC:5238|Ensembl:ENSG00000044574|Vega:OTTHUMG00000020672	9q33.3	heat shock protein family A (Hsp70) member 5	protein-coding
3209	HOXA13	HOX1|HOX1J	MIM:142959|HGNC:HGNC:5102|Ensembl:ENSG00000106031|Vega:OTTHUMG00000023438	7p15.2	homeobox A13	protein-coding
302	ANXA2	ANX2|ANX2L4|CAL1H|HEL-S-270|LIP2|LPC2|LPC2D|P36|PAP-IV	MIM:151740|HGNC:HGNC:537|Ensembl:ENSG00000182718|Vega:OTTHUMG00000132763	15q22.2	annexin A2	protein-coding
27250	PDCD4	H731	MIM:608610|HGNC:HGNC:8763|Ensembl:ENSG00000150593|Vega:OTTHUMG00000019048	10q25.2	programmed cell death 4	protein-coding
2625	GATA3	HDR|HDRS	MIM:131320|HGNC:HGNC:4172|Ensembl:ENSG00000107485|Vega:OTTHUMG00000017640	10p14	GATA binding protein 3	protein-coding
238	ALK	CD246|NBLST3	MIM:105590|HGNC:HGNC:427|Ensembl:ENSG00000171094|Vega:OTTHUMG00000152034	2p23.2-p23.1	ALK receptor tyrosine kinase	protein-coding
2319	FLOT2	ECS-1|ECS1|ESA|ESA1|M17S1	MIM:131560|HGNC:HGNC:3758|Ensembl:ENSG00000132589|Vega:OTTHUMG00000132674	17q11.2	flotillin 2	protein-coding
2309	FOXO3	AF6q21|FKHRL1|FKHRL1P2|FOXO2|FOXO3A	MIM:602681|HGNC:HGNC:3821|Ensembl:ENSG00000118689|Vega:OTTHUMG00000015327	6q21	forkhead box O3	protein-coding
2296	FOXC1	ARA|ASGD3|FKHL7|FREAC-3|FREAC3|IGDA|IHG1|IRID1|RIEG3	MIM:601090|HGNC:HGNC:3800|Ensembl:ENSG00000054598|Vega:OTTHUMG00000016182	6p25.3	forkhead box C1	protein-coding
2263	FGFR2	BBDS|BEK|BFR-1|CD332|CEK3|CFD1|ECT1|JWS|K-SAM|KGFR|TK14|TK25	MIM:176943|HGNC:HGNC:3689|Ensembl:ENSG00000066468|Vega:OTTHUMG00000019175	10q26.13	fibroblast growth factor receptor 2	protein-coding
2247	FGF2	BFGF|FGF-2|FGFB|HBGF-2	MIM:134920|HGNC:HGNC:3676|Ensembl:ENSG00000138685|Vega:OTTHUMG00000039506	4q28.1	fibroblast growth factor 2	protein-coding
208	AKT2	HIHGHH|PKBB|PKBBETA|PRKBB|RAC-BETA	MIM:164731|HGNC:HGNC:392|Ensembl:ENSG00000105221|Vega:OTTHUMG00000137375	19q13.2	AKT serine/threonine kinase 2	protein-coding
2034	EPAS1	ECYT4|HIF2A|HLF|MOP2|PASD2|bHLHe73	MIM:603349|HGNC:HGNC:3374|Ensembl:ENSG00000116016|Vega:OTTHUMG00000128818	2p21	endothelial PAS domain protein 1	protein-coding
1786	DNMT1	ADCADN|AIM|CXXC9|DNMT|HSN1E|MCMT|m.HsaI	MIM:126375|HGNC:HGNC:2976|Ensembl:ENSG00000130816|Vega:OTTHUMG00000180397	19p13.2	DNA methyltransferase 1	protein-coding
1601	DAB2	DOC-2|DOC2	MIM:601236|HGNC:HGNC:2662|Ensembl:ENSG00000153071|Vega:OTTHUMG00000162043	5p13.1	DAB2, clathrin adaptor protein	protein-coding
1523	CUX1	CASP|CDP|CDP/Cut|CDP1|COY1|CUTL1|CUX|Clox|Cux/CDP|GOLIM6|Nbla10317|p100|p110|p200|p75	MIM:116896|HGNC:HGNC:2557|Ensembl:ENSG00000257923|Vega:OTTHUMG00000157129	7q22.1	cut like homeobox 1	protein-coding
1500	CTNND1	CAS|CTNND|P120CAS|P120CTN|p120|p120(CAS)|p120(CTN)	MIM:601045|HGNC:HGNC:2515|Ensembl:ENSG00000198561|Vega:OTTHUMG00000167272	11q12.1	catenin delta 1	protein-coding
1487	CTBP1	BARS	MIM:602618|HGNC:HGNC:2494|Ensembl:ENSG00000159692|Vega:OTTHUMG00000089259	4p16.3	C-terminal binding protein 1	protein-coding
1432	MAPK14	CSBP|CSBP1|CSBP2|CSPB1|EXIP|Mxi2|PRKM14|PRKM15|RK|SAPK2A|p38|p38ALPHA	MIM:600289|HGNC:HGNC:6876|Ensembl:ENSG00000112062|Vega:OTTHUMG00000159806	6p21.31	mitogen-activated protein kinase 14	protein-coding
114548	NLRP3	AGTAVPRL|AII|AVP|C1orf7|CIAS1|CLR1.1|FCAS|FCAS1|FCU|MWS|NALP3|PYPAF1	MIM:606416|HGNC:HGNC:16400|Ensembl:ENSG00000162711|Vega:OTTHUMG00000040647	1q44	NLR family pyrin domain containing 3	protein-coding
10551	AGR2	AG-2|AG2|GOB-4|HAG-2|HEL-S-116|HPC8|PDIA17|XAG-2	MIM:606358|HGNC:HGNC:328|Ensembl:ENSG00000106541|Vega:OTTHUMG00000023446	7p21.1	anterior gradient 2, protein disulphide isomerase family member	protein-coding
10397	NDRG1	CAP43|CMT4D|DRG-1|DRG1|GC4|HMSNL|NDR1|NMSL|PROXY1|RIT42|RTP|TARG1|TDD5	MIM:605262|HGNC:HGNC:7679|Ensembl:ENSG00000104419|Vega:OTTHUMG00000164441	8q24.22	N-myc downstream regulated 1	protein-coding
1027	CDKN1B	CDKN4|KIP1|MEN1B|MEN4|P27KIP1	MIM:600778|HGNC:HGNC:1785|Ensembl:ENSG00000111276|Vega:OTTHUMG00000149914	12p13.1	cyclin dependent kinase inhibitor 1B	protein-coding
100133941	CD24	CD24A	MIM:600074|HGNC:HGNC:1645|Ensembl:ENSG00000272398|Vega:OTTHUMG00000188439	6q21	CD24 molecule	protein-coding
9966	TNFSF15	TL1|TL1A|TNLG1B|VEGI|VEGI192A	MIM:604052|HGNC:HGNC:11931|Ensembl:ENSG00000181634|Vega:OTTHUMG00000021011	9q32	TNF superfamily member 15	protein-coding
9518	GDF15	GDF-15|MIC-1|MIC1|NAG-1|PDF|PLAB|PTGFB	MIM:605312|HGNC:HGNC:30142|Ensembl:ENSG00000130513|Vega:OTTHUMG00000183360	19p13.11	growth differentiation factor 15	protein-coding
94241	TP53INP1	SIP|TP53DINP1|TP53INP1A|TP53INP1B|Teap|p53DINP1	MIM:606185|HGNC:HGNC:18022|Ensembl:ENSG00000164938|Vega:OTTHUMG00000164697	8q22.1	tumor protein p53 inducible nuclear protein 1	protein-coding
9032	TM4SF5	-	MIM:604657|HGNC:HGNC:11857|Ensembl:ENSG00000142484|Vega:OTTHUMG00000090776	17p13.2	transmembrane 4 L six family member 5	protein-coding
89780	WNT3A	-	MIM:606359|HGNC:HGNC:15983|Ensembl:ENSG00000154342|Vega:OTTHUMG00000037593	1q42.13	Wnt family member 3A	protein-coding
8839	WISP2	CCN5|CT58|CTGF-L	MIM:603399|HGNC:HGNC:12770|Ensembl:ENSG00000064205|Vega:OTTHUMG00000033071	20q13.12	WNT1 inducible signaling pathway protein 2	protein-coding
8829	NRP1	BDCA4|CD304|NP1|NRP|VEGF165R	MIM:602069|HGNC:HGNC:8004|Ensembl:ENSG00000099250|Vega:OTTHUMG00000019343	10p11.22	neuropilin 1	protein-coding
86	ACTL6A	ACTL6|ARPN-BETA|Arp4|BAF53A|INO80K	MIM:604958|HGNC:HGNC:24124|Ensembl:ENSG00000136518|Vega:OTTHUMG00000157782	3q26.33	actin like 6A	protein-coding
8451	CUL4A	-	MIM:603137|HGNC:HGNC:2554|Ensembl:ENSG00000139842|Vega:OTTHUMG00000017384	13q34	cullin 4A	protein-coding
8324	FZD7	FzE3	MIM:603410|HGNC:HGNC:4045|Ensembl:ENSG00000155760|Vega:OTTHUMG00000132841	2q33.1	frizzled class receptor 7	protein-coding
8061	FOSL1	FRA|FRA1|fra-1	MIM:136515|HGNC:HGNC:13718|Ensembl:ENSG00000175592|Vega:OTTHUMG00000166715	11q13.1	FOS like 1, AP-1 transcription factor subunit	protein-coding
8038	ADAM12	ADAM12-OT1|CAR10|MCMP|MCMPMltna|MLTN|MLTNA	MIM:602714|HGNC:HGNC:190|Ensembl:ENSG00000148848|Vega:OTTHUMG00000019243	10q26.2	ADAM metallopeptidase domain 12	protein-coding
80310	PDGFD	IEGF|MSTP036|SCDGF-B|SCDGFB	MIM:609673|HGNC:HGNC:30620|Ensembl:ENSG00000170962|Vega:OTTHUMG00000165953	11q22.3	platelet derived growth factor D	protein-coding
79805	VASH2	-	MIM:610471|HGNC:HGNC:25723|Ensembl:ENSG00000143494|Vega:OTTHUMG00000036925	1q32.3	vasohibin 2	protein-coding
79718	TBL1XR1	C21|DC42|IRA1|MRD41|TBLR1	MIM:608628|HGNC:HGNC:29529|Ensembl:ENSG00000177565|Vega:OTTHUMG00000157140	3q26.32	transducin beta like 1 X-linked receptor 1	protein-coding
79626	TNFAIP8L2	TIPE2	MIM:612112|HGNC:HGNC:26277|Ensembl:ENSG00000163154|Vega:OTTHUMG00000012259	1q21.3	TNF alpha induced protein 8 like 2	protein-coding
7532	YWHAG	14-3-3GAMMA|PPP1R170	MIM:605356|HGNC:HGNC:12852|Ensembl:ENSG00000170027|Vega:OTTHUMG00000022862	7q11.23	tyrosine 3-monooxygenase/tryptophan 5-monooxygenase activation protein gamma	protein-coding
7528	YY1	DELTA|GADEVS|INO80S|NF-E1|UCRBP|YIN-YANG-1	MIM:600013|HGNC:HGNC:12856|Ensembl:ENSG00000100811|Vega:OTTHUMG00000150479	14q32.2	YY1 transcription factor	protein-coding
7494	XBP1	TREB-5|TREB5|XBP-1|XBP2	MIM:194355|HGNC:HGNC:12801|Ensembl:ENSG00000100219|Vega:OTTHUMG00000151094	22q12.1|22q12	X-box binding protein 1	protein-coding
7490	WT1	AWT1|EWS-WT1|GUD|NPHS4|WAGR|WIT-2|WT33	MIM:607102|HGNC:HGNC:12796|Ensembl:ENSG00000184937|Vega:OTTHUMG00000039556	11p13	Wilms tumor 1	protein-coding
7421	VDR	NR1I1|PPP1R163	MIM:601769|HGNC:HGNC:12679|Ensembl:ENSG00000111424|Vega:OTTHUMG00000169890	12q13.11	vitamin D receptor	protein-coding
729230	CCR2	CC-CKR-2|CCR-2|CCR2A|CCR2B|CD192|CKR2|CKR2A|CKR2B|CMKBR2|MCP-1-R	MIM:601267|HGNC:HGNC:1603|Ensembl:ENSG00000121807|Vega:OTTHUMG00000156466	3p21.31	C-C motif chemokine receptor 2	protein-coding
7182	NR2C2	TAK1|TR4	MIM:601426|HGNC:HGNC:7972|Ensembl:ENSG00000177463|Vega:OTTHUMG00000129839	3p25.1	nuclear receptor subfamily 2 group C member 2	protein-coding
7077	TIMP2	CSC-21K|DDC8	MIM:188825|HGNC:HGNC:11821|Ensembl:ENSG00000035862|Vega:OTTHUMG00000154517	17q25.3	TIMP metallopeptidase inhibitor 2	protein-coding
7046	TGFBR1	AAT5|ACVRLK4|ALK-5|ALK5|ESS1|LDS1|LDS1A|LDS2A|MSSE|SKR4|TGFR-1|tbetaR-I	MIM:190181|HGNC:HGNC:11772|Ensembl:ENSG00000106799|Vega:OTTHUMG00000020353	9q22.33	transforming growth factor beta receptor 1	protein-coding
7039	TGFA	TFGA	MIM:190170|HGNC:HGNC:11765|Ensembl:ENSG00000163235|Vega:OTTHUMG00000129669	2p13.3	transforming growth factor alpha	protein-coding
7015	TERT	CMM9|DKCA2|DKCB4|EST2|PFBMFT1|TCS1|TP2|TRT|hEST2|hTRT	MIM:187270|HGNC:HGNC:11730|Ensembl:ENSG00000164362|Vega:OTTHUMG00000090357	5p15.33	telomerase reverse transcriptase	protein-coding
6925	TCF4	E2-2|FECD3|ITF-2|ITF2|PTHS|SEF-2|SEF2|SEF2-1|SEF2-1A|SEF2-1B|SEF2-1D|TCF-4|bHLHb19	MIM:602272|HGNC:HGNC:11634|Ensembl:ENSG00000196628|Vega:OTTHUMG00000132713	18q21.2	transcription factor 4	protein-coding
682	BSG	5F7|CD147|EMMPRIN|OK|TCSF	MIM:109480|HGNC:HGNC:1116|Ensembl:ENSG00000172270|Vega:OTTHUMG00000177718	19p13.3	basigin (Ok blood group)	protein-coding
6700	SPRR2A	-	MIM:182267|HGNC:HGNC:11261|Ensembl:ENSG00000241794|Vega:OTTHUMG00000014395	1q21.3	small proline rich protein 2A	protein-coding
6696	SPP1	BNSP|BSPI|ETA-1|OPN	MIM:166490|HGNC:HGNC:11255|Ensembl:ENSG00000118785|Vega:OTTHUMG00000130599	4q22.1	secreted phosphoprotein 1	protein-coding
6498	SKIL	SNO|SnoA|SnoI|SnoN	MIM:165340|HGNC:HGNC:10897|Ensembl:ENSG00000136603|Vega:OTTHUMG00000158831	3q26.2	SKI like proto-oncogene	protein-coding
64750	SMURF2	-	MIM:605532|HGNC:HGNC:16809|Ensembl:ENSG00000108854|Vega:OTTHUMG00000179189	17q23.3-q24.1	SMAD specific E3 ubiquitin protein ligase 2	protein-coding
6423	SFRP2	FRP-2|SARP1|SDF-5	MIM:604157|HGNC:HGNC:10777|Ensembl:ENSG00000145423|Vega:OTTHUMG00000161559	4q31.3	secreted frizzled related protein 2	protein-coding
6374	CXCL5	ENA-78|SCYB5	MIM:600324|HGNC:HGNC:10642|Ensembl:ENSG00000163735|Vega:OTTHUMG00000160871	4q13.3	C-X-C motif chemokine ligand 5	protein-coding
6352	CCL5	D17S136E|RANTES|SCYA5|SIS-delta|SISd|TCP228|eoCP	MIM:187011|HGNC:HGNC:10632|Ensembl:ENSG00000271503|Vega:OTTHUMG00000188396	17q12	C-C motif chemokine ligand 5	protein-coding
627	BDNF	ANON2|BULN2	MIM:113505|HGNC:HGNC:1033|Ensembl:ENSG00000176697|Vega:OTTHUMG00000178797	11p14.1	brain derived neurotrophic factor	protein-coding
596	BCL2	Bcl-2|PPP1R50	MIM:151430|HGNC:HGNC:990|Ensembl:ENSG00000171791|Vega:OTTHUMG00000132791	18q21.33	BCL2, apoptosis regulator	protein-coding
5925	RB1	OSRC|PPP1R130|RB|p105-Rb|pRb|pp110	MIM:614041|HGNC:HGNC:9884|Ensembl:ENSG00000139687|Vega:OTTHUMG00000016900	13q14.2	RB transcriptional corepressor 1	protein-coding
5781	PTPN11	BPTP3|CFC|JMML|METCDS|NS1|PTP-1D|PTP2C|SH-PTP2|SH-PTP3|SHP2	MIM:176876|HGNC:HGNC:9644|Ensembl:ENSG00000179295|Vega:OTTHUMG00000134334	12q24.13	protein tyrosine phosphatase, non-receptor type 11	protein-coding
57214	CEMIP	CCSP1|HYBID|KIAA1199|TMEM2L	MIM:608366|HGNC:HGNC:29213|Ensembl:ENSG00000103888|Vega:OTTHUMG00000144184	15q25.1	cell migration inducing hyaluronan binding protein	protein-coding
57167	SALL4	DRRS|HSAL4|ZNF797	MIM:607343|HGNC:HGNC:15924|Ensembl:ENSG00000101115|Vega:OTTHUMG00000032752	20q13.2	spalt like transcription factor 4	protein-coding
56649	TMPRSS4	CAPH2|MT-SP2|TMPRSS3	MIM:606565|HGNC:HGNC:11878|Ensembl:ENSG00000137648|Vega:OTTHUMG00000164122	11q23.3	transmembrane protease, serine 4	protein-coding
5599	MAPK8	JNK|JNK-46|JNK1|JNK1A2|JNK21B1/2|PRKM8|SAPK1|SAPK1c	MIM:601158|HGNC:HGNC:6881|Ensembl:ENSG00000107643|Vega:OTTHUMG00000018172	10q11.22	mitogen-activated protein kinase 8	protein-coding
5578	PRKCA	AAG6|PKC-alpha|PKCA|PRKACA	MIM:176960|HGNC:HGNC:9393|Ensembl:ENSG00000154229|Vega:OTTHUMG00000179533	17q24.2	protein kinase C alpha	protein-coding
54910	SEMA4C	M-SEMA-F|SEMACL1|SEMAF|SEMAI	MIM:604462|HGNC:HGNC:10731|Ensembl:ENSG00000168758|Vega:OTTHUMG00000130535	2q11.2	semaphorin 4C	protein-coding
5300	PIN1	DOD|UBL5	MIM:601052|HGNC:HGNC:8988|Ensembl:ENSG00000127445|Vega:OTTHUMG00000180388	19p13.2	peptidylprolyl cis/trans isomerase, NIMA-interacting 1	protein-coding
5228	PGF	D12S1900|PGFL|PIGF|PLGF|PlGF-2|SHGC-10760	MIM:601121|HGNC:HGNC:8893|Ensembl:ENSG00000119630|Vega:OTTHUMG00000171496	14q24.3	placental growth factor	protein-coding
5176	SERPINF1	EPC-1|OI12|OI6|PEDF|PIG35	MIM:172860|HGNC:HGNC:8824|Ensembl:ENSG00000132386|Vega:OTTHUMG00000090571	17p13.3	serpin family F member 1	protein-coding
51280	GOLM1	C9orf155|GOLPH2|GP73|HEL46|PSEC0257|bA379P1.3	MIM:606804|HGNC:HGNC:15451|Ensembl:ENSG00000135052|Vega:OTTHUMG00000020130	9q21.33	golgi membrane protein 1	protein-coding
5074	PAWR	PAR4|Par-4	MIM:601936|HGNC:HGNC:8614|Ensembl:ENSG00000177425|Vega:OTTHUMG00000170080	12q21.2	pro-apoptotic WT1 regulator	protein-coding
4838	NODAL	HTX5	MIM:601265|HGNC:HGNC:7865|Ensembl:ENSG00000156574|Vega:OTTHUMG00000018408	10q22.1	nodal growth differentiation factor	protein-coding
472	ATM	AT1|ATA|ATC|ATD|ATDC|ATE|TEL1|TELO1	MIM:607585|HGNC:HGNC:795|Ensembl:ENSG00000149311|Vega:OTTHUMG00000166480	11q22.3	ATM serine/threonine kinase	protein-coding
4585	MUC4	ASGP|HSA276359|MUC-4	MIM:158372|HGNC:HGNC:7514|Ensembl:ENSG00000145113|Vega:OTTHUMG00000151827	3q29	mucin 4, cell surface associated	protein-coding
4316	MMP7	MMP-7|MPSL1|PUMP-1	MIM:178990|HGNC:HGNC:7174|Ensembl:ENSG00000137673|Vega:OTTHUMG00000048193	11q22.2	matrix metallopeptidase 7	protein-coding
4303	FOXO4	AFX|AFX1|MLLT7	MIM:300033|HGNC:HGNC:7139|Ensembl:ENSG00000184481|Vega:OTTHUMG00000021789	Xq13.1	forkhead box O4	protein-coding
4216	MAP3K4	MAPKKK4|MEKK 4|MEKK4|MTK1|PRO0412	MIM:602425|HGNC:HGNC:6856|Ensembl:ENSG00000085511|Vega:OTTHUMG00000015968	6q26	mitogen-activated protein kinase kinase kinase 4	protein-coding
4215	MAP3K3	MAPKKK3|MEKK3	MIM:602539|HGNC:HGNC:6855|Ensembl:ENSG00000198909|Vega:OTTHUMG00000178905	17q23.3	mitogen-activated protein kinase kinase kinase 3	protein-coding
4193	MDM2	ACTFS|HDMX|hdm2	MIM:164785|HGNC:HGNC:6973|Ensembl:ENSG00000135679|Vega:OTTHUMG00000142827	12q15	MDM2 proto-oncogene	protein-coding
3726	JUNB	AP-1	MIM:165161|HGNC:HGNC:6205|Ensembl:ENSG00000171223|Vega:OTTHUMG00000180373	19p13.13	JunB proto-oncogene, AP-1 transcription factor subunit	protein-coding
3678	ITGA5	CD49e|FNRA|VLA-5|VLA5A	MIM:135620|HGNC:HGNC:6141|Ensembl:ENSG00000161638|Vega:OTTHUMG00000169841	12q13.13	integrin subunit alpha 5	protein-coding
3490	IGFBP7	AGM|FSTL2|IBP-7|IGFBP-7|IGFBP-7v|IGFBPRP1|MAC25|PSF|RAMSVPS|TAF	MIM:602867|HGNC:HGNC:5476|Ensembl:ENSG00000163453|Vega:OTTHUMG00000128772	4q12	insulin like growth factor binding protein 7	protein-coding
3315	HSPB1	CMT2F|HEL-S-102|HMN2B|HS.76067|HSP27|HSP28|Hsp25|SRP27	MIM:602195|HGNC:HGNC:5246|Ensembl:ENSG00000106211|Vega:OTTHUMG00000023228	7q11.23	heat shock protein family B (small) member 1	protein-coding
3308	HSPA4	APG-2|HEL-S-5a|HS24/P52|HSPH2|RY|hsp70|hsp70RY	MIM:601113|HGNC:HGNC:5237|Ensembl:ENSG00000170606|Vega:OTTHUMG00000129012	5q31.1	heat shock protein family A (Hsp70) member 4	protein-coding
3217	HOXB7	HHO.C1|HOX2|HOX2C|Hox-2.3	MIM:142962|HGNC:HGNC:5118|Ensembl:ENSG00000260027|Vega:OTTHUMG00000170231	17q21.32	homeobox B7	protein-coding
3170	FOXA2	HNF3B|TCF3B	MIM:600288|HGNC:HGNC:5022|Ensembl:ENSG00000125798|Vega:OTTHUMG00000191876	20p11.21	forkhead box A2	protein-coding
3162	HMOX1	HMOX1D|HO-1|HSP32|bK286B10	MIM:141250|HGNC:HGNC:5013|Ensembl:ENSG00000100292|Vega:OTTHUMG00000150960	22q12.3	heme oxygenase 1	protein-coding
3068	HDGF	HMG1L2	MIM:600339|HGNC:HGNC:4856|Ensembl:ENSG00000143321|Vega:OTTHUMG00000041295	1q23.1	heparin binding growth factor	protein-coding
3037	HAS2	-	MIM:601636|HGNC:HGNC:4819|Ensembl:ENSG00000170961|Vega:OTTHUMG00000164953	8q24.13	hyaluronan synthase 2	protein-coding
29843	SENP1	SuPr-2	MIM:612157|HGNC:HGNC:17927|Ensembl:ENSG00000079387|Vega:OTTHUMG00000169896	12q13.11	SUMO1/sentrin specific peptidase 1	protein-coding
28984	RGCC	C13orf15|RGC-32|RGC32|bA157L14.2	MIM:610077|HGNC:HGNC:20369|Ensembl:ENSG00000102760|Vega:OTTHUMG00000016796	13q14.11	regulator of cell cycle	protein-coding
2719	GPC3	DGSX|GTR2-2|MXR7|OCI-5|SDYS|SGB|SGBS|SGBS1	MIM:300037|HGNC:HGNC:4451|Ensembl:ENSG00000147257|Vega:OTTHUMG00000022448	Xq26.2	glypican 3	protein-coding
23326	USP22	USP3L	MIM:612116|HGNC:HGNC:12621|Ensembl:ENSG00000124422|Vega:OTTHUMG00000133621	17p11.2	ubiquitin specific peptidase 22	protein-coding
2308	FOXO1	FKH1|FKHR|FOXO1A	MIM:136533|HGNC:HGNC:3819|Ensembl:ENSG00000150907|Vega:OTTHUMG00000016775	13q14.11	forkhead box O1	protein-coding
22943	DKK1	DKK-1|SK	MIM:605189|HGNC:HGNC:2891|Ensembl:ENSG00000107984|Vega:OTTHUMG00000018247	10q21.1	dickkopf WNT signaling pathway inhibitor 1	protein-coding
2202	EFEMP1	DHRD|DRAD|FBLN3|FBNL|FIBL-3|MLVT|MTLV|S1-5	MIM:601548|HGNC:HGNC:3218|Ensembl:ENSG00000115380|Vega:OTTHUMG00000129343	2p16.1	EGF containing fibulin like extracellular matrix protein 1	protein-coding
220001	VWCE	URG11|VWC1	MIM:611115|HGNC:HGNC:26487|Ensembl:ENSG00000167992|Vega:OTTHUMG00000168208	11q12.2	von Willebrand factor C and EGF domains	protein-coding
2149	F2R	CF2R|HTR|PAR-1|PAR1|TR	MIM:187930|HGNC:HGNC:3537|Ensembl:ENSG00000181104|Vega:OTTHUMG00000131299	5q13.3	coagulation factor II thrombin receptor	protein-coding
2001	ELF5	ESE2	MIM:605169|HGNC:HGNC:3320|Ensembl:ENSG00000135374|Vega:OTTHUMG00000166451	11p13	E74 like ETS transcription factor 5	protein-coding
1969	EPHA2	ARCC2|CTPA|CTPP1|CTRCT6|ECK	MIM:176946|HGNC:HGNC:3386|Ensembl:ENSG00000142627|Vega:OTTHUMG00000009527	1p36.13	EPH receptor A2	protein-coding
1906	EDN1	ARCND3|ET1|HDLCQ7|PPET1|QME	MIM:131240|HGNC:HGNC:3176|Ensembl:ENSG00000078401|Vega:OTTHUMG00000014266	6p24.1	endothelin 1	protein-coding
182	JAG1	AGS|AGS1|AHD|AWS|CD339|HJ1|JAGL1	MIM:601920|HGNC:HGNC:6188|Ensembl:ENSG00000101384|Vega:OTTHUMG00000031872	20p12.2	jagged 1	protein-coding
1746	DLX2	TES-1|TES1	MIM:126255|HGNC:HGNC:2915|Ensembl:ENSG00000115844|Vega:OTTHUMG00000132276	2q31.1	distal-less homeobox 2	protein-coding
1514	CTSL	CATL|CTSL1|MEP	MIM:116880|HGNC:HGNC:2537|Ensembl:ENSG00000135047|Vega:OTTHUMG00000020149	9q21.33	cathepsin L	protein-coding
142	PARP1	ADPRT|ADPRT 1|ADPRT1|ARTD1|PARP|PARP-1|PPOL|pADPRT-1	MIM:173870|HGNC:HGNC:270|Ensembl:ENSG00000143799|Vega:OTTHUMG00000037556	1q42.12	poly(ADP-ribose) polymerase 1	protein-coding
1399	CRKL	-	MIM:602007|HGNC:HGNC:2363|Ensembl:ENSG00000099942|Vega:OTTHUMG00000150807	22q11.21	CRK like proto-oncogene, adaptor protein	protein-coding
10979	FERMT2	KIND2|MIG2|PLEKHC1|UNC112|UNC112B|mig-2	MIM:607746|HGNC:HGNC:15767|Ensembl:ENSG00000073712|Vega:OTTHUMG00000140309	14q22.1	fermitin family member 2	protein-coding
10628	TXNIP	ARRDC6|EST01027|HHCPA78|THIF|VDUP1	MIM:606599|HGNC:HGNC:16952|Ensembl:ENSG00000265972|Vega:OTTHUMG00000013755	1q21.1	thioredoxin interacting protein	protein-coding
10253	SPRY2	IGAN3|hSPRY2	MIM:602466|HGNC:HGNC:11270|Ensembl:ENSG00000136158|Vega:OTTHUMG00000017140	13q31.1	sprouty RTK signaling antagonist 2	protein-coding
102	ADAM10	AD10|AD18|CD156c|CDw156|HsT18717|MADM|RAK|kuz	MIM:602192|HGNC:HGNC:188|Ensembl:ENSG00000137845|Vega:OTTHUMG00000132633	15q21.3	ADAM metallopeptidase domain 10	protein-coding
10155	TRIM28	KAP1|PPP1R157|RNF96|TF1B|TIF1B	MIM:601742|HGNC:HGNC:16384|Ensembl:ENSG00000130726|Vega:OTTHUMG00000183546	19q13.43	tripartite motif containing 28	protein-coding
10135	NAMPT	1110035O14Rik|PBEF|PBEF1|VF|VISFATIN	MIM:608764|HGNC:HGNC:30092|Ensembl:ENSG00000105835|Vega:OTTHUMG00000140388	7q22.3	nicotinamide phosphoribosyltransferase	protein-coding
10013	HDAC6	CPBHM|HD6|JM21|PPP1R90	MIM:300272|HGNC:HGNC:14064|Ensembl:ENSG00000094631|Vega:OTTHUMG00000034496	Xp11.23	histone deacetylase 6	protein-coding
10009	ZBTB33	ZNF-kaiso|ZNF348	MIM:300329|HGNC:HGNC:16682|Ensembl:ENSG00000177485|Vega:OTTHUMG00000171159	Xq24	zinc finger and BTB domain containing 33	protein-coding
998	CDC42	CDC42Hs|G25K|TKS	MIM:116952|HGNC:HGNC:1736|Ensembl:ENSG00000070831|Vega:OTTHUMG00000002753	1p36.12	cell division cycle 42	protein-coding
9953	HS3ST3B1	3-OST-3B|3OST3B1|h3-OST-3B	MIM:604058|HGNC:HGNC:5198|Ensembl:ENSG00000125430|Vega:OTTHUMG00000058810	17p12	heparan sulfate-glucosamine 3-sulfotransferase 3B1	protein-coding
9869	SETDB1	ESET|H3-K9-HMTase4|KG1T|KMT1E|TDRD21	MIM:604396|HGNC:HGNC:10761|Ensembl:ENSG00000143379|Vega:OTTHUMG00000035003	1q21.3	SET domain bifurcated 1	protein-coding
9759	HDAC4	AHO3|BDMR|HA6116|HD4|HDAC-4|HDAC-A|HDACA	MIM:605314|HGNC:HGNC:14063|Ensembl:ENSG00000068024|Vega:OTTHUMG00000133344	2q37.3	histone deacetylase 4	protein-coding
9690	UBE3C	HECTH2	MIM:614454|HGNC:HGNC:16803|Ensembl:ENSG00000009335|Vega:OTTHUMG00000157239	7q36.3	ubiquitin protein ligase E3C	protein-coding
9531	BAG3	BAG-3|BIS|CAIR-1|MFM6	MIM:603883|HGNC:HGNC:939|Ensembl:ENSG00000151929|Vega:OTTHUMG00000019155	10q26.11	BCL2 associated athanogene 3	protein-coding
9500	MAGED1	DLXIN-1|NRAGE	MIM:300224|HGNC:HGNC:6813|Ensembl:ENSG00000179222|Vega:OTTHUMG00000021540	Xp11.22	MAGE family member D1	protein-coding
948	CD36	BDPLT10|CHDS7|FAT|GP3B|GP4|GPIV|PASIV|SCARB3	MIM:173510|HGNC:HGNC:1663|Ensembl:ENSG00000135218|Vega:OTTHUMG00000155383	7q21.11	CD36 molecule	protein-coding
9429	ABCG2	ABC15|ABCP|BCRP|BCRP1|BMDP|CD338|CDw338|EST157481|GOUT1|MRX|MXR|MXR-1|MXR1|UAQTL1	MIM:603756|HGNC:HGNC:74|Ensembl:ENSG00000118777|Vega:OTTHUMG00000130601	4q22.1	ATP binding cassette subfamily G member 2 (Junior blood group)	protein-coding
9423	NTN1	NTN1L	MIM:601614|HGNC:HGNC:8029|Ensembl:ENSG00000065320|Vega:OTTHUMG00000130257	17p13.1	netrin 1	protein-coding
9370	ADIPOQ	ACDC|ACRP30|ADIPQTL1|ADPN|APM-1|APM1|GBP28	MIM:605441|HGNC:HGNC:13633|Ensembl:ENSG00000181092|Vega:OTTHUMG00000156521	3q27.3	adiponectin, C1Q and collagen domain containing	protein-coding
9025	RNF8	hRNF8	MIM:611685|HGNC:HGNC:10071|Ensembl:ENSG00000112130|Vega:OTTHUMG00000014620	6p21.2	ring finger protein 8	protein-coding
90	ACVR1	ACTRI|ACVR1A|ACVRLK2|ALK2|FOP|SKR1|TSRI	MIM:102576|HGNC:HGNC:171|Ensembl:ENSG00000115170|Vega:OTTHUMG00000131967	2q24.1	activin A receptor type 1	protein-coding
890	CCNA2	CCN1|CCNA	MIM:123835|HGNC:HGNC:1578|Ensembl:ENSG00000145386|Vega:OTTHUMG00000133072	4q27	cyclin A2	protein-coding
8878	SQSTM1	A170|DMRV|FTDALS3|NADGP|OSIL|PDB3|ZIP3|p60|p62|p62B	MIM:601530|HGNC:HGNC:11280|Ensembl:ENSG00000161011|Vega:OTTHUMG00000150643	5q35.3	sequestosome 1	protein-coding
8877	SPHK1	SPHK	MIM:603730|HGNC:HGNC:11240|Ensembl:ENSG00000176170|Vega:OTTHUMG00000180177	17q25.1	sphingosine kinase 1	protein-coding
8841	HDAC3	HD3|RPD3|RPD3-2	MIM:605166|HGNC:HGNC:4854|Ensembl:ENSG00000171720|Vega:OTTHUMG00000129629	5q31.3	histone deacetylase 3	protein-coding
8838	WISP3	CCN6|LIBC|PPAC|PPD|WISP-3	MIM:603400|HGNC:HGNC:12771|Ensembl:ENSG00000112761|Vega:OTTHUMG00000185101	6q21	WNT1 inducible signaling pathway protein 3	protein-coding
8828	NRP2	NP2|NPN2|PRO2714|VEGF165R2	MIM:602070|HGNC:HGNC:8005|Ensembl:ENSG00000118257|Vega:OTTHUMG00000132893	2q33.3	neuropilin 2	protein-coding
864	RUNX3	AML2|CBFA3|PEBP2aC	MIM:600210|HGNC:HGNC:10473|Ensembl:ENSG00000020633|Vega:OTTHUMG00000003316	1p36.11	runt related transcription factor 3	protein-coding
8614	STC2	STC-2|STCRP	MIM:603665|HGNC:HGNC:11374|Ensembl:ENSG00000113739|Vega:OTTHUMG00000130542	5q35.2	stanniocalcin 2	protein-coding
861	RUNX1	AML1|AML1-EVI-1|AMLCR1|CBF2alpha|CBFA2|EVI-1|PEBP2aB|PEBP2alpha	MIM:151385|HGNC:HGNC:10471|Ensembl:ENSG00000159216|Vega:OTTHUMG00000086299	21q22.12	runt related transcription factor 1	protein-coding
8600	TNFSF11	CD254|ODF|OPGL|OPTB2|RANKL|TNLG6B|TRANCE|hRANKL2|sOdf	MIM:602642|HGNC:HGNC:11926|Ensembl:ENSG00000120659|Vega:OTTHUMG00000016807	13q14.11	TNF superfamily member 11	protein-coding
8553	BHLHE40	BHLHB2|Clast5|DEC1|HLHB2|SHARP-2|SHARP2|STRA13|Stra14	MIM:604256|HGNC:HGNC:1046|Ensembl:ENSG00000134107|Vega:OTTHUMG00000119035	3p26.1	basic helix-loop-helix family member e40	protein-coding
8549	LGR5	FEX|GPR49|GPR67|GRP49|HG38	MIM:606667|HGNC:HGNC:4504|Ensembl:ENSG00000139292|Vega:OTTHUMG00000169543	12q21.1	leucine rich repeat containing G protein-coupled receptor 5	protein-coding
84868	HAVCR2	CD366|HAVcr-2|KIM-3|TIM3|TIMD-3|TIMD3|Tim-3	MIM:606652|HGNC:HGNC:18437|Ensembl:ENSG00000135077|Vega:OTTHUMG00000130249	5q33.3	hepatitis A virus cellular receptor 2	protein-coding
84632	AFAP1L2	CTB-1144G6.4|KIAA1914|XB130	MIM:612420|HGNC:HGNC:25901|Ensembl:ENSG00000169129|Vega:OTTHUMG00000019086	10q25.3	actin filament associated protein 1 like 2	protein-coding
8445	DYRK2	-	MIM:603496|HGNC:HGNC:3093|Ensembl:ENSG00000127334|Vega:OTTHUMG00000169089	12q15	dual specificity tyrosine phosphorylation regulated kinase 2	protein-coding
83394	PITPNM3	ACKR6|CORD5|NIR1|RDGBA3	MIM:608921|HGNC:HGNC:21043|Ensembl:ENSG00000091622|Vega:OTTHUMG00000102039	17p13.2-p13.1	PITPNM family member 3	protein-coding
8313	AXIN2	AXIL|ODCRCS	MIM:604025|HGNC:HGNC:904|Ensembl:ENSG00000168646|Vega:OTTHUMG00000179353	17q24.1	axin 2	protein-coding
8312	AXIN1	AXIN|PPP1R49	MIM:603816|HGNC:HGNC:903|Ensembl:ENSG00000103126|Vega:OTTHUMG00000064930	16p13.3	axin 1	protein-coding
8202	NCOA3	ACTR|AIB-1|AIB1|CAGH16|CTG26|KAT13B|RAC3|SRC-3|SRC3|TNRC14|TNRC16|TRAM-1|bHLHe42|pCIP	MIM:601937|HGNC:HGNC:7670|Ensembl:ENSG00000124151|Vega:OTTHUMG00000033061	20q13.12	nuclear receptor coactivator 3	protein-coding
81	ACTN4	ACTININ-4|FSGS|FSGS1	MIM:604638|HGNC:HGNC:166|Ensembl:ENSG00000130402|Vega:OTTHUMG00000137382	19q13.2	actinin alpha 4	protein-coding
80004	ESRP2	RBM35B	MIM:612960|HGNC:HGNC:26152|Ensembl:ENSG00000103067|Vega:OTTHUMG00000137557	16q22.1	epithelial splicing regulatory protein 2	protein-coding
79834	PEAK1	SGK269	MIM:614248|HGNC:HGNC:29431|Ensembl:ENSG00000173517|Vega:OTTHUMG00000172618	15q24.3	pseudopodium enriched atypical kinase 1	protein-coding
768	CA9	CAIX|MN	MIM:603179|HGNC:HGNC:1383|Ensembl:ENSG00000107159|Vega:OTTHUMG00000021029	9p13.3	carbonic anhydrase 9	protein-coding
7534	YWHAZ	14-3-3-zeta|HEL-S-3|HEL-S-93|HEL4|KCIP-1|YWHAD	MIM:601288|HGNC:HGNC:12855|Ensembl:ENSG00000164924|Vega:OTTHUMG00000134291	8q22.3	tyrosine 3-monooxygenase/tryptophan 5-monooxygenase activation protein zeta	protein-coding
7403	KDM6A	KABUK2|UTX|bA386N14.2	MIM:300128|HGNC:HGNC:12637|Ensembl:ENSG00000147050|Vega:OTTHUMG00000021402	Xp11.3	lysine demethylase 6A	protein-coding
7286	TUFT1	-	MIM:600087|HGNC:HGNC:12422|Ensembl:ENSG00000143367|Vega:OTTHUMG00000012536	1q21.3	tuftelin 1	protein-coding
7162	TPBG	5T4|5T4AG|M6P1|WAIF1	MIM:190920|HGNC:HGNC:12004|Ensembl:ENSG00000146242|Vega:OTTHUMG00000015103	6q14.1	trophoblast glycoprotein	protein-coding
7159	TP53BP2	53BP2|ASPP2|BBP|P53BP2|PPP1R13A	MIM:602143|HGNC:HGNC:12000|Ensembl:ENSG00000143514|Vega:OTTHUMG00000037379	1q41	tumor protein p53 binding protein 2	protein-coding
7088	TLE1	ESG|ESG1|GRG1	MIM:600189|HGNC:HGNC:11837|Ensembl:ENSG00000196781|Vega:OTTHUMG00000021008	9q21.32	transducin like enhancer of split 1	protein-coding
7076	TIMP1	CLGI|EPA|EPO|HCI|TIMP|TIMP-1	MIM:305370|HGNC:HGNC:11820|Ensembl:ENSG00000102265|Vega:OTTHUMG00000021447	Xp11.3	TIMP metallopeptidase inhibitor 1	protein-coding
7074	TIAM1	TIAM-1	MIM:600687|HGNC:HGNC:11805|Ensembl:ENSG00000156299|Vega:OTTHUMG00000084869	21q22.11	T-cell lymphoma invasion and metastasis 1	protein-coding
7041	TGFB1I1	ARA55|HIC-5|HIC5|TSC-5	MIM:602353|HGNC:HGNC:11767|Ensembl:ENSG00000140682|Vega:OTTHUMG00000132467	16p11.2	transforming growth factor beta 1 induced transcript 1	protein-coding
7003	TEAD1	AA|NTEF-1|REF1|TCF-13|TCF13|TEAD-1|TEF-1	MIM:189967|HGNC:HGNC:11714|Ensembl:ENSG00000187079|Vega:OTTHUMG00000165878	11p15.3	TEA domain transcription factor 1	protein-coding
6943	TCF21	POD1|bHLHa23	MIM:603306|HGNC:HGNC:11632|Ensembl:ENSG00000118526|Vega:OTTHUMG00000015608	6q23.2	transcription factor 21	protein-coding
6885	MAP3K7	CSCF|FMD2|MEKK7|TAK1|TGF1a	MIM:602614|HGNC:HGNC:6859|Ensembl:ENSG00000135341|Vega:OTTHUMG00000015217	6q15	mitogen-activated protein kinase kinase kinase 7	protein-coding
6777	STAT5B	STAT5	MIM:604260|HGNC:HGNC:11367|Ensembl:ENSG00000173757|Vega:OTTHUMG00000150724	17q21.2	signal transducer and activator of transcription 5B	protein-coding
6776	STAT5A	MGF|STAT5	MIM:601511|HGNC:HGNC:11366|Ensembl:ENSG00000126561|Vega:OTTHUMG00000150725	17q21.2	signal transducer and activator of transcription 5A	protein-coding
6772	STAT1	CANDF7|IMD31A|IMD31B|IMD31C|ISGF-3|STAT91	MIM:600555|HGNC:HGNC:11362|Ensembl:ENSG00000115415|Vega:OTTHUMG00000132699	2q32.2	signal transducer and activator of transcription 1	protein-coding
673	BRAF	B-RAF1|B-raf|BRAF1|NS7|RAFB1	MIM:164757|HGNC:HGNC:1097|Ensembl:ENSG00000157764|Vega:OTTHUMG00000157457	7q34	B-Raf proto-oncogene, serine/threonine kinase	protein-coding
6717	SRI	CP-22|CP22|SCN|V19	MIM:182520|HGNC:HGNC:11292|Ensembl:ENSG00000075142|Vega:OTTHUMG00000157267	7q21.12	sorcin	protein-coding
6695	SPOCK1	SPOCK|TESTICAN|TIC1	MIM:602264|HGNC:HGNC:11251|Ensembl:ENSG00000152377|Vega:OTTHUMG00000129157	5q31.2	SPARC/osteonectin, cwcv and kazal like domains proteoglycan 1	protein-coding
6660	SOX5	L-SOX5|L-SOX5B|L-SOX5F|LAMSHF	MIM:604975|HGNC:HGNC:11201|Ensembl:ENSG00000134532|Vega:OTTHUMG00000169026	12p12.1	SRY-box 5	protein-coding
654	BMP6	VGR|VGR1	MIM:112266|HGNC:HGNC:1073|Ensembl:ENSG00000153162|Vega:OTTHUMG00000014217	6p24.3	bone morphogenetic protein 6	protein-coding
6502	SKP2	FBL1|FBXL1|FLB1|p45	MIM:601436|HGNC:HGNC:10901|Ensembl:ENSG00000145604|Vega:OTTHUMG00000131106	5p13.2	S-phase kinase associated protein 2	protein-coding
6493	SIM2	HMC13F06|HMC29C01|SIM|bHLHe15	MIM:600892|HGNC:HGNC:10883|Ensembl:ENSG00000159263|Vega:OTTHUMG00000086637	21q22.13	single-minded family bHLH transcription factor 2	protein-coding
6383	SDC2	CD362|HSPG|HSPG1|SYND2	MIM:142460|HGNC:HGNC:10659|Ensembl:ENSG00000169439|Vega:OTTHUMG00000164689	8q22.1	syndecan 2	protein-coding
6363	CCL19	CKb11|ELC|MIP-3b|MIP3B|SCYA19	MIM:602227|HGNC:HGNC:10617|Ensembl:ENSG00000172724|Vega:OTTHUMG00000019833	9p13.3	C-C motif chemokine ligand 19	protein-coding
634	CEACAM1	BGP|BGP1|BGPI	MIM:109770|HGNC:HGNC:1814|Ensembl:ENSG00000079385|Vega:OTTHUMG00000151078	19q13.2	carcinoembryonic antigen related cell adhesion molecule 1	protein-coding
6198	RPS6KB1	PS6K|S6K|S6K-beta-1|S6K1|STK14A|p70 S6KA|p70(S6K)-alpha|p70-S6K|p70-alpha	MIM:608938|HGNC:HGNC:10436|Ensembl:ENSG00000108443|Vega:OTTHUMG00000150642	17q23.1	ribosomal protein S6 kinase B1	protein-coding
60529	ALX4	CRS5|FND2	MIM:605420|HGNC:HGNC:450|Ensembl:ENSG00000052850|Vega:OTTHUMG00000166557	11p11.2	ALX homeobox 4	protein-coding
6050	RNH1	RAI|RNH	MIM:173320|HGNC:HGNC:10074|Ensembl:ENSG00000023191|Vega:OTTHUMG00000119086	11p15.5	ribonuclease/angiogenin inhibitor 1	protein-coding
595	CCND1	BCL1|D11S287E|PRAD1|U21B31	MIM:168461|HGNC:HGNC:1582|Ensembl:ENSG00000110092|Vega:OTTHUMG00000167877	11q13.3	cyclin D1	protein-coding
5927	KDM5A	RBBP-2|RBBP2|RBP2	MIM:180202|HGNC:HGNC:9886|Ensembl:ENSG00000073614|Vega:OTTHUMG00000168055	12p13.33	lysine demethylase 5A	protein-coding
59	ACTA2	AAT6|ACTSA|MYMY5	MIM:102620|HGNC:HGNC:130|Ensembl:ENSG00000107796|Vega:OTTHUMG00000018700	10q23.31	actin, alpha 2, smooth muscle, aorta	protein-coding
5894	RAF1	CMD1NN|CRAF|NS5|Raf-1|c-Raf	MIM:164760|HGNC:HGNC:9829|Ensembl:ENSG00000132155|Vega:OTTHUMG00000129789	3p25.2	Raf-1 proto-oncogene, serine/threonine kinase	protein-coding
5806	PTX3	TNFAIP5|TSG-14	MIM:602492|HGNC:HGNC:9692|Ensembl:ENSG00000163661|Vega:OTTHUMG00000158750	3q25.32	pentraxin 3	protein-coding
57650	CIP2A	KIAA1524|p90	MIM:610643|HGNC:HGNC:29302|Ensembl:ENSG00000163507|Vega:OTTHUMG00000159233	3q13.13	cell proliferation regulating inhibitor of protein phosphatase 2A	protein-coding
57504	MTA3	-	MIM:609050|HGNC:HGNC:23784|Ensembl:ENSG00000057935|Vega:OTTHUMG00000150452	2p21	metastasis associated 1 family member 3	protein-coding
5744	PTHLH	BDE2|HHM|PLP|PTHR|PTHRP	MIM:168470|HGNC:HGNC:9607|Ensembl:ENSG00000087494|Vega:OTTHUMG00000169221	12p11.22	parathyroid hormone like hormone	protein-coding
57326	PBXIP1	HPIP	HGNC:HGNC:21199|Ensembl:ENSG00000163346|Vega:OTTHUMG00000037369	1q21.3	PBX homeobox interacting protein 1	protein-coding
57144	PAK5	PAK7	MIM:608038|HGNC:HGNC:15916|Ensembl:ENSG00000101349|Vega:OTTHUMG00000031857	20p12.2	p21 (RAC1) activated kinase 5	protein-coding
56998	CTNNBIP1	ICAT	MIM:607758|HGNC:HGNC:16913|Ensembl:ENSG00000178585|Vega:OTTHUMG00000001796	1p36.22	catenin beta interacting protein 1	protein-coding
5653	KLK6	Bssp|Klk7|PRSS18|PRSS9|SP59|hK6	MIM:602652|HGNC:HGNC:6367|Ensembl:ENSG00000167755|Vega:OTTHUMG00000183098	19q13.41	kallikrein related peptidase 6	protein-coding
5652	PRSS8	CAP1|PROSTASIN	MIM:600823|HGNC:HGNC:9491|Ensembl:ENSG00000052344|Vega:OTTHUMG00000176750	16p11.2	protease, serine 8	protein-coding
5626	PROP1	CPHD2|PROP-1	MIM:601538|HGNC:HGNC:9455|Ensembl:ENSG00000175325|Vega:OTTHUMG00000130887	5q35.3	PROP paired-like homeobox 1	protein-coding
5604	MAP2K1	CFC3|MAPKK1|MEK1|MKK1|PRKMK1	MIM:176872|HGNC:HGNC:6840|Ensembl:ENSG00000169032|Vega:OTTHUMG00000133196	15q22.31	mitogen-activated protein kinase kinase 1	protein-coding
55914	ERBIN	ERBB2IP|HEL-S-78|LAP2	MIM:606944|HGNC:HGNC:15842|Ensembl:ENSG00000112851|Vega:OTTHUMG00000097808	5q12.3	erbb2 interacting protein	protein-coding
55727	BTBD7	FUP1	MIM:610386|HGNC:HGNC:18269|Ensembl:ENSG00000011114|Vega:OTTHUMG00000171269	14q32.12	BTB domain containing 7	protein-coding
5562	PRKAA1	AMPK|AMPKa1	MIM:602739|HGNC:HGNC:9376|Ensembl:ENSG00000132356|Vega:OTTHUMG00000162269	5p13.1	protein kinase AMP-activated catalytic subunit alpha 1	protein-coding
55223	TRIM62	DEAR1	MIM:616755|HGNC:HGNC:25574|Ensembl:ENSG00000116525|Vega:OTTHUMG00000004132	1p35.1	tripartite motif containing 62	protein-coding
54778	RNF111	ARK|hRNF111	MIM:605840|HGNC:HGNC:17384|Ensembl:ENSG00000157450|Vega:OTTHUMG00000132716	15q22.1-q22.2	ring finger protein 111	protein-coding
54756	IL17RD	HH18|IL-17RD|IL17RLM|SEF	MIM:606807|HGNC:HGNC:17616|Ensembl:ENSG00000144730|Vega:OTTHUMG00000150171	3p14.3	interleukin 17 receptor D	protein-coding
5329	PLAUR	CD87|U-PAR|UPAR|URKR	MIM:173391|HGNC:HGNC:9053|Ensembl:ENSG00000011422|Vega:OTTHUMG00000182778	19q13.31	plasminogen activator, urokinase receptor	protein-coding
5310	PKD1	PBP|PC1|Pc-1|TRPP1	MIM:601313|HGNC:HGNC:9008|Ensembl:ENSG00000008710|Vega:OTTHUMG00000155795	16p13.3	polycystin 1, transient receptor potential channel interacting	protein-coding
5218	CDK14	PFTAIRE1|PFTK1	MIM:610679|HGNC:HGNC:8883|Ensembl:ENSG00000058091|Vega:OTTHUMG00000023649	7q21.13	cyclin dependent kinase 14	protein-coding
5217	PFN2	D3S1319E|PFL	MIM:176590|HGNC:HGNC:8882|Ensembl:ENSG00000070087|Vega:OTTHUMG00000159683	3q25.1	profilin 2	protein-coding
51684	SUFU	PRO1280|SUFUH|SUFUXL	MIM:607035|HGNC:HGNC:16466|Ensembl:ENSG00000107882|Vega:OTTHUMG00000018966	10q24.32	SUFU negative regulator of hedgehog signaling	protein-coding
51561	IL23A	IL-23|IL-23A|IL23P19|P19|SGRF	MIM:605580|HGNC:HGNC:15488|Ensembl:ENSG00000110944|Vega:OTTHUMG00000187402	12q13.3	interleukin 23 subunit alpha	protein-coding
51438	MAGEC2	CT10|HCA587|MAGEE1	MIM:300468|HGNC:HGNC:13574|Ensembl:ENSG00000046774|Vega:OTTHUMG00000022574	Xq27.2	MAGE family member C2	protein-coding
51361	HOOK1	HK1	MIM:607820|HGNC:HGNC:19884|Ensembl:ENSG00000134709|Vega:OTTHUMG00000008990	1p32.1	hook microtubule tethering protein 1	protein-coding
5133	PDCD1	CD279|PD-1|PD1|SLEB2|hPD-1|hPD-l|hSLE1	MIM:600244|HGNC:HGNC:8760|Ensembl:ENSG00000188389|Vega:OTTHUMG00000151342	2q37.3	programmed cell death 1	protein-coding
51232	CRIM1	CRIM-1|S52	MIM:606189|HGNC:HGNC:2359|Ensembl:ENSG00000150938|Vega:OTTHUMG00000099419	2p22.2	cysteine rich transmembrane BMP regulator 1	protein-coding
51162	EGFL7	NEU1|VE-STATIN|ZNEU1	MIM:608582|HGNC:HGNC:20594|Ensembl:ENSG00000172889|Vega:OTTHUMG00000020938	9q34.3	EGF like domain multiple 7	protein-coding
5093	PCBP1	HEL-S-85|HNRPE1|HNRPX|hnRNP-E1|hnRNP-X	MIM:601209|HGNC:HGNC:8647|Ensembl:ENSG00000169564|Vega:OTTHUMG00000129645	2p13.3	poly(rC) binding protein 1	protein-coding
50848	F11R	CD321|JAM|JAM1|JAMA|JCAM|KAT|PAM-1	MIM:605721|HGNC:HGNC:14685|Ensembl:ENSG00000158769|Vega:OTTHUMG00000028602	1q23.3	F11 receptor	protein-coding
5054	SERPINE1	PAI|PAI-1|PAI1|PLANH1	MIM:173360|HGNC:HGNC:8583|Ensembl:ENSG00000106366|Vega:OTTHUMG00000157107	7q22.1	serpin family E member 1	protein-coding
5045	FURIN	FUR|PACE|PCSK3|SPC1	MIM:136950|HGNC:HGNC:8568|Ensembl:ENSG00000140564|Vega:OTTHUMG00000149831	15q26.1	furin, paired basic amino acid cleaving enzyme	protein-coding
5037	PEBP1	HCNP|HCNPpp|HEL-210|HEL-S-34|HEL-S-96|PBP|PEBP|PEBP-1|RKIP	MIM:604591|HGNC:HGNC:8630|Ensembl:ENSG00000089220|Vega:OTTHUMG00000168860	12q24.23	phosphatidylethanolamine binding protein 1	protein-coding
5029	P2RY2	HP2U|P2RU1|P2U|P2U1|P2UR|P2Y2|P2Y2R	MIM:600041|HGNC:HGNC:8541|Ensembl:ENSG00000175591|Vega:OTTHUMG00000167966	11q13.4	purinergic receptor P2Y2	protein-coding
4792	NFKBIA	IKBA|MAD-3|NFKBI	MIM:164008|HGNC:HGNC:7797|Ensembl:ENSG00000100906|Vega:OTTHUMG00000140220	14q13.2	NFKB inhibitor alpha	protein-coding
4763	NF1	NFNS|VRNF|WSS	MIM:613113|HGNC:HGNC:7765|Ensembl:ENSG00000196712|Vega:OTTHUMG00000132871	17q11.2	neurofibromin 1	protein-coding
4691	NCL	C23|Nsr1	MIM:164035|HGNC:HGNC:7667|Ensembl:ENSG00000115053|Vega:OTTHUMG00000153866	2q37.1	nucleolin	protein-coding
4680	CEACAM6	CD66c|CEAL|NCA	MIM:163980|HGNC:HGNC:1818|Ensembl:ENSG00000086548|Vega:OTTHUMG00000151064	19q13.2	carcinoembryonic antigen related cell adhesion molecule 6	protein-coding
4314	MMP3	CHDS6|MMP-3|SL-1|STMY|STMY1|STR1	MIM:185250|HGNC:HGNC:7173|Ensembl:ENSG00000149968|Vega:OTTHUMG00000048254	11q22.2	matrix metallopeptidase 3	protein-coding
4312	MMP1	CLG|CLGN	MIM:120353|HGNC:HGNC:7155|Ensembl:ENSG00000196611|Vega:OTTHUMG00000048192	11q22.2	matrix metallopeptidase 1	protein-coding
429	ASCL1	ASH1|HASH1|MASH1|bHLHa46	MIM:100790|HGNC:HGNC:738|Ensembl:ENSG00000139352|Vega:OTTHUMG00000169967	12q23.2	achaete-scute family bHLH transcription factor 1	protein-coding
4248	MGAT3	GNT-III|GNT3	MIM:604621|HGNC:HGNC:7046|Ensembl:ENSG00000128268|Vega:OTTHUMG00000030185	22q13.1	mannosyl (beta-1,4-)-glycoprotein beta-1,4-N-acetylglucosaminyltransferase	protein-coding
4192	MDK	ARAP|MK|NEGF2	MIM:162096|HGNC:HGNC:6972|Ensembl:ENSG00000110492|Vega:OTTHUMG00000150315	11p11.2	midkine (neurite growth-promoting factor 2)	protein-coding
4170	MCL1	BCL2L3|EAT|MCL1-ES|MCL1L|MCL1S|Mcl-1|TM|bcl2-L-3|mcl1/EAT	MIM:159552|HGNC:HGNC:6943|Ensembl:ENSG00000143384|Vega:OTTHUMG00000034867	1q21.2	MCL1, BCL2 family apoptosis regulator	protein-coding
4000	LMNA	CDCD1|CDDC|CMD1A|CMT2B1|EMD2|FPL|FPLD|FPLD2|HGPS|IDC|LDP1|LFP|LGMD1B|LMN1|LMNC|LMNL1|MADA|PRO1	MIM:150330|HGNC:HGNC:6636|Ensembl:ENSG00000160789|Vega:OTTHUMG00000013961	1q22	lamin A/C	protein-coding
3958	LGALS3	CBP35|GAL3|GALBP|GALIG|L31|LGALS2|MAC2	MIM:153619|HGNC:HGNC:6563|Ensembl:ENSG00000131981|Vega:OTTHUMG00000171030	14q22.3	galectin 3	protein-coding
3927	LASP1	Lasp-1|MLN50	MIM:602920|HGNC:HGNC:6513|Ensembl:ENSG00000002834|Vega:OTTHUMG00000133182	17q12	LIM and SH3 protein 1	protein-coding
3911	LAMA5	-	MIM:601033|HGNC:HGNC:6485|Ensembl:ENSG00000130702|Vega:OTTHUMG00000032908	20q13.33	laminin subunit alpha 5	protein-coding
3815	KIT	C-Kit|CD117|PBT|SCFR	MIM:164920|HGNC:HGNC:6342|Ensembl:ENSG00000157404|Vega:OTTHUMG00000128713	4q12	KIT proto-oncogene receptor tyrosine kinase	protein-coding
3732	CD82	4F9|C33|GR15|IA4|KAI1|R2|SAR2|ST6|TSPAN27	MIM:600623|HGNC:HGNC:6210|Ensembl:ENSG00000085117|Vega:OTTHUMG00000166472	11p11.2	CD82 molecule	protein-coding
3720	JARID2	JMJ	MIM:601594|HGNC:HGNC:6196|Ensembl:ENSG00000008083|Vega:OTTHUMG00000014293	6p22.3	jumonji and AT-rich interaction domain containing 2	protein-coding
3691	ITGB4	CD104|GP150	MIM:147557|HGNC:HGNC:6158|Ensembl:ENSG00000132470|Vega:OTTHUMG00000179814	17q25.1	integrin subunit beta 4	protein-coding
3675	ITGA3	CD49C|FRP-2|GAP-B3|GAPB3|ILNEB|MSK18|VCA-2|VL3A|VLA3a	MIM:605025|HGNC:HGNC:6139|Ensembl:ENSG00000005884|Vega:OTTHUMG00000161890	17q21.33	integrin subunit alpha 3	protein-coding
3673	ITGA2	BR|CD49B|GPIa|HPA-5|VLA-2|VLAA2	MIM:192974|HGNC:HGNC:6137|Ensembl:ENSG00000164171|Vega:OTTHUMG00000131165	5q11.2	integrin subunit alpha 2	protein-coding
362	AQP5	AQP-5|PPKB	MIM:600442|HGNC:HGNC:638|Ensembl:ENSG00000161798|Vega:OTTHUMG00000169710	12q13.12	aquaporin 5	protein-coding
360	AQP3	AQP-3|GIL	MIM:600170|HGNC:HGNC:636|Ensembl:ENSG00000165272|Vega:OTTHUMG00000019769	9p13.3	aquaporin 3 (Gill blood group)	protein-coding
3589	IL11	AGIF|IL-11	MIM:147681|HGNC:HGNC:5966|Ensembl:ENSG00000095752|Vega:OTTHUMG00000180789	19q13.42	interleukin 11	protein-coding
3579	CXCR2	CD182|CDw128b|CMKAR2|IL8R2|IL8RA|IL8RB	MIM:146928|HGNC:HGNC:6027|Ensembl:ENSG00000180871|Vega:OTTHUMG00000133107	2q35	C-X-C motif chemokine receptor 2	protein-coding
346389	MACC1	7A5|SH3BP4L	MIM:612646|HGNC:HGNC:30215|Ensembl:ENSG00000183742|Vega:OTTHUMG00000128415	7p21.1	MACC1, MET transcriptional regulator	protein-coding
3371	TNC	150-225|DFNA56|GMEM|GP|HXB|JI|TN|TN-C	MIM:187380|HGNC:HGNC:5318|Ensembl:ENSG00000041982|Vega:OTTHUMG00000021010	9q33.1	tenascin C	protein-coding
3280	HES1	HES-1|HHL|HRY|bHLHb39	MIM:139605|HGNC:HGNC:5192|Ensembl:ENSG00000114315|Vega:OTTHUMG00000155984	3q29	hes family bHLH transcription factor 1	protein-coding
3276	PRMT1	ANM1|HCP1|HRMT1L2|IR1B4	MIM:602950|HGNC:HGNC:5187|Ensembl:ENSG00000126457|Vega:OTTHUMG00000167568	19q13.33	protein arginine methyltransferase 1	protein-coding
3265	HRAS	C-BAS/HAS|C-H-RAS|C-HA-RAS1|CTLO|H-RASIDX|HAMSV|HRAS1|RASH1|p21ras	MIM:190020|HGNC:HGNC:5173|Ensembl:ENSG00000174775|Vega:OTTHUMG00000131919	11p15.5	HRas proto-oncogene, GTPase	protein-coding
3219	HOXB9	HOX-2.5|HOX2|HOX2E	MIM:142964|HGNC:HGNC:5120|Ensembl:ENSG00000170689|Vega:OTTHUMG00000159907	17q21.32	homeobox B9	protein-coding
3206	HOXA10	HOX1|HOX1.8|HOX1H|PL	MIM:142957|HGNC:HGNC:5100|Ensembl:ENSG00000253293|Vega:OTTHUMG00000023436	7p15.2	homeobox A10	protein-coding
3149	HMGB3	HMG-2a|HMG-4|HMG2A|HMG4	MIM:300193|HGNC:HGNC:5004|Ensembl:ENSG00000029993|Vega:OTTHUMG00000024162	Xq28	high mobility group box 3	protein-coding
3090	HIC1	ZBTB29|ZNF901|hic-1	MIM:603825|HGNC:HGNC:4909|Ensembl:ENSG00000177374|Vega:OTTHUMG00000177635	17p13.3	HIC ZBTB transcriptional repressor 1	protein-coding
3066	HDAC2	HD2|RPD3|YAF1	MIM:605164|HGNC:HGNC:4853|Ensembl:ENSG00000196591|Vega:OTTHUMG00000015411	6q21	histone deacetylase 2	protein-coding
3014	H2AFX	H2A.X|H2A/X|H2AX	MIM:601772|HGNC:HGNC:4739|Ensembl:ENSG00000188486|Vega:OTTHUMG00000166196	11q23.3	H2A histone family member X	protein-coding
2934	GSN	ADF|AGEL	MIM:137350|HGNC:HGNC:4620|Ensembl:ENSG00000148180|Vega:OTTHUMG00000020584	9q33.2	gelsolin	protein-coding
29128	UHRF1	ICBP90|Np95|RNF106|TDRD22|hNP95|hUHRF1|huNp95	MIM:607990|HGNC:HGNC:12556|Ensembl:ENSG00000276043|Vega:OTTHUMG00000180251	19p13.3	ubiquitin like with PHD and ring finger domains 1	protein-coding
28996	HIPK2	PRO0593	MIM:606868|HGNC:HGNC:14402|Ensembl:ENSG00000064393|Vega:OTTHUMG00000157704	7q34	homeodomain interacting protein kinase 2	protein-coding
2896	GRN	CLN11|GEP|GP88|PCDGF|PEPI|PGRN	MIM:138945|HGNC:HGNC:4601|Ensembl:ENSG00000030582|Vega:OTTHUMG00000181816	17q21.31	granulin precursor	protein-coding
2854	GPR32	RVDR1	MIM:603195|HGNC:HGNC:4487|Ensembl:ENSG00000142511|Vega:OTTHUMG00000183079	19q13.33	G protein-coupled receptor 32	protein-coding
283	ANG	ALS9|HEL168|RAA1|RNASE4|RNASE5	MIM:105850|HGNC:HGNC:483|Ensembl:ENSG00000214274|Vega:OTTHUMG00000029576	14q11.2	angiogenin	protein-coding
2736	GLI2	CJS|HPE9|PHS2|THP1|THP2	MIM:165230|HGNC:HGNC:4318|Ensembl:ENSG00000074047|Vega:OTTHUMG00000153741	2q14.2	GLI family zinc finger 2	protein-coding
2705	GJB1	CMTX|CMTX1|CX32	MIM:304040|HGNC:HGNC:4283|Ensembl:ENSG00000169562|Vega:OTTHUMG00000021797	Xq13.1	gap junction protein beta 1	protein-coding
27035	NOX1	GP91-2|MOX1|NOH-1|NOH1	MIM:300225|HGNC:HGNC:7889|Ensembl:ENSG00000007952|Vega:OTTHUMG00000022007	Xq22.1	NADPH oxidase 1	protein-coding
26018	LRIG1	LIG-1|LIG1	MIM:608868|HGNC:HGNC:17360|Ensembl:ENSG00000144749|Vega:OTTHUMG00000158727	3p14.1	leucine rich repeats and immunoglobulin like domains 1	protein-coding
25800	SLC39A6	LIV-1|ZIP6	MIM:608731|HGNC:HGNC:18607|Ensembl:ENSG00000141424|Vega:OTTHUMG00000178965	18q12.2	solute carrier family 39 member 6	protein-coding
2535	FZD2	Fz2|fz-2|fzE2|hFz2	MIM:600667|HGNC:HGNC:4040|Ensembl:ENSG00000180340|Vega:OTTHUMG00000181819	17q21.31	frizzled class receptor 2	protein-coding
2526	FUT4	CD15|ELFT|FCT3A|FUC-TIV|FUTIV|LeX|SSEA-1	MIM:104230|HGNC:HGNC:4015|Ensembl:ENSG00000196371|Vega:OTTHUMG00000167795	11q21	fucosyltransferase 4	protein-coding
23476	BRD4	CAP|HUNK1|HUNKI|MCAP	MIM:608749|HGNC:HGNC:13575|Ensembl:ENSG00000141867|Vega:OTTHUMG00000183252	19p13.12	bromodomain containing 4	protein-coding
23410	SIRT3	SIR2L3	MIM:604481|HGNC:HGNC:14931|Ensembl:ENSG00000142082|Vega:OTTHUMG00000119074	11p15.5	sirtuin 3	protein-coding
23405	DICER1	DCR1|Dicer|Dicer1e|HERNA|K12H4.8-LIKE|MNG1|RMSE2	MIM:606241|HGNC:HGNC:17098|Ensembl:ENSG00000100697|Vega:OTTHUMG00000166134	14q32.13	dicer 1, ribonuclease III	protein-coding
23314	SATB2	GLSS	MIM:608148|HGNC:HGNC:21637|Ensembl:ENSG00000119042|Vega:OTTHUMG00000132767	2q33.1	SATB homeobox 2	protein-coding
23246	BOP1	-	MIM:610596|HGNC:HGNC:15519|Ensembl:ENSG00000261236|Vega:OTTHUMG00000174603	8q24.3	block of proliferation 1	protein-coding
23136	EPB41L3	4.1B|DAL-1|DAL1	MIM:605331|HGNC:HGNC:3380|Ensembl:ENSG00000082397|Vega:OTTHUMG00000131562	18p11.31	erythrocyte membrane protein band 4.1 like 3	protein-coding
23030	KDM4B	JMJD2B|TDRD14B	MIM:609765|HGNC:HGNC:29136|Ensembl:ENSG00000127663|Vega:OTTHUMG00000180281	19p13.3	lysine demethylase 4B	protein-coding
2254	FGF9	FGF-9|GAF|HBFG-9|HBGF-9|SYNS3	MIM:600921|HGNC:HGNC:3687|Ensembl:ENSG00000102678|Vega:OTTHUMG00000017412	13q12.11	fibroblast growth factor 9	protein-coding
2246	FGF1	AFGF|ECGF|ECGF-beta|ECGFA|ECGFB|FGF-1|FGF-alpha|FGFA|GLIO703|HBGF-1|HBGF1	MIM:131220|HGNC:HGNC:3665|Ensembl:ENSG00000113578|Vega:OTTHUMG00000059703	5q31.3	fibroblast growth factor 1	protein-coding
2118	ETV4	E1A-F|E1AF|PEA3|PEAS3	MIM:600711|HGNC:HGNC:3493|Ensembl:ENSG00000175832|Vega:OTTHUMG00000180884	17q21.31	ETS variant 4	protein-coding
2101	ESRRA	ERR1|ERRa|ERRalpha|ESRL1|NR3B1	MIM:601998|HGNC:HGNC:3471|Ensembl:ENSG00000173153|Vega:OTTHUMG00000150641	11q13.1	estrogen related receptor alpha	protein-coding
2100	ESR2	ER-BETA|ESR-BETA|ESRB|ESTRB|Erb|NR3A2	MIM:601663|HGNC:HGNC:3468|Ensembl:ENSG00000140009|Vega:OTTHUMG00000141306	14q23.2-q23.3	estrogen receptor 2	protein-coding
2078	ERG	erg-3|p55	MIM:165080|HGNC:HGNC:3446|Ensembl:ENSG00000157554|Vega:OTTHUMG00000090767	21q22.2	ERG, ETS transcription factor	protein-coding
2059	EPS8	DFNB102	MIM:600206|HGNC:HGNC:3420|Ensembl:ENSG00000151491|Vega:OTTHUMG00000168787	12p12.3	epidermal growth factor receptor pathway substrate 8	protein-coding
2056	EPO	EP|MVCD2	MIM:133170|HGNC:HGNC:3415|Ensembl:ENSG00000130427|Vega:OTTHUMG00000152121	7q22.1	erythropoietin	protein-coding
2048	EPHB2	CAPB|DRT|EK5|EPHT3|ERK|Hek5|PCBC|Tyro5	MIM:600997|HGNC:HGNC:3393|Ensembl:ENSG00000133216|Vega:OTTHUMG00000002881	1p36.12	EPH receptor B2	protein-coding
200504	GKN2	BRICD1B|GDDR|PRO813|TFIZ1|VLTI465	HGNC:HGNC:24588|Ensembl:ENSG00000183607|Vega:OTTHUMG00000152655	2p13.3	gastrokine 2	protein-coding
200424	TET3	hCG_40738	MIM:613555|HGNC:HGNC:28313|Ensembl:ENSG00000187605|Vega:OTTHUMG00000152823	2p13.1	tet methylcytosine dioxygenase 3	protein-coding
196	AHR	bHLHe76	MIM:600253|HGNC:HGNC:348|Ensembl:ENSG00000106546|Ensembl:ENSG00000283321|Vega:OTTHUMG00000149967|Vega:OTTHUMG00000191686	7p21.1	aryl hydrocarbon receptor	protein-coding
1869	E2F1	E2F-1|RBAP1|RBBP3|RBP3	MIM:189971|HGNC:HGNC:3113|Ensembl:ENSG00000101412|Vega:OTTHUMG00000032265	20q11.22	E2F transcription factor 1	protein-coding
1839	HBEGF	DTR|DTS|DTSF|HEGFL	MIM:126150|HGNC:HGNC:3059|Ensembl:ENSG00000113070|Vega:OTTHUMG00000129496	5q31.3	heparin binding EGF like growth factor	protein-coding
1748	DLX4	BP1|DLX7|DLX8|DLX9|OFC15	MIM:601911|HGNC:HGNC:2917|Ensembl:ENSG00000108813|Vega:OTTHUMG00000161839	17q21.33	distal-less homeobox 4	protein-coding
153090	DAB2IP	AF9Q34|AIP-1|AIP1|DIP1/2	MIM:609205|HGNC:HGNC:17294|Ensembl:ENSG00000136848|Vega:OTTHUMG00000020595	9q33.2	DAB2 interacting protein	protein-coding
152559	PAQR3	RKTG	MIM:614577|HGNC:HGNC:30130|Ensembl:ENSG00000163291|Vega:OTTHUMG00000161026	4q21.21	progestin and adipoQ receptor family member 3	protein-coding
1522	CTSZ	CTSX	MIM:603169|HGNC:HGNC:2547|Ensembl:ENSG00000101160|Vega:OTTHUMG00000032858	20q13.32	cathepsin Z	protein-coding
152007	GLIPR2	C9orf19|GAPR-1|GAPR1	MIM:607141|HGNC:HGNC:18007|Ensembl:ENSG00000122694|Vega:OTTHUMG00000019900	9p13.3	GLI pathogenesis related 2	protein-coding
148867	SLC30A7	ZNT7|ZnT-7|ZnTL2	MIM:611149|HGNC:HGNC:19306|Ensembl:ENSG00000162695|Vega:OTTHUMG00000011815	1p21.2	solute carrier family 30 member 7	protein-coding
146713	RBFOX3	FOX-3|FOX3|HRNBP3|NEUN	MIM:616999|HGNC:HGNC:27097|Ensembl:ENSG00000167281|Vega:OTTHUMG00000150183	17q25.3	RNA binding protein, fox-1 homolog 3	protein-coding
1460	CSNK2B	CK2B|CK2N|CSK2B|Ckb1|Ckb2|G5A	MIM:115441|HGNC:HGNC:2460|Ensembl:ENSG00000204435|Vega:OTTHUMG00000177888	6p21.33	casein kinase 2 beta	protein-coding
1410	CRYAB	CMD1II|CRYA2|CTPP2|CTRCT16|HEL-S-101|HSPB5|MFM2	MIM:123590|HGNC:HGNC:2389|Ensembl:ENSG00000109846|Vega:OTTHUMG00000166885	11q23.1	crystallin alpha B	protein-coding
1398	CRK	CRKII|p38	MIM:164762|HGNC:HGNC:2362|Ensembl:ENSG00000167193|Vega:OTTHUMG00000090317	17p13.3	CRK proto-oncogene, adaptor protein	protein-coding
1385	CREB1	CREB|CREB-1	MIM:123810|HGNC:HGNC:2345|Ensembl:ENSG00000118260|Vega:OTTHUMG00000132936	2q33.3	cAMP responsive element binding protein 1	protein-coding
1366	CLDN7	CEPTRL2|CLDN-7|CPETRL2|Hs.84359|claudin-1	MIM:609131|HGNC:HGNC:2049|Ensembl:ENSG00000181885|Vega:OTTHUMG00000178005	17p13.1	claudin 7	protein-coding
1364	CLDN4	CPE-R|CPER|CPETR|CPETR1|WBSCR8|hCPE-R	MIM:602909|HGNC:HGNC:2046|Ensembl:ENSG00000189143|Vega:OTTHUMG00000023425	7q11.23	claudin 4	protein-coding
1191	CLU	AAG4|APO-J|APOJ|CLI|CLU1|CLU2|KUB1|NA1/NA2|SGP-2|SGP2|SP-40|TRPM-2|TRPM2	MIM:185430|HGNC:HGNC:2095|Ensembl:ENSG00000120885|Vega:OTTHUMG00000102114	8p21.1	clusterin	protein-coding
115426	UHRF2	NIRF|RNF107|TDRD23|URF2	MIM:615211|HGNC:HGNC:12557|Ensembl:ENSG00000147854|Vega:OTTHUMG00000019521	9p24.1	ubiquitin like with PHD and ring finger domains 2	protein-coding
10919	EHMT2	BAT8|C6orf30|G9A|GAT8|KMT1C|NG36	MIM:604599|HGNC:HGNC:14129|Ensembl:ENSG00000204371|Vega:OTTHUMG00000031180	6p21.33	euchromatic histone lysine methyltransferase 2	protein-coding
10887	PROKR1	GPR73|GPR73a|PK-R1|PKR1|ZAQ	MIM:607122|HGNC:HGNC:4524|Ensembl:ENSG00000169618|Ensembl:ENSG00000169621|Vega:OTTHUMG00000129567	2p13.3	prokineticin receptor 1	protein-coding
10810	WASF3	Brush-1|SCAR3|WAVE3	MIM:605068|HGNC:HGNC:12734|Ensembl:ENSG00000132970|Vega:OTTHUMG00000016621	13q12.13	WAS protein family member 3	protein-coding
1080	CFTR	ABC35|ABCC7|CF|CFTR/MRP|MRP7|TNR-CFTR|dJ760C5.1	MIM:602421|HGNC:HGNC:1884|Ensembl:ENSG00000001626|Vega:OTTHUMG00000023076	7q31.2	cystic fibrosis transmembrane conductance regulator	protein-coding
10657	KHDRBS1	Sam68|p62|p68	MIM:602489|HGNC:HGNC:18116|Ensembl:ENSG00000121774|Vega:OTTHUMG00000003921	1p35.2	KH RNA binding domain containing, signal transduction associated 1	protein-coding
10626	TRIM16	EBBP	MIM:609505|HGNC:HGNC:17241|Ensembl:ENSG00000221926|Vega:OTTHUMG00000059067	17p12	tripartite motif containing 16	protein-coding
1051	CEBPB	C/EBP-beta|IL6DBP|NF-IL6|TCF5	MIM:189965|HGNC:HGNC:1834|Ensembl:ENSG00000172216|Vega:OTTHUMG00000032715	20q13.13	CCAAT/enhancer binding protein beta	protein-coding
1050	CEBPA	C/EBP-alpha|CEBP	MIM:116897|HGNC:HGNC:1833|Ensembl:ENSG00000245848|Vega:OTTHUMG00000161461	19q13.11	CCAAT/enhancer binding protein alpha	protein-coding
10481	HOXB13	PSGD	MIM:604607|HGNC:HGNC:5112|Ensembl:ENSG00000159184|Vega:OTTHUMG00000159900	17q21.32	homeobox B13	protein-coding
10460	TACC3	ERIC-1|ERIC1	MIM:605303|HGNC:HGNC:11524|Ensembl:ENSG00000013810|Vega:OTTHUMG00000089535	4p16.3	transforming acidic coiled-coil containing protein 3	protein-coding
1045	CDX2	CDX-3|CDX2/AS|CDX3	MIM:600297|HGNC:HGNC:1806|Ensembl:ENSG00000165556|Vega:OTTHUMG00000016640	13q12.2	caudal type homeobox 2	protein-coding
10447	FAM3C	GS3786|ILEI	MIM:608618|HGNC:HGNC:18664|Ensembl:ENSG00000196937|Vega:OTTHUMG00000156979	7q31.31	family with sequence similarity 3 member C	protein-coding
1029	CDKN2A	ARF|CDK4I|CDKN2|CMM2|INK4|INK4A|MLM|MTS-1|MTS1|P14|P14ARF|P16|P16-INK4A|P16INK4|P16INK4A|P19|P19ARF|TP16	MIM:600160|HGNC:HGNC:1787|Ensembl:ENSG00000147889|Vega:OTTHUMG00000019686	9p21.3	cyclin dependent kinase inhibitor 2A	protein-coding
1020	CDK5	LIS7|PSSALRE	MIM:123831|HGNC:HGNC:1774|Ensembl:ENSG00000164885|Vega:OTTHUMG00000158414	7q36.1	cyclin dependent kinase 5	protein-coding
9965	FGF19	-	MIM:603891|HGNC:HGNC:3675|Ensembl:ENSG00000162344|Vega:OTTHUMG00000167886	11q13.3	fibroblast growth factor 19	protein-coding
9939	RBM8A	BOV-1A|BOV-1B|BOV-1C|C1DELq21.1|DEL1q21.1|MDS014|RBM8|RBM8B|TAR|Y14|ZNRP|ZRNP1	MIM:605313|HGNC:HGNC:9905|Ensembl:ENSG00000265241|Vega:OTTHUMG00000013736	1q21.1	RNA binding motif protein 8A	protein-coding
9902	MRC2	CD280|CLEC13E|ENDO180|UPARAP	MIM:612264|HGNC:HGNC:16875|Ensembl:ENSG00000011028|Vega:OTTHUMG00000179178	17q23.2	mannose receptor C type 2	protein-coding
9846	GAB2	-	MIM:606203|HGNC:HGNC:14458|Ensembl:ENSG00000033327|Vega:OTTHUMG00000166673	11q14.1	GRB2 associated binding protein 2	protein-coding
977	CD151	GP27|MER2|PETA-3|RAPH|SFA1|TSPAN24	MIM:602243|HGNC:HGNC:1630|Ensembl:ENSG00000177697|Vega:OTTHUMG00000133311	11p15.5	CD151 molecule (Raph blood group)	protein-coding
9734	HDAC9	HD7|HD7b|HD9|HDAC|HDAC7|HDAC7B|HDAC9B|HDAC9FL|HDRP|MITR	MIM:606543|HGNC:HGNC:14065|Ensembl:ENSG00000048052|Vega:OTTHUMG00000152487	7p21.1	histone deacetylase 9	protein-coding
9723	SEMA3E	M-SEMAH|M-SemaK|SEMAH|coll-5	MIM:608166|HGNC:HGNC:10727|Ensembl:ENSG00000170381|Vega:OTTHUMG00000154693	7q21.11	semaphorin 3E	protein-coding
9686	VGLL4	VGL-4	HGNC:HGNC:28966|Ensembl:ENSG00000144560|Vega:OTTHUMG00000129739	3p25.3-p25.2	vestigial like family member 4	protein-coding
967	CD63	LAMP-3|ME491|MLA1|OMA81H|TSPAN30	MIM:155740|HGNC:HGNC:1692|Ensembl:ENSG00000135404|Vega:OTTHUMG00000170454	12q13.2	CD63 molecule	protein-coding
9645	MICAL2	MICAL-2|MICAL2PV1|MICAL2PV2	MIM:608881|HGNC:HGNC:24693|Ensembl:ENSG00000133816|Vega:OTTHUMG00000165744	11p15.3	microtubule associated monooxygenase, calponin and LIM domain containing 2	protein-coding
9636	ISG15	G1P2|IFI15|IMD38|IP17|UCRP|hUCRP	MIM:147571|HGNC:HGNC:4053|Ensembl:ENSG00000187608|Vega:OTTHUMG00000040777	1p36.33	ISG15 ubiquitin-like modifier	protein-coding
9600	PITPNM1	DRES9|NIR2|PITPNM|RDGB|RDGB1|RDGBA|RDGBA1|Rd9	MIM:608794|HGNC:HGNC:9003|Ensembl:ENSG00000110697|Vega:OTTHUMG00000167675	11q13.2	phosphatidylinositol transfer protein membrane associated 1	protein-coding
9547	CXCL14	BMAC|BRAK|KEC|KS1|MIP-2g|MIP2G|NJAC|SCYB14	MIM:604186|HGNC:HGNC:10640|Ensembl:ENSG00000145824|Vega:OTTHUMG00000129139	5q31.1	C-X-C motif chemokine ligand 14	protein-coding
9480	ONECUT2	OC-2|OC2	MIM:604894|HGNC:HGNC:8139|Ensembl:ENSG00000119547|Vega:OTTHUMG00000159776	18q21.31	one cut homeobox 2	protein-coding
9475	ROCK2	ROCK-II	MIM:604002|HGNC:HGNC:10252|Ensembl:ENSG00000134318|Vega:OTTHUMG00000149916	2p25.1	Rho associated coiled-coil containing protein kinase 2	protein-coding
9462	RASAL2	NGAP	MIM:606136|HGNC:HGNC:9874|Ensembl:ENSG00000075391|Vega:OTTHUMG00000035022	1q25.2	RAS protein activator like 2	protein-coding
9451	EIF2AK3	PEK|PERK|WRS	MIM:604032|HGNC:HGNC:3255|Ensembl:ENSG00000172071|Vega:OTTHUMG00000155046	2p11.2	eukaryotic translation initiation factor 2 alpha kinase 3	protein-coding
9448	MAP4K4	FLH21957|HEL-S-31|HGK|MEKKK4|NIK	MIM:604666|HGNC:HGNC:6866|Ensembl:ENSG00000071054|Vega:OTTHUMG00000155394	2q11.2	mitogen-activated protein kinase kinase kinase kinase 4	protein-coding
9444	QKI	Hqk|QK|QK1|QK3|hqkI	MIM:609590|HGNC:HGNC:21100|Ensembl:ENSG00000112531|Vega:OTTHUMG00000015977	6q26	QKI, KH domain containing RNA binding	protein-coding
9421	HAND1	Hxt|Thing1|bHLHa27|eHand	MIM:602406|HGNC:HGNC:4807|Ensembl:ENSG00000113196|Vega:OTTHUMG00000130193	5q33.2	heart and neural crest derivatives expressed 1	protein-coding
9420	CYP7B1	CBAS3|CP7B|SPG5A	MIM:603711|HGNC:HGNC:2652|Ensembl:ENSG00000172817|Vega:OTTHUMG00000164387	8q12.3	cytochrome P450 family 7 subfamily B member 1	protein-coding
94025	MUC16	CA125	MIM:606154|HGNC:HGNC:15582|Ensembl:ENSG00000181143|Vega:OTTHUMG00000169191	19p13.2	mucin 16, cell surface associated	protein-coding
93986	FOXP2	CAGH44|SPCH1|TNRC10	MIM:605317|HGNC:HGNC:13875|Ensembl:ENSG00000128573|Vega:OTTHUMG00000023131	7q31.1	forkhead box P2	protein-coding
9372	ZFYVE9	MADHIP|NSP|PPP1R173|SARA|SMADIP	MIM:603755|HGNC:HGNC:6775|Ensembl:ENSG00000157077|Vega:OTTHUMG00000008061	1p32.3	zinc finger FYVE-type containing 9	protein-coding
9368	SLC9A3R1	EBP50|NHERF|NHERF-1|NHERF1|NPHLOP2	MIM:604990|HGNC:HGNC:11075|Ensembl:ENSG00000109062|Vega:OTTHUMG00000178863	17q25.1	SLC9A3 regulator 1	protein-coding
9365	KL	-	MIM:604824|HGNC:HGNC:6344|Ensembl:ENSG00000133116|Vega:OTTHUMG00000017408	13q13.1	klotho	protein-coding
9355	LHX2	LH2|hLhx2	MIM:603759|HGNC:HGNC:6594|Ensembl:ENSG00000106689|Vega:OTTHUMG00000020647	9q33.3	LIM homeobox 2	protein-coding
93185	IGSF8	CD316|CD81P3|EWI-2|EWI2|KCT-4|LIR-D1|PGRL	MIM:606644|HGNC:HGNC:17813|Ensembl:ENSG00000162729|Vega:OTTHUMG00000024075	1q23.2	immunoglobulin superfamily member 8	protein-coding
9315	NREP	C5orf13|D4S114|P311|PRO1873|PTZ17|SEZ17	MIM:607332|HGNC:HGNC:16834|Ensembl:ENSG00000134986|Vega:OTTHUMG00000128795	5q22.1	neuronal regeneration related protein	protein-coding
929	CD14	-	MIM:158120|HGNC:HGNC:1628|Ensembl:ENSG00000170458|Vega:OTTHUMG00000129507	5q31.3	CD14 molecule	protein-coding
9241	NOG	SYM1|SYNS1|SYNS1A	MIM:602991|HGNC:HGNC:7866|Ensembl:ENSG00000183691|Vega:OTTHUMG00000151770	17q22	noggin	protein-coding
9208	LRRFIP1	FLAP-1|FLAP1|FLIIAP1|GCF-2|GCF2|HUFI-1|TRIP	MIM:603256|HGNC:HGNC:6702|Ensembl:ENSG00000124831|Vega:OTTHUMG00000133339	2q37.3	LRR binding FLII interacting protein 1	protein-coding
91862	MARVELD3	MARVD3|MRVLDC3	MIM:614094|HGNC:HGNC:30525|Ensembl:ENSG00000140832|Vega:OTTHUMG00000137591	16q22.2	MARVEL domain containing 3	protein-coding
9181	ARHGEF2	GEF|GEF-H1|GEFH1|LFP40|NEDMHM|P40	MIM:607560|HGNC:HGNC:682|Ensembl:ENSG00000116584|Vega:OTTHUMG00000017464	1q22	Rho/Rac guanine nucleotide exchange factor 2	protein-coding
9126	SMC3	BAM|BMH|CDLS3|CSPG6|HCAP|SMC3L1	MIM:606062|HGNC:HGNC:2468|Ensembl:ENSG00000108055|Vega:OTTHUMG00000019042	10q25.2	structural maintenance of chromosomes 3	protein-coding
9113	LATS1	WARTS|wts	MIM:603473|HGNC:HGNC:6514|Ensembl:ENSG00000131023|Vega:OTTHUMG00000016437	6q25.1	large tumor suppressor kinase 1	protein-coding
9111	NMI	-	MIM:603525|HGNC:HGNC:7854|Ensembl:ENSG00000123609|Vega:OTTHUMG00000131867	2q23.3	N-myc and STAT interactor	protein-coding
9051	PSTPIP1	CD2BP1|CD2BP1L|CD2BP1S|H-PIP|PAPAS|PSTPIP	MIM:606347|HGNC:HGNC:9580|Ensembl:ENSG00000140368|Vega:OTTHUMG00000172594	15q24.3	proline-serine-threonine phosphatase interacting protein 1	protein-coding
9021	SOCS3	ATOD4|CIS3|Cish3|SOCS-3|SSI-3|SSI3	MIM:604176|HGNC:HGNC:19391|Ensembl:ENSG00000184557|Vega:OTTHUMG00000177513	17q25.3	suppressor of cytokine signaling 3	protein-coding
90161	HS6ST2	-	MIM:300545|HGNC:HGNC:19133|Ensembl:ENSG00000171004|Vega:OTTHUMG00000022430	Xq26.2	heparan sulfate 6-O-sulfotransferase 2	protein-coding
901	CCNG2	-	MIM:603203|HGNC:HGNC:1593|Ensembl:ENSG00000138764|Vega:OTTHUMG00000130100	4q21.1	cyclin G2	protein-coding
8999	CDKL2	KKIAMRE|P56	MIM:603442|HGNC:HGNC:1782|Ensembl:ENSG00000138769|Vega:OTTHUMG00000130103	4q21.1	cyclin dependent kinase like 2	protein-coding
8945	BTRC	BETA-TRCP|FBW1A|FBXW1|FBXW1A|FWD1|bTrCP|bTrCP1|betaTrCP	MIM:603482|HGNC:HGNC:1144|Ensembl:ENSG00000166167|Vega:OTTHUMG00000018932	10q24.32	beta-transducin repeat containing E3 ubiquitin protein ligase	protein-coding
894	CCND2	KIAK0002|MPPH3	MIM:123833|HGNC:HGNC:1583|Ensembl:ENSG00000118971|Vega:OTTHUMG00000168123	12p13.32	cyclin D2	protein-coding
8914	TIMELESS	TIM|TIM1|hTIM	MIM:603887|HGNC:HGNC:11813|Ensembl:ENSG00000111602|Vega:OTTHUMG00000170600	12q13.3	timeless circadian clock	protein-coding
8856	NR1I2	BXR|ONR1|PAR|PAR1|PAR2|PARq|PRR|PXR|SAR|SXR	MIM:603065|HGNC:HGNC:7968|Ensembl:ENSG00000144852|Vega:OTTHUMG00000159400	3q13.33	nuclear receptor subfamily 1 group I member 2	protein-coding
8850	KAT2B	CAF|P/CAF|PCAF	MIM:602303|HGNC:HGNC:8638|Ensembl:ENSG00000114166|Vega:OTTHUMG00000130481	3p24.3	lysine acetyltransferase 2B	protein-coding
8821	INPP4B	-	MIM:607494|HGNC:HGNC:6075|Ensembl:ENSG00000109452|Vega:OTTHUMG00000161341	4q31.21	inositol polyphosphate-4-phosphatase type II B	protein-coding
8796	SCEL	-	MIM:604112|HGNC:HGNC:10573|Ensembl:ENSG00000136155|Vega:OTTHUMG00000017107	13q22.3	sciellin	protein-coding
8792	TNFRSF11A	CD265|FEO|LOH18CR1|ODFR|OFE|OPTB7|OSTS|PDB2|RANK|TRANCER	MIM:603499|HGNC:HGNC:11908|Ensembl:ENSG00000141655|Vega:OTTHUMG00000132779	18q21.33	TNF receptor superfamily member 11a	protein-coding
8743	TNFSF10	APO2L|Apo-2L|CD253|TL2|TNLG6A|TRAIL	MIM:603598|HGNC:HGNC:11925|Ensembl:ENSG00000121858|Vega:OTTHUMG00000156917	3q26.31	TNF superfamily member 10	protein-coding
8742	TNFSF12	APO3L|DR3LG|TNLG4A|TWEAK	MIM:602695|HGNC:HGNC:11927|Ensembl:ENSG00000239697|Vega:OTTHUMG00000108148	17p13.1	TNF superfamily member 12	protein-coding
873	CBR1	CBR|SDR21C1|hCBR1	MIM:114830|HGNC:HGNC:1548|Ensembl:ENSG00000159228|Vega:OTTHUMG00000086618	21q22.12	carbonyl reductase 1	protein-coding
8726	EED	COGIS|HEED|WAIT1	MIM:605984|HGNC:HGNC:3188|Ensembl:ENSG00000074266|Vega:OTTHUMG00000167209	11q14.2	embryonic ectoderm development	protein-coding
8714	ABCC3	ABC31|EST90757|MLP2|MOAT-D|MRP3|cMOAT2	MIM:604323|HGNC:HGNC:54|Ensembl:ENSG00000108846|Vega:OTTHUMG00000162245	17q21.33	ATP binding cassette subfamily C member 3	protein-coding
868	CBLB	Cbl-b|Nbla00127|RNF56	MIM:604491|HGNC:HGNC:1542|Ensembl:ENSG00000114423|Vega:OTTHUMG00000150654	3q13.11	Cbl proto-oncogene B	protein-coding
8668	EIF3I	EIF3S2|PRO2242|TRIP-1|TRIP1|eIF3-beta|eIF3-p36	MIM:603911|HGNC:HGNC:3272|Ensembl:ENSG00000084623|Vega:OTTHUMG00000007364	1p35.2	eukaryotic translation initiation factor 3 subunit I	protein-coding
8660	IRS2	IRS-2	MIM:600797|HGNC:HGNC:6126|Ensembl:ENSG00000185950|Vega:OTTHUMG00000017338	13q34	insulin receptor substrate 2	protein-coding
85477	SCIN	-	MIM:613416|HGNC:HGNC:21695|Ensembl:ENSG00000006747|Vega:OTTHUMG00000152385	7p21.3	scinderin	protein-coding
8517	IKBKG	AMCBX1|FIP-3|FIP3|Fip3p|IKK-gamma|IKKAP1|IKKG|IMD33|IP|IP1|IP2|IPD2|NEMO|ZC2HC9	MIM:300248|HGNC:HGNC:5961|Ensembl:ENSG00000269335|Vega:OTTHUMG00000024234	Xq28	inhibitor of nuclear factor kappa B kinase subunit gamma	protein-coding
8503	PIK3R3	p55|p55-GAMMA|p55PIK	MIM:606076|HGNC:HGNC:8981|Ensembl:ENSG00000117461|Ensembl:ENSG00000278139|Vega:OTTHUMG00000008096|Vega:OTTHUMG00000186753	1p34.1	phosphoinositide-3-kinase regulatory subunit 3	protein-coding
84962	AJUBA	JUB	MIM:609066|HGNC:HGNC:20250|Ensembl:ENSG00000129474|Vega:OTTHUMG00000028711	14q11.2	ajuba LIM protein	protein-coding
8493	PPM1D	IDDGIP|PP2C-DELTA|WIP1	MIM:605100|HGNC:HGNC:9277|Ensembl:ENSG00000170836|Vega:OTTHUMG00000180052	17q23.2	protein phosphatase, Mg2+/Mn2+ dependent 1D	protein-coding
8487	GEMIN2	SIP1|SIP1-delta	MIM:602595|HGNC:HGNC:10884|Ensembl:ENSG00000092208|Vega:OTTHUMG00000028816	14q21.1	gem nuclear organelle associated protein 2	protein-coding
84833	USMG5	DAPIT|HCVFTP2|bA792D24.4	MIM:615204|HGNC:HGNC:30889|Ensembl:ENSG00000173915|Vega:OTTHUMG00000018984	10q24.33	up-regulated during skeletal muscle growth 5 homolog (mouse)	protein-coding
8482	SEMA7A	CD108|CDw108|H-SEMA-K1|H-Sema-L|JMH|SEMAK1|SEMAL	MIM:607961|HGNC:HGNC:10741|Ensembl:ENSG00000138623|Vega:OTTHUMG00000139000	15q24.1	semaphorin 7A (John Milton Hagen blood group)	protein-coding
84695	LOXL3	LOXL	MIM:607163|HGNC:HGNC:13869|Ensembl:ENSG00000115318|Vega:OTTHUMG00000129953	2p13.1	lysyl oxidase like 3	protein-coding
84681	HINT2	HIT-17	MIM:609997|HGNC:HGNC:18344|Ensembl:ENSG00000137133|Vega:OTTHUMG00000019886	9p13.3	histidine triad nucleotide binding protein 2	protein-coding
84654	SPZ1	NYD-TSP1|PPP1R148	HGNC:HGNC:30721|Ensembl:ENSG00000164299|Vega:OTTHUMG00000162514	5q14.1	spermatogenic leucine zipper 1	protein-coding
8463	TEAD2	ETF|TEAD-2|TEF-4|TEF4	MIM:601729|HGNC:HGNC:11715|Ensembl:ENSG00000074219|Vega:OTTHUMG00000183174	19q13.33	TEA domain transcription factor 2	protein-coding
8456	FOXN1	FKHL20|RONU|WHN	MIM:600838|HGNC:HGNC:12765|Ensembl:ENSG00000109101|Vega:OTTHUMG00000132603	17q11.2	forkhead box N1	protein-coding
8452	CUL3	CUL-3|PHA2E	MIM:603136|HGNC:HGNC:2553|Ensembl:ENSG00000036257|Vega:OTTHUMG00000133167	2q36.2	cullin 3	protein-coding
84148	KAT8	MOF|MYST1|ZC2HC8|hMOF	MIM:609912|HGNC:HGNC:17933|Ensembl:ENSG00000103510|Vega:OTTHUMG00000132410	16p11.2	lysine acetyltransferase 8	protein-coding
8405	SPOP	BTBD32|TEF2	MIM:602650|HGNC:HGNC:11254|Ensembl:ENSG00000121067|Vega:OTTHUMG00000161496	17q21.33	speckle type BTB/POZ protein	protein-coding
83742	MARVELD1	GB14|MARVD1|MRVLDC1|bA548K23.8	MIM:616970|HGNC:HGNC:28674|Ensembl:ENSG00000155254|Vega:OTTHUMG00000018865	10q24.2	MARVEL domain containing 1	protein-coding
83737	ITCH	ADMFD|AIF4|AIP4|NAPP1	MIM:606409|HGNC:HGNC:13890|Ensembl:ENSG00000078747|Vega:OTTHUMG00000032300	20q11.22	itchy E3 ubiquitin protein ligase	protein-coding
83719	YPEL3	-	MIM:609724|HGNC:HGNC:18327|Ensembl:ENSG00000090238|Vega:OTTHUMG00000176853	16p11.2	yippee like 3	protein-coding
829	CAPZA1	CAPPA1|CAPZ|CAZ1	MIM:601580|HGNC:HGNC:1488|Ensembl:ENSG00000116489|Vega:OTTHUMG00000011769	1p13.2	capping actin protein of muscle Z-line alpha subunit 1	protein-coding
826	CAPNS1	CALPAIN4|CANP|CANPS|CAPN4|CDPS|CSS1	MIM:114170|HGNC:HGNC:1481|Ensembl:ENSG00000126247|Vega:OTTHUMG00000160811	19q13.12	calpain small subunit 1	protein-coding
8243	SMC1A	CDLS2|DXS423E|SB1.8|SMC1|SMC1L1|SMC1alpha|SMCB	MIM:300040|HGNC:HGNC:11111|Ensembl:ENSG00000072501|Vega:OTTHUMG00000021614	Xp11.22	structural maintenance of chromosomes 1A	protein-coding
8239	USP9X	DFFRX|FAF|FAM|MRX99|MRXS99F	MIM:300072|HGNC:HGNC:12632|Ensembl:ENSG00000124486|Vega:OTTHUMG00000021367	Xp11.4	ubiquitin specific peptidase 9, X-linked	protein-coding
81839	VANGL1	KITENIN|LPP2|STB2|STBM2	MIM:610132|HGNC:HGNC:15512|Ensembl:ENSG00000173218|Vega:OTTHUMG00000011971	1p13.1	VANGL planar cell polarity protein 1	protein-coding
81559	TRIM11	BIA1|RNF92	MIM:607868|HGNC:HGNC:16281|Ensembl:ENSG00000154370|Vega:OTTHUMG00000039773	1q42.13	tripartite motif containing 11	protein-coding
81029	WNT5B	-	MIM:606361|HGNC:HGNC:16265|Ensembl:ENSG00000111186|Vega:OTTHUMG00000090375	12p13.33	Wnt family member 5B	protein-coding
8100	IFT88	D13S1056E|DAF19|TG737|TTC10|hTg737	MIM:600595|HGNC:HGNC:20606|Ensembl:ENSG00000032742|Vega:OTTHUMG00000016517	13q12.11	intraflagellar transport 88	protein-coding
80854	SETD7	KMT7|SET7|SET7/9|SET9	MIM:606594|HGNC:HGNC:30412|Ensembl:ENSG00000145391|Vega:OTTHUMG00000133385	4q31.1	SET domain containing lysine methyltransferase 7	protein-coding
8073	PTP4A2	HH13|HH7-2|HU-PP-1|OV-1|PRL-2|PRL2|PTP4A|PTPCAAX2|ptp-IV1a|ptp-IV1b	MIM:601584|HGNC:HGNC:9635|Ensembl:ENSG00000184007|Vega:OTTHUMG00000003801	1p35.2	protein tyrosine phosphatase type IVA, member 2	protein-coding
80306	MED28	1500003D12Rik|EG1|magicin	MIM:610311|HGNC:HGNC:24628|Ensembl:ENSG00000118579|Vega:OTTHUMG00000161980	4p15.32	mediator complex subunit 28	protein-coding
80237	ELL3	-	MIM:609885|HGNC:HGNC:23113|Ensembl:ENSG00000128886|Vega:OTTHUMG00000059936	15q15.3	elongation factor for RNA polymerase II 3	protein-coding
80224	NUBPL	C14orf127|IND1|huInd1	MIM:613621|HGNC:HGNC:20278|Ensembl:ENSG00000151413|Vega:OTTHUMG00000170521	14q12	nucleotide binding protein like	protein-coding
80204	FBXO11	FBX11|PRMT9|UBR6|UG063H01|VIT1	MIM:607871|HGNC:HGNC:13590|Ensembl:ENSG00000138081|Vega:OTTHUMG00000129130	2p16.3	F-box protein 11	protein-coding
79778	MICALL2	JRAB|MICAL-L2	HGNC:HGNC:29672|Ensembl:ENSG00000164877|Vega:OTTHUMG00000119021	7p22.3	MICAL like 2	protein-coding
79727	LIN28A	CSDD1|LIN-28|LIN28|ZCCHC1|lin-28A	MIM:611043|HGNC:HGNC:15986|Ensembl:ENSG00000131914|Vega:OTTHUMG00000003550	1p36.11	lin-28 homolog A	protein-coding
79054	TRPM8	LTRPC6|TRPP8	MIM:606678|HGNC:HGNC:17961|Ensembl:ENSG00000144481|Vega:OTTHUMG00000059129	2q37.1	transient receptor potential cation channel subfamily M member 8	protein-coding
780	DDR1	CAK|CD167|DDR|EDDR1|HGK2|MCK10|NEP|NTRK4|PTK3|PTK3A|RTK6|TRKE	MIM:600408|HGNC:HGNC:2730|Ensembl:ENSG00000204580|Vega:OTTHUMG00000031236	6p21.33	discoidin domain receptor tyrosine kinase 1	protein-coding
7791	ZYX	ESP-2|HED-2	MIM:602002|HGNC:HGNC:13200|Ensembl:ENSG00000159840|Vega:OTTHUMG00000023822	7q34	zyxin	protein-coding
7764	ZNF217	ZABC1	MIM:602967|HGNC:HGNC:13009|Ensembl:ENSG00000171940|Vega:OTTHUMG00000032764	20q13.2	zinc finger protein 217	protein-coding
7703	PCGF2	MEL-18|RNF110|ZNF144	MIM:600346|HGNC:HGNC:12929|Ensembl:ENSG00000277258|Vega:OTTHUMG00000188501	17q12	polycomb group ring finger 2	protein-coding
7702	ZNF143	SBF|STAF|pHZ-1	MIM:603433|HGNC:HGNC:12928|Ensembl:ENSG00000166478|Vega:OTTHUMG00000149922	11p15.4	zinc finger protein 143	protein-coding
7593	MZF1	MZF-1|MZF1B|ZFP98|ZNF42|ZSCAN6	MIM:194550|HGNC:HGNC:13108|Ensembl:ENSG00000099326|Vega:OTTHUMG00000183550	19q13.43	myeloid zinc finger 1	protein-coding
7538	ZFP36	G0S24|GOS24|NUP475|RNF162A|TIS11|TTP|zfp-36	MIM:190700|HGNC:HGNC:12862|Ensembl:ENSG00000128016|Vega:OTTHUMG00000182970	19q13.2	ZFP36 ring finger protein	protein-coding
7481	WNT11	HWNT11	MIM:603699|HGNC:HGNC:12776|Ensembl:ENSG00000085741|Vega:OTTHUMG00000165264	11q13.5	Wnt family member 11	protein-coding
7475	WNT6	-	MIM:604663|HGNC:HGNC:12785|Ensembl:ENSG00000115596|Vega:OTTHUMG00000133082	2q35	Wnt family member 6	protein-coding
7448	VTN	V75|VN|VNT	MIM:193190|HGNC:HGNC:12724|Ensembl:ENSG00000109072|Vega:OTTHUMG00000132500	17q11.2	vitronectin	protein-coding
7447	VSNL1	HLP3|HPCAL3|HUVISL1|VILIP|VILIP-1	MIM:600817|HGNC:HGNC:12722|Ensembl:ENSG00000163032|Vega:OTTHUMG00000090645	2p24.2	visinin like 1	protein-coding
7428	VHL	HRCA1|RCA1|VHL1|pVHL	MIM:608537|HGNC:HGNC:12687|Ensembl:ENSG00000134086|Vega:OTTHUMG00000128668	3p25.3	von Hippel-Lindau tumor suppressor	protein-coding
7415	VCP	ALS14|CDC48|CMT2Y|HEL-220|HEL-S-70|IBMPFD|IBMPFD1|TERA|p97	MIM:601023|HGNC:HGNC:12666|Ensembl:ENSG00000165280|Vega:OTTHUMG00000019855	9p13.3	valosin containing protein	protein-coding
7351	UCP2	BMIQ4|SLC25A8|UCPH	MIM:601693|HGNC:HGNC:12518|Ensembl:ENSG00000175567|Vega:OTTHUMG00000168095	11q13.4	uncoupling protein 2	protein-coding
7347	UCHL3	UCH-L3	MIM:603090|HGNC:HGNC:12515|Ensembl:ENSG00000118939|Vega:OTTHUMG00000017090	13q22.2	ubiquitin C-terminal hydrolase L3	protein-coding
7301	TYRO3	BYK|Dtk|Etk-2|RSE|Rek|Sky|Tif	MIM:600341|HGNC:HGNC:12446|Ensembl:ENSG00000092445|Vega:OTTHUMG00000130341	15q15.1	TYRO3 protein tyrosine kinase	protein-coding
7298	TYMS	HST422|TMS|TS	MIM:188350|HGNC:HGNC:12441|Ensembl:ENSG00000176890|Vega:OTTHUMG00000131473	18p11.32	thymidylate synthetase	protein-coding
7295	TXN	TRDX|TRX|TRX1	MIM:187700|HGNC:HGNC:12435|Ensembl:ENSG00000136810|Vega:OTTHUMG00000020480	9q31.3	thioredoxin	protein-coding
7284	TUFM	COXPD4|EF-TuMT|EFTU|P43	MIM:602389|HGNC:HGNC:12420|Ensembl:ENSG00000178952|Vega:OTTHUMG00000097039	16p11.2	Tu translation elongation factor, mitochondrial	protein-coding
728	C5AR1	C5A|C5AR|C5R1|CD88	MIM:113995|HGNC:HGNC:1338|Ensembl:ENSG00000197405|Vega:OTTHUMG00000183504	19q13.32	complement C5a receptor 1	protein-coding
7262	PHLDA2	BRW1C|BWR1C|HLDA2|IPL|TSSC3	MIM:602131|HGNC:HGNC:12385|Ensembl:ENSG00000181649|Vega:OTTHUMG00000010926	11p15.4	pleckstrin homology like domain family A member 2	protein-coding
7249	TSC2	LAM|PPP1R160|TSC4	MIM:191092|HGNC:HGNC:12363|Ensembl:ENSG00000103197|Vega:OTTHUMG00000128745	16p13.3	TSC complex subunit 2	protein-coding
7248	TSC1	LAM|TSC	MIM:605284|HGNC:HGNC:12362|Ensembl:ENSG00000165699|Vega:OTTHUMG00000020844	9q34.13	TSC complex subunit 1	protein-coding
7224	TRPC5	PPP1R159|TRP5	MIM:300334|HGNC:HGNC:12337|Ensembl:ENSG00000072315|Vega:OTTHUMG00000022212	Xq23	transient receptor potential cation channel subfamily C member 5	protein-coding
72	ACTG2	ACT|ACTA3|ACTE|ACTL3|ACTSG|VSCM	MIM:102545|HGNC:HGNC:145|Ensembl:ENSG00000163017|Vega:OTTHUMG00000129813	2p13.1	actin, gamma 2, smooth muscle, enteric	protein-coding
7158	TP53BP1	53BP1|TDRD30|TP53|p202|p53BP1	MIM:605230|HGNC:HGNC:11999|Ensembl:ENSG00000067369|Vega:OTTHUMG00000059757	15q15.3	tumor protein p53 binding protein 1	protein-coding
7148	TNXB	EDS3|HXBL|TENX|TN-X|TNX|TNXB1|TNXB2|TNXBS|VUR8|XB|XBS	MIM:600985|HGNC:HGNC:11976|Ensembl:ENSG00000168477|Vega:OTTHUMG00000031088	6p21.33-p21.32	tenascin XB	protein-coding
7145	TNS1	MST091|MST122|MST127|MSTP091|MSTP122|MSTP127|MXRA6|PPP1R155|TNS	MIM:600076|HGNC:HGNC:11973|Ensembl:ENSG00000079308|Vega:OTTHUMG00000133056	2q35	tensin 1	protein-coding
7094	TLN1	ILWEQ|TLN|talin-1	MIM:186745|HGNC:HGNC:11845|Ensembl:ENSG00000137076|Vega:OTTHUMG00000019874	9p13.3	talin 1	protein-coding
7091	TLE4	BCE-1|BCE1|E(spI)|ESG|ESG4|GRG4|Grg-4	MIM:605132|HGNC:HGNC:11840|Ensembl:ENSG00000106829|Vega:OTTHUMG00000020072	9q21.31	transducin like enhancer of split 4	protein-coding
7082	TJP1	ZO-1	MIM:601009|HGNC:HGNC:11827|Ensembl:ENSG00000104067|Vega:OTTHUMG00000137397	15q13.1	tight junction protein 1	protein-coding
7078	TIMP3	HSMRK222|K222|K222TA2|SFD	MIM:188826|HGNC:HGNC:11822|Ensembl:ENSG00000100234|Vega:OTTHUMG00000030784	22q12.3	TIMP metallopeptidase inhibitor 3	protein-coding
7026	NR2F2	ARP1|CHTD4|COUPTFB|COUPTFII|NF-E3|NR2F1|SVP40|TFCOUP2	MIM:107773|HGNC:HGNC:7976|Ensembl:ENSG00000185551|Vega:OTTHUMG00000149848	15q26.2	nuclear receptor subfamily 2 group F member 2	protein-coding
7024	TFCP2	LBP1C|LSF|LSF1D|SEF|TFCP2C	MIM:189889|HGNC:HGNC:11748|Ensembl:ENSG00000135457|Vega:OTTHUMG00000169621	12q13.12-q13.13	transcription factor CP2	protein-coding
6997	TDGF1	CR|CRGF|CRIPTO	MIM:187395|HGNC:HGNC:11701|Ensembl:ENSG00000241186|Vega:OTTHUMG00000191661	3p21.31	teratocarcinoma-derived growth factor 1	protein-coding
6932	TCF7	TCF-1	MIM:189908|HGNC:HGNC:11639|Ensembl:ENSG00000081059|Vega:OTTHUMG00000129124	5q31.1	transcription factor 7	protein-coding
6926	TBX3	TBX3-ISO|UMS|XHL	MIM:601621|HGNC:HGNC:11602|Ensembl:ENSG00000135111|Vega:OTTHUMG00000169586	12q24.21	T-box 3	protein-coding
6909	TBX2	-	MIM:600747|HGNC:HGNC:11597|Ensembl:ENSG00000121068|Vega:OTTHUMG00000156986	17q23.2	T-box 2	protein-coding
6901	TAZ	BTHS|CMD3A|EFE|EFE2|G4.5|LVNCX|Taz1	MIM:300394|HGNC:HGNC:11577|Ensembl:ENSG00000102125|Vega:OTTHUMG00000033190	Xq28	tafazzin	protein-coding
688	KLF5	BTEB2|CKLF|IKLF	MIM:602903|HGNC:HGNC:6349|Ensembl:ENSG00000102554|Vega:OTTHUMG00000017074	13q22.1	Kruppel like factor 5	protein-coding
6768	ST14	ARCI11|HAI|MT-SP1|MTSP1|PRSS14|SNC19|TADG15|TMPRSS14	MIM:606797|HGNC:HGNC:11344|Ensembl:ENSG00000149418|Vega:OTTHUMG00000165768	11q24.3	suppression of tumorigenicity 14	protein-coding
6720	SREBF1	SREBP-1c|SREBP1|SREBP1a|bHLHd1	MIM:184756|HGNC:HGNC:11289|Ensembl:ENSG00000072310|Vega:OTTHUMG00000059313	17p11.2	sterol regulatory element binding transcription factor 1	protein-coding
6658	SOX3	GHDX|MRGH|PHP|PHPX|SOXB	MIM:313430|HGNC:HGNC:11199|Ensembl:ENSG00000134595|Vega:OTTHUMG00000022544	Xq27.1	SRY-box 3	protein-coding
6651	SON	BASS1|C21orf50|DBP-5|NREBP|SON3|TOKIMS	MIM:182465|HGNC:HGNC:11183|Ensembl:ENSG00000159140|Vega:OTTHUMG00000065806	21q22.11	SON DNA binding protein	protein-coding
6648	SOD2	IPO-B|IPOB|MNSOD|MVCD6|Mn-SOD	MIM:147460|HGNC:HGNC:11180|Ensembl:ENSG00000112096|Vega:OTTHUMG00000015940	6q25.3	superoxide dismutase 2	protein-coding
65975	STK33	-	MIM:607670|HGNC:HGNC:14568|Ensembl:ENSG00000130413|Vega:OTTHUMG00000140275	11p15.4	serine/threonine kinase 33	protein-coding
6586	SLIT3	MEGF5|SLIL2|SLIT1|Slit-3|slit2	MIM:603745|HGNC:HGNC:11087|Ensembl:ENSG00000184347|Vega:OTTHUMG00000130409	5q34-q35.1	slit guidance ligand 3	protein-coding
6513	SLC2A1	CSE|DYT17|DYT18|DYT9|EIG12|GLUT|GLUT-1|GLUT1|GLUT1DS|HTLVR|PED|SDCHCN	MIM:138140|HGNC:HGNC:11005|Ensembl:ENSG00000117394|Vega:OTTHUMG00000007657	1p34.2	solute carrier family 2 member 1	protein-coding
6500	SKP1	EMC19|OCP-II|OCP2|SKP1A|TCEB1L|p19A	MIM:601434|HGNC:HGNC:10899|Ensembl:ENSG00000113558|Vega:OTTHUMG00000129117	5q31.1	S-phase kinase associated protein 1	protein-coding
6497	SKI	SGS|SKV	MIM:164780|HGNC:HGNC:10896|Ensembl:ENSG00000157933|Vega:OTTHUMG00000001407	1p36.33-p36.32	SKI proto-oncogene	protein-coding
6489	ST8SIA1	GD3S|SIAT8|SIAT8-A|SIAT8A|ST8SiaI	MIM:601123|HGNC:HGNC:10869|Ensembl:ENSG00000111728|Vega:OTTHUMG00000169098	12p12.1	ST8 alpha-N-acetyl-neuraminide alpha-2,8-sialyltransferase 1	protein-coding
6480	ST6GAL1	SIAT1|ST6GalI|ST6N	MIM:109675|HGNC:HGNC:10860|Ensembl:ENSG00000073849|Vega:OTTHUMG00000156500	3q27.3	ST6 beta-galactoside alpha-2,6-sialyltransferase 1	protein-coding
6478	SIAH2	hSiah2	MIM:602213|HGNC:HGNC:10858|Ensembl:ENSG00000181788|Vega:OTTHUMG00000159847	3q25.1	siah E3 ubiquitin protein ligase 2	protein-coding
6477	SIAH1	SIAH1A	MIM:602212|HGNC:HGNC:10857|Ensembl:ENSG00000196470|Vega:OTTHUMG00000175417	16q12.1	siah E3 ubiquitin protein ligase 1	protein-coding
6464	SHC1	SHC|SHCA	MIM:600560|HGNC:HGNC:10840|Ensembl:ENSG00000160691|Vega:OTTHUMG00000037295	1q21.3	SHC adaptor protein 1	protein-coding
64506	CPEB1	CPE-BP1|CPEB|CPEB-1|h-CPEB|hCPEB-1	MIM:607342|HGNC:HGNC:21744|Ensembl:ENSG00000214575|Vega:OTTHUMG00000172877	15q25.2	cytoplasmic polyadenylation element binding protein 1	protein-coding
64400	AKTIP	FT1|FTS	MIM:608483|HGNC:HGNC:16710|Ensembl:ENSG00000166971|Vega:OTTHUMG00000133199	16q12.2	AKT interacting protein	protein-coding
6440	SFTPC	BRICD6|PSP-C|SFTP2|SMDP2|SP-C	MIM:178620|HGNC:HGNC:10802|Ensembl:ENSG00000168484|Vega:OTTHUMG00000163775	8p21.3	surfactant protein C	protein-coding
64321	SOX17	VUR3	MIM:610928|HGNC:HGNC:18122|Ensembl:ENSG00000164736|Vega:OTTHUMG00000164377	8q11.23	SRY-box 17	protein-coding
64218	SEMA4A	CORD10|RP35|SEMAB|SEMB	MIM:607292|HGNC:HGNC:10729|Ensembl:ENSG00000196189|Vega:OTTHUMG00000014042	1q22	semaphorin 4A	protein-coding
64100	ELSPBP1	E12|EDDM12|EL149|HE12	MIM:607443|HGNC:HGNC:14417|Ensembl:ENSG00000169393|Vega:OTTHUMG00000183138	19q13.33	epididymal sperm binding protein 1	protein-coding
64083	GOLPH3	GOPP1|GPP34|MIDAS|Vps74	MIM:612207|HGNC:HGNC:15452|Ensembl:ENSG00000113384|Vega:OTTHUMG00000090679	5p13.3	golgi phosphoprotein 3	protein-coding
6376	CX3CL1	ABCD-3|C3Xkine|CXC3|CXC3C|NTN|NTT|SCYD1|fractalkine|neurotactin	MIM:601880|HGNC:HGNC:10647|Ensembl:ENSG00000006210|Vega:OTTHUMG00000133469	16q21	C-X3-C motif chemokine ligand 1	protein-coding
6370	CCL25	Ckb15|SCYA25|TECK	MIM:602565|HGNC:HGNC:10624|Ensembl:ENSG00000131142|Vega:OTTHUMG00000141287	19p13.2	C-C motif chemokine ligand 25	protein-coding
6367	CCL22	A-152E5.1|ABCD-1|DC/B-CK|MDC|SCYA22|STCP-1	MIM:602957|HGNC:HGNC:10621|Ensembl:ENSG00000102962|Vega:OTTHUMG00000133454	16q21	C-C motif chemokine ligand 22	protein-coding
6348	CCL3	G0S19-1|LD78ALPHA|MIP-1-alpha|MIP1A|SCYA3	MIM:182283|HGNC:HGNC:10627|Ensembl:ENSG00000277632|Vega:OTTHUMG00000188413	17q12	C-C motif chemokine ligand 3	protein-coding
6318	SERPINB4	LEUPIN|PI11|SCCA-2|SCCA1|SCCA2	MIM:600518|HGNC:HGNC:10570|Ensembl:ENSG00000206073|Vega:OTTHUMG00000060405	18q21.33	serpin family B member 4	protein-coding
6310	ATXN1	ATX1|D6S504E|SCA1	MIM:601556|HGNC:HGNC:10548|Ensembl:ENSG00000124788|Vega:OTTHUMG00000014303	6p22.3	ataxin 1	protein-coding
6299	SALL1	HEL-S-89|HSAL1|Sal-1|TBS|ZNF794	MIM:602218|HGNC:HGNC:10524|Ensembl:ENSG00000103449|Vega:OTTHUMG00000133176	16q12.1	spalt like transcription factor 1	protein-coding
6286	S100P	MIG9	MIM:600614|HGNC:HGNC:10504|Ensembl:ENSG00000163993|Vega:OTTHUMG00000090491	4p16.1	S100 calcium binding protein P	protein-coding
6280	S100A9	60B8AG|CAGB|CFAG|CGLB|L1AG|LIAG|MAC387|MIF|MRP14|NIF|P14	MIM:123886|HGNC:HGNC:10499|Ensembl:ENSG00000163220|Vega:OTTHUMG00000013125	1q21.3	S100 calcium binding protein A9	protein-coding
6279	S100A8	60B8AG|CAGA|CFAG|CGLA|CP-10|L1Ag|MA387|MIF|MRP8|NIF|P8	MIM:123885|HGNC:HGNC:10498|Ensembl:ENSG00000143546|Vega:OTTHUMG00000013124	1q21.3	S100 calcium binding protein A8	protein-coding
6277	S100A6	2A9|5B10|CABP|CACY|PRA	MIM:114110|HGNC:HGNC:10496|Ensembl:ENSG00000197956|Vega:OTTHUMG00000013549	1q21.3	S100 calcium binding protein A6	protein-coding
6273	S100A2	CAN19|S100L	MIM:176993|HGNC:HGNC:10492|Ensembl:ENSG00000196754|Vega:OTTHUMG00000035031	1q21.3	S100 calcium binding protein A2	protein-coding
6098	ROS1	MCF3|ROS|c-ros-1	MIM:165020|HGNC:HGNC:10261|Ensembl:ENSG00000047936|Vega:OTTHUMG00000016188	6q22.1	ROS proto-oncogene 1, receptor tyrosine kinase	protein-coding
6097	RORC	IMD42|NR1F3|RORG|RZR-GAMMA|RZRG|TOR	MIM:602943|HGNC:HGNC:10260|Ensembl:ENSG00000143365|Vega:OTTHUMG00000013053	1q21.3	RAR related orphan receptor C	protein-coding
60412	EXOC4	SEC8|SEC8L1|Sec8p	MIM:608185|HGNC:HGNC:30389|Ensembl:ENSG00000131558|Vega:OTTHUMG00000155259	7q33	exocyst complex component 4	protein-coding
604	BCL6	BCL5|BCL6A|LAZ3|ZBTB27|ZNF51	MIM:109565|HGNC:HGNC:1001|Ensembl:ENSG00000113916|Vega:OTTHUMG00000156441	3q27.3	B-cell CLL/lymphoma 6	protein-coding
5998	RGS3	C2PA|RGP3	MIM:602189|HGNC:HGNC:9999|Ensembl:ENSG00000138835|Vega:OTTHUMG00000021048	9q32	regulator of G protein signaling 3	protein-coding
5962	RDX	DFNB24	MIM:179410|HGNC:HGNC:9944|Ensembl:ENSG00000137710|Vega:OTTHUMG00000166574	11q22.3	radixin	protein-coding
5948	RBP2	CRABP-II|CRBP2|CRBPII|RBPC2	MIM:180280|HGNC:HGNC:9920|Ensembl:ENSG00000114113|Vega:OTTHUMG00000159956	3q23	retinol binding protein 2	protein-coding
59343	SENP2	AXAM2|SMT3IP2	MIM:608261|HGNC:HGNC:23116|Ensembl:ENSG00000163904|Vega:OTTHUMG00000156658	3q27.2	SUMO1/sentrin/SMT3 specific peptidase 2	protein-coding
59277	NTN4	PRO3091	MIM:610401|HGNC:HGNC:13658|Ensembl:ENSG00000074527|Vega:OTTHUMG00000170290	12q22	netrin 4	protein-coding
5921	RASA1	CM-AVM|CMAVM|GAP|PKWS|RASA|RASGAP|p120|p120GAP|p120RASGAP	MIM:139150|HGNC:HGNC:9871|Ensembl:ENSG00000145715|Vega:OTTHUMG00000162605	5q14.3	RAS p21 protein activator 1	protein-coding
58497	PRUNE1	DRES-17|DRES17|H-PRUNE|HTCD37|NMIHBA|PRUNE	MIM:617413|HGNC:HGNC:13420|Ensembl:ENSG00000143363|Vega:OTTHUMG00000035062	1q21.3	prune exopolyphosphatase 1	protein-coding
58191	CXCL16	CXCLG16|SR-PSOX|SRPSOX	MIM:605398|HGNC:HGNC:16642|Ensembl:ENSG00000161921|Vega:OTTHUMG00000090761	17p13.2	C-X-C motif chemokine ligand 16	protein-coding
5803	PTPRZ1	HPTPZ|HPTPzeta|PTP-ZETA|PTP18|PTPRZ|PTPZ|R-PTP-zeta-2|RPTPB|RPTPbeta|phosphacan	MIM:176891|HGNC:HGNC:9685|Ensembl:ENSG00000106278|Vega:OTTHUMG00000157057	7q31.32	protein tyrosine phosphatase, receptor type Z1	protein-coding
579	NKX3-2	BAPX1|NKX3.2|NKX3B|SMMD	MIM:602183|HGNC:HGNC:951|Ensembl:ENSG00000109705|Vega:OTTHUMG00000090657	4p15.33	NK3 homeobox 2	protein-coding
5784	PTPN14	PEZ|PTP36	MIM:603155|HGNC:HGNC:9647|Ensembl:ENSG00000152104|Vega:OTTHUMG00000037039	1q32.3-q41	protein tyrosine phosphatase, non-receptor type 14	protein-coding
5777	PTPN6	HCP|HCPH|HPTP1C|PTP-1C|SH-PTP1|SHP-1|SHP-1L|SHP1	MIM:176883|HGNC:HGNC:9658|Ensembl:ENSG00000111679|Vega:OTTHUMG00000168518	12p13.31	protein tyrosine phosphatase, non-receptor type 6	protein-coding
57758	SCUBE2	CEGB1|CEGF1|CEGP1	MIM:611747|HGNC:HGNC:30425|Ensembl:ENSG00000175356|Vega:OTTHUMG00000163880	11p15.4	signal peptide, CUB domain and EGF like domain containing 2	protein-coding
57669	EPB41L5	BE37|YMO1|YRT	MIM:611730|HGNC:HGNC:19819|Ensembl:ENSG00000115109|Vega:OTTHUMG00000131433	2q14.2	erythrocyte membrane protein band 4.1 like 5	protein-coding
5764	PTN	HARP|HB-GAM|HBBM|HBGF-8|HBGF8|HBNF|HBNF-1|NEGF1|OSF-1	MIM:162095|HGNC:HGNC:9630|Ensembl:ENSG00000105894|Vega:OTTHUMG00000155709	7q33	pleiotrophin	protein-coding
57620	STIM2	-	MIM:610841|HGNC:HGNC:19205|Ensembl:ENSG00000109689|Vega:OTTHUMG00000097805	4p15.2	stromal interaction molecule 2	protein-coding
57509	MTUS1	ATBP|ATIP|ATIP3|ICIS|MP44|MTSG1	MIM:609589|HGNC:HGNC:29789|Ensembl:ENSG00000129422|Vega:OTTHUMG00000163756	8p22	microtubule associated scaffold protein 1	protein-coding
57496	MKL2	MRTF-B|MRTFB|NPD001	MIM:609463|HGNC:HGNC:29819|Ensembl:ENSG00000186260|Vega:OTTHUMG00000177379	16p13.12	MKL1/myocardin like 2	protein-coding
57403	RAB22A	-	MIM:612966|HGNC:HGNC:9764|Ensembl:ENSG00000124209|Vega:OTTHUMG00000032844	20q13.32	RAB22A, member RAS oncogene family	protein-coding
57118	CAMK1D	CKLiK|CaM-K1|CaMKID	MIM:607957|HGNC:HGNC:19341|Ensembl:ENSG00000183049|Vega:OTTHUMG00000017683	10p13	calcium/calmodulin dependent protein kinase ID	protein-coding
57057	TBX20	ASD4	MIM:606061|HGNC:HGNC:11598|Ensembl:ENSG00000164532|Vega:OTTHUMG00000099411	7p14.2	T-box 20	protein-coding
56983	POGLUT1	C3orf9|CLP46|KDELCL1|KTELC1|LGMD2Z|MDS010|MDSRP|Rumi|hCLP46	MIM:615618|HGNC:HGNC:22954|Ensembl:ENSG00000163389|Vega:OTTHUMG00000159379	3q13.33	protein O-glucosyltransferase 1	protein-coding
5629	PROX1	-	MIM:601546|HGNC:HGNC:9459|Ensembl:ENSG00000117707|Vega:OTTHUMG00000036946	1q32.3	prospero homeobox 1	protein-coding
55966	AJAP1	MOT8|SHREW-1|SHREW1	MIM:610972|HGNC:HGNC:30801|Ensembl:ENSG00000196581|Vega:OTTHUMG00000000645	1p36.32	adherens junctions associated protein 1	protein-coding
5588	PRKCQ	PRKCT|nPKC-theta	MIM:600448|HGNC:HGNC:9410|Ensembl:ENSG00000065675|Vega:OTTHUMG00000017623	10p15.1	protein kinase C theta	protein-coding
55869	HDAC8	CDA07|CDLS5|HD8|HDACL1|MRXS6|RPD3|WTS	MIM:300269|HGNC:HGNC:13315|Ensembl:ENSG00000147099|Vega:OTTHUMG00000021814	Xq13.1	histone deacetylase 8	protein-coding
55824	PAG1	CBP|PAG	MIM:605767|HGNC:HGNC:30043|Ensembl:ENSG00000076641|Vega:OTTHUMG00000164592	8q21.13	phosphoprotein membrane anchor with glycosphingolipid microdomains 1	protein-coding
55818	KDM3A	JHDM2A|JHMD2A|JMJD1|JMJD1A|TSGA	MIM:611512|HGNC:HGNC:20815|Ensembl:ENSG00000115548|Vega:OTTHUMG00000130204	2p11.2	lysine demethylase 3A	protein-coding
55810	FOXJ2	FHX	HGNC:HGNC:24818|Ensembl:ENSG00000065970|Vega:OTTHUMG00000168526	12p13.31	forkhead box J2	protein-coding
5581	PRKCE	PKCE|nPKC-epsilon	MIM:176975|HGNC:HGNC:9401|Ensembl:ENSG00000171132|Vega:OTTHUMG00000128817	2p21	protein kinase C epsilon	protein-coding
5563	PRKAA2	AMPK|AMPK2|AMPKa2|PRKAA	MIM:600497|HGNC:HGNC:9377|Ensembl:ENSG00000162409|Vega:OTTHUMG00000008282	1p32.2	protein kinase AMP-activated catalytic subunit alpha 2	protein-coding
55612	FERMT1	C20orf42|DTGCU2|KIND1|UNC112A|URP1	MIM:607900|HGNC:HGNC:15889|Ensembl:ENSG00000101311|Vega:OTTHUMG00000031826	20p12.3	fermitin family member 1	protein-coding
55366	LGR4	BNMD17|GPR48	MIM:606666|HGNC:HGNC:13299|Ensembl:ENSG00000205213|Vega:OTTHUMG00000133508	11p14.1	leucine rich repeat containing G protein-coupled receptor 4	protein-coding
55290	BRF2	BRFU|TFIIIB50	MIM:607013|HGNC:HGNC:17298|Ensembl:ENSG00000104221|Vega:OTTHUMG00000164025	8p11.23	BRF2, RNA polymerase III transcription initiation factor subunit	protein-coding
55272	IMP3	BRMS2|C15orf12|MRPS4	MIM:612980|HGNC:HGNC:14497|Ensembl:ENSG00000177971|Vega:OTTHUMG00000142840	15q24.2	IMP3, U3 small nucleolar ribonucleoprotein	protein-coding
5524	PTPA	PP2A|PPP2R4|PR53	MIM:600756|HGNC:HGNC:9308|Ensembl:ENSG00000119383|Vega:OTTHUMG00000020774	9q34.11	protein phosphatase 2 phosphatase activator	protein-coding
5511	PPP1R8	ARD-1|ARD1|NIPP-1|NIPP1|PRO2047	MIM:602636|HGNC:HGNC:9296|Ensembl:ENSG00000117751|Vega:OTTHUMG00000003734	1p35.3	protein phosphatase 1 regulatory subunit 8	protein-coding
54810	GIPC2	SEMCAP-2|SEMCAP2	HGNC:HGNC:18177|Ensembl:ENSG00000137960|Vega:OTTHUMG00000041145	1p31.1	GIPC PDZ domain containing family member 2	protein-coding
5443	POMC	ACTH|CLIP|LPH|MSH|NPP|POC	MIM:176830|HGNC:HGNC:9201|Ensembl:ENSG00000115138|Vega:OTTHUMG00000094764	2p23.3	proopiomelanocortin	protein-coding
54206	ERRFI1	GENE-33|MIG-6|MIG6|RALT	MIM:608069|HGNC:HGNC:18185|Ensembl:ENSG00000116285|Vega:OTTHUMG00000001221	1p36.23	ERBB receptor feedback inhibitor 1	protein-coding
53615	MBD3	-	MIM:603573|HGNC:HGNC:6918|Ensembl:ENSG00000071655|Vega:OTTHUMG00000180081	19p13.3	methyl-CpG binding domain protein 3	protein-coding
5358	PLS3	BMND18|T-plastin	MIM:300131|HGNC:HGNC:9091|Ensembl:ENSG00000102024|Vega:OTTHUMG00000022237	Xq23	plastin 3	protein-coding
5326	PLAGL2	ZNF900	MIM:604866|HGNC:HGNC:9047|Ensembl:ENSG00000126003|Vega:OTTHUMG00000032210	20q11.21	PLAG1 like zinc finger 2	protein-coding
5321	PLA2G4A	PLA2G4|cPLA2|cPLA2-alpha	MIM:600522|HGNC:HGNC:9035|Ensembl:ENSG00000116711|Vega:OTTHUMG00000035512	1q31.1	phospholipase A2 group IVA	protein-coding
5295	PIK3R1	AGM7|GRB1|IMD36|p85|p85-ALPHA	MIM:171833|HGNC:HGNC:8979|Ensembl:ENSG00000145675|Vega:OTTHUMG00000131251	5q13.1	phosphoinositide-3-kinase regulatory subunit 1	protein-coding
5274	SERPINI1	PI12|neuroserpin	MIM:602445|HGNC:HGNC:8943|Ensembl:ENSG00000163536|Vega:OTTHUMG00000158450	3q26.1	serpin family I member 1	protein-coding
5243	ABCB1	ABC20|CD243|CLCS|GP170|MDR1|P-GP|PGY1	MIM:171050|HGNC:HGNC:40|Ensembl:ENSG00000085563|Vega:OTTHUMG00000023393	7q21.12	ATP binding cassette subfamily B member 1	protein-coding
51765	STK26	MASK|MST4	MIM:300547|HGNC:HGNC:18174|Ensembl:ENSG00000134602|Vega:OTTHUMG00000022420	Xq26.2	serine/threonine kinase 26	protein-coding
51741	WWOX	D16S432E|EIEE28|FOR|FRA16D|HHCMA56|PRO0128|SCAR12|SDR41C1|WOX1	MIM:605131|HGNC:HGNC:12799|Ensembl:ENSG00000186153|Vega:OTTHUMG00000176851	16q23.1-q23.2	WW domain containing oxidoreductase	protein-coding
51720	UIMC1	RAP80|X2HRIP110	MIM:609433|HGNC:HGNC:30298|Ensembl:ENSG00000087206|Vega:OTTHUMG00000130852	5q35.2	ubiquitin interaction motif containing 1	protein-coding
51706	CYB5R1	B5R.1|B5R1|B5R2|NQO3A2|humb5R2	MIM:608341|HGNC:HGNC:13397|Ensembl:ENSG00000159348|Vega:OTTHUMG00000041387	1q32.1	cytochrome b5 reductase 1	protein-coding
5159	PDGFRB	CD140B|IBGC4|IMF1|JTK12|KOGS|PDGFR|PDGFR-1|PDGFR1|PENTT	MIM:173410|HGNC:HGNC:8804|Ensembl:ENSG00000113721|Vega:OTTHUMG00000130053	5q32	platelet derived growth factor receptor beta	protein-coding
51554	ACKR4	CC-CKR-11|CCBP2|CCR-11|CCR10|CCR11|CCRL1|CCX CKR|CCX-CKR|CKR-11|PPR1|VSHK1	MIM:606065|HGNC:HGNC:1611|Ensembl:ENSG00000129048|Vega:OTTHUMG00000159768	3q22.1	atypical chemokine receptor 4	protein-coding
5155	PDGFB	IBGC5|PDGF-2|PDGF2|SIS|SSV|c-sis	MIM:190040|HGNC:HGNC:8800|Ensembl:ENSG00000100311|Vega:OTTHUMG00000151029	22q13.1	platelet derived growth factor subunit B	protein-coding
51474	LIMA1	EPLIN|SREBP3	MIM:608364|HGNC:HGNC:24636|Ensembl:ENSG00000050405|Vega:OTTHUMG00000169852	12q13.12	LIM domain and actin binding 1	protein-coding
51450	PRRX2	PMX2|PRX2	MIM:604675|HGNC:HGNC:21338|Ensembl:ENSG00000167157|Vega:OTTHUMG00000020790	9q34.11	paired related homeobox 2	protein-coding
5141	PDE4A	DPDE2|PDE4|PDE46	MIM:600126|HGNC:HGNC:8780|Ensembl:ENSG00000065989|Vega:OTTHUMG00000180411	19p13.2	phosphodiesterase 4A	protein-coding
51366	UBR5	DD5|EDD|EDD1|HYD	MIM:608413|HGNC:HGNC:16806|Ensembl:ENSG00000104517|Vega:OTTHUMG00000164755	8q22.3	ubiquitin protein ligase E3 component n-recognin 5	protein-coding
51316	PLAC8	C15|DGIC|PNAS-144|onzin	MIM:607515|HGNC:HGNC:19254|Ensembl:ENSG00000145287|Vega:OTTHUMG00000130294	4q21.22	placenta specific 8	protein-coding
51270	TFDP3	CT30|DP4|HCA661	MIM:300772|HGNC:HGNC:24603|Ensembl:ENSG00000183434|Vega:OTTHUMG00000022433	Xq26.2	transcription factor Dp family member 3	protein-coding
5122	PCSK1	BMIQ12|NEC1|PC1|PC3|SPC3	MIM:162150|HGNC:HGNC:8743|Ensembl:ENSG00000175426|Vega:OTTHUMG00000122089	5q15	proprotein convertase subtilisin/kexin type 1	protein-coding
51147	ING4	my036|p29ING4	MIM:608524|HGNC:HGNC:19423|Ensembl:ENSG00000111653|Vega:OTTHUMG00000141274	12p13.31	inhibitor of growth family member 4	protein-coding
51129	ANGPTL4	ARP4|FIAF|HARP|HFARP|NL2|PGAR|TGQTL|UNQ171|pp1158	MIM:605910|HGNC:HGNC:16039|Ensembl:ENSG00000167772|Vega:OTTHUMG00000182273	19p13.2	angiopoietin like 4	protein-coding
5110	PCMT1	PIMT	MIM:176851|HGNC:HGNC:8728|Ensembl:ENSG00000120265|Vega:OTTHUMG00000015794	6q25.1	protein-L-isoaspartate (D-aspartate) O-methyltransferase	protein-coding
51053	GMNN	Gem|MGORS6	MIM:602842|HGNC:HGNC:17493|Ensembl:ENSG00000112312|Vega:OTTHUMG00000014363	6p22.3	geminin, DNA replication inhibitor	protein-coding
5101	PCDH9	-	MIM:603581|HGNC:HGNC:8661|Ensembl:ENSG00000184226|Vega:OTTHUMG00000017040	13q21.32	protocadherin 9	protein-coding
5090	PBX3	-	MIM:176312|HGNC:HGNC:8634|Ensembl:ENSG00000167081|Vega:OTTHUMG00000020684	9q33.3	PBX homeobox 3	protein-coding
50855	PARD6A	PAR-6A|PAR6|PAR6C|PAR6alpha|TAX40|TIP-40	MIM:607484|HGNC:HGNC:15943|Ensembl:ENSG00000102981|Vega:OTTHUMG00000137534	16q22.1	par-6 family cell polarity regulator alpha	protein-coding
50674	NEUROG3	Atoh5|Math4B|NGN-3|bHLHa7|ngn3	MIM:604882|HGNC:HGNC:13806|Ensembl:ENSG00000122859|Vega:OTTHUMG00000018391	10q22.1	neurogenin 3	protein-coding
50616	IL22	IL-21|IL-22|IL-D110|IL-TIF|ILTIF|TIFIL-23|TIFa|zcyto18	MIM:605330|HGNC:HGNC:14900|Ensembl:ENSG00000127318|Vega:OTTHUMG00000169119	12q15	interleukin 22	protein-coding
5052	PRDX1	MSP23|NKEF-A|NKEFA|PAG|PAGA|PAGB|PRX1|PRXI|TDPX2	MIM:176763|HGNC:HGNC:9352|Ensembl:ENSG00000117450|Vega:OTTHUMG00000007738	1p34.1	peroxiredoxin 1	protein-coding
4988	OPRM1	LMOR|M-OR-1|MOP|MOR|MOR1|OPRM	MIM:600018|HGNC:HGNC:8156|Ensembl:ENSG00000112038|Vega:OTTHUMG00000015870	6q25.2	opioid receptor mu 1	protein-coding
4925	NUCB2	HEL-S-109|NEFA	MIM:608020|HGNC:HGNC:8044|Ensembl:ENSG00000070081|Vega:OTTHUMG00000166050	11p15.1	nucleobindin 2	protein-coding
4919	ROR1	NTRKR1|dJ537F10.1	MIM:602336|HGNC:HGNC:10256|Ensembl:ENSG00000185483|Vega:OTTHUMG00000009022	1p31.3	receptor tyrosine kinase like orphan receptor 1	protein-coding
4916	NTRK3	GP145-TrkC|TRKC|gp145(trkC)	MIM:191316|HGNC:HGNC:8033|Ensembl:ENSG00000140538|Vega:OTTHUMG00000148677	15q25.3	neurotrophic receptor tyrosine kinase 3	protein-coding
4878	NPPA	ANF|ANP|ATFB6|ATRST2|CDD|CDD-ANF|CDP|PND	MIM:108780|HGNC:HGNC:7939|Ensembl:ENSG00000175206|Vega:OTTHUMG00000002388	1p36.22	natriuretic peptide A	protein-coding
4856	NOV	CCN3|IBP-9|IGFBP-9|IGFBP9|NOVh	MIM:164958|HGNC:HGNC:7885|Ensembl:ENSG00000136999|Vega:OTTHUMG00000164984	8q24.12	nephroblastoma overexpressed	protein-coding
4855	NOTCH4	INT3	MIM:164951|HGNC:HGNC:7884|Ensembl:ENSG00000204301|Vega:OTTHUMG00000031044	6p21.32	notch 4	protein-coding
4854	NOTCH3	CADASIL|CADASIL1|CASIL|IMF2|LMNS	MIM:600276|HGNC:HGNC:7883|Ensembl:ENSG00000074181|Vega:OTTHUMG00000183217	19p13.12	notch 3	protein-coding
4830	NME1	AWD|GAAD|NB|NBS|NDKA|NDPK-A|NDPKA|NM23|NM23-H1	MIM:156490|HGNC:HGNC:7849|Ensembl:ENSG00000239672|Vega:OTTHUMG00000137474	17q21.33	NME/NM23 nucleoside diphosphate kinase 1	protein-coding
4825	NKX6-1	NKX6.1|NKX6A	MIM:602563|HGNC:HGNC:7839|Ensembl:ENSG00000163623|Vega:OTTHUMG00000130426	4q21.23	NK6 homeobox 1	protein-coding
4783	NFIL3	E4BP4|IL3BP1|NF-IL3A|NFIL3A	MIM:605327|HGNC:HGNC:7787|Ensembl:ENSG00000165030|Vega:OTTHUMG00000020209	9q22.31	nuclear factor, interleukin 3 regulated	protein-coding
4782	NFIC	CTF|CTF5|NF-I|NFI	MIM:600729|HGNC:HGNC:7786|Ensembl:ENSG00000141905|Vega:OTTHUMG00000180731	19p13.3	nuclear factor I C	protein-coding
4633	MYL2	CMH10|MLC-2s/v|MLC2	MIM:160781|HGNC:HGNC:7583|Ensembl:ENSG00000111245|Vega:OTTHUMG00000169535	12q24.11	myosin light chain 2	protein-coding
4615	MYD88	MYD88D	MIM:602170|HGNC:HGNC:7562|Ensembl:ENSG00000172936|Vega:OTTHUMG00000131083	3p22.2	myeloid differentiation primary response 88	protein-coding
4613	MYCN	MODED|N-myc|NMYC|ODED|bHLHe37	MIM:164840|HGNC:HGNC:7559|Ensembl:ENSG00000134323|Vega:OTTHUMG00000039579	2p24.3	MYCN proto-oncogene, bHLH transcription factor	protein-coding
4605	MYBL2	B-MYB|BMYB	MIM:601415|HGNC:HGNC:7548|Ensembl:ENSG00000101057|Vega:OTTHUMG00000033062	20q13.12	MYB proto-oncogene like 2	protein-coding
4602	MYB	Cmyb|c-myb|c-myb_CDS|efg	MIM:189990|HGNC:HGNC:7545|Ensembl:ENSG00000118513|Vega:OTTHUMG00000015629	6q23.3	MYB proto-oncogene, transcription factor	protein-coding
4591	TRIM37	MUL|POB1|TEF3	MIM:605073|HGNC:HGNC:7523|Ensembl:ENSG00000108395|Vega:OTTHUMG00000179360	17q22	tripartite motif containing 37	protein-coding
4583	MUC2	MLP|MUC-2|SMUC	MIM:158370|HGNC:HGNC:7512	11p15.5	mucin 2, oligomeric mucus/gel-forming	protein-coding
4486	MST1R	CD136|CDw136|NPCA3|PTK8|RON	MIM:600168|HGNC:HGNC:7381|Ensembl:ENSG00000164078|Vega:OTTHUMG00000156709	3p21.31	macrophage stimulating 1 receptor	protein-coding
4478	MSN	HEL70|IMD50	MIM:309845|HGNC:HGNC:7373|Ensembl:ENSG00000147065|Vega:OTTHUMG00000021723	Xq12	moesin	protein-coding
4327	MMP19	CODA|MMP18|RASI-1	MIM:601807|HGNC:HGNC:7165|Ensembl:ENSG00000123342|Vega:OTTHUMG00000170216	12q13.2	matrix metallopeptidase 19	protein-coding
4322	MMP13	CLG3|MANDP1|MDST|MMP-13	MIM:600108|HGNC:HGNC:7159|Ensembl:ENSG00000137745|Vega:OTTHUMG00000165850	11q22.2	matrix metallopeptidase 13	protein-coding
4320	MMP11	SL-3|ST3|STMY3	MIM:185261|HGNC:HGNC:7157|Ensembl:ENSG00000099953|Vega:OTTHUMG00000150742	22q11.23	matrix metallopeptidase 11	protein-coding
4317	MMP8	CLG1|HNC|MMP-8|PMNL-CL	MIM:120355|HGNC:HGNC:7175|Ensembl:ENSG00000118113|Vega:OTTHUMG00000167587	11q22.2	matrix metallopeptidase 8	protein-coding
4300	MLLT3	AF9|YEATS3	MIM:159558|HGNC:HGNC:7136|Ensembl:ENSG00000171843|Vega:OTTHUMG00000019650	9p21.3	MLLT3, super elongation complex subunit	protein-coding
430	ASCL2	ASH2|HASH2|MASH2|bHLHa45	MIM:601886|HGNC:HGNC:739|Ensembl:ENSG00000183734|Vega:OTTHUMG00000009648	11p15.5	achaete-scute family bHLH transcription factor 2	protein-coding
4286	MITF	CMM8|COMMAD|MI|WS2|WS2A|bHLHe32	MIM:156845|HGNC:HGNC:7105|Ensembl:ENSG00000187098|Vega:OTTHUMG00000149921	3p13	melanogenesis associated transcription factor	protein-coding
4283	CXCL9	CMK|Humig|MIG|SCYB9|crg-10	MIM:601704|HGNC:HGNC:7098|Ensembl:ENSG00000138755|Vega:OTTHUMG00000160889	4q21.1	C-X-C motif chemokine ligand 9	protein-coding
4209	MEF2D	-	MIM:600663|HGNC:HGNC:6997|Ensembl:ENSG00000116604|Vega:OTTHUMG00000033095	1q22	myocyte enhancer factor 2D	protein-coding
4194	MDM4	HDMX|MDMX|MRP1	MIM:602704|HGNC:HGNC:6974|Ensembl:ENSG00000198625|Vega:OTTHUMG00000035877	1q32.1	MDM4, p53 regulator	protein-coding
417	ART1	ART2|ARTC1|CD296|RT6	MIM:601625|HGNC:HGNC:723|Ensembl:ENSG00000129744|Vega:OTTHUMG00000011845	11p15.4	ADP-ribosyltransferase 1	protein-coding
4093	SMAD9	MADH6|MADH9|PPH2|SMAD8|SMAD8/9|SMAD8A|SMAD8B	MIM:603295|HGNC:HGNC:6774|Ensembl:ENSG00000120693|Vega:OTTHUMG00000016740	13q13.3	SMAD family member 9	protein-coding
408	ARRB1	ARB1|ARR1	MIM:107940|HGNC:HGNC:711|Ensembl:ENSG00000137486|Vega:OTTHUMG00000165444	11q13.4	arrestin beta 1	protein-coding
4067	LYN	JTK8|p53Lyn|p56Lyn	MIM:165120|HGNC:HGNC:6735|Ensembl:ENSG00000254087|Vega:OTTHUMG00000044345	8q12.1	LYN proto-oncogene, Src family tyrosine kinase	protein-coding
4052	LTBP1	-	MIM:150390|HGNC:HGNC:6714|Ensembl:ENSG00000049323|Vega:OTTHUMG00000152118	2p22.3	latent transforming growth factor beta binding protein 1	protein-coding
4040	LRP6	ADCAD2|STHAG7	MIM:603507|HGNC:HGNC:6698|Ensembl:ENSG00000070018	12p13.2	LDL receptor related protein 6	protein-coding
4001	LMNB1	ADLD|LMN|LMN2|LMNB	MIM:150340|HGNC:HGNC:6637|Ensembl:ENSG00000113368|Vega:OTTHUMG00000128969	5q23.2	lamin B1	protein-coding
3987	LIMS1	PINCH|PINCH-1|PINCH1	MIM:602567|HGNC:HGNC:6616|Ensembl:ENSG00000169756|Vega:OTTHUMG00000130983	2q12.3	LIM zinc finger domain containing 1	protein-coding
3976	LIF	CDF|DIA|HILDA|MLPLI	MIM:159540|HGNC:HGNC:6596|Ensembl:ENSG00000128342|Vega:OTTHUMG00000150910	22q12.2	LIF, interleukin 6 family cytokine	protein-coding
3965	LGALS9	HUAT|LGALS9A	MIM:601879|HGNC:HGNC:6570|Ensembl:ENSG00000168961|Vega:OTTHUMG00000179831	17q11.2	galectin 9	protein-coding
3918	LAMC2	B2T|BM600|CSF|EBR2|EBR2A|LAMB2T|LAMNB2	MIM:150292|HGNC:HGNC:6493|Ensembl:ENSG00000058085|Vega:OTTHUMG00000035520	1q25.3	laminin subunit gamma 2	protein-coding
391	RHOG	ARHG	MIM:179505|HGNC:HGNC:672|Ensembl:ENSG00000177105|Vega:OTTHUMG00000012287	11p15.4	ras homolog family member G	protein-coding
3880	KRT19	CK19|K19|K1CS	MIM:148020|HGNC:HGNC:6436|Ensembl:ENSG00000171345|Vega:OTTHUMG00000133422	17q21.2	keratin 19	protein-coding
388	RHOB	ARH6|ARHB|MST081|MSTP081|RHOH6	MIM:165370|HGNC:HGNC:668|Ensembl:ENSG00000143878|Vega:OTTHUMG00000090755	2p24.1	ras homolog family member B	protein-coding
387893	KMT5A	PR-Set7|SET07|SET8|SETD8	MIM:607240|HGNC:HGNC:29489|Ensembl:ENSG00000183955|Vega:OTTHUMG00000150477	12q24.31	lysine methyltransferase 5A	protein-coding
3875	KRT18	CK-18|CYK18|K18	MIM:148070|HGNC:HGNC:6430|Ensembl:ENSG00000111057|Vega:OTTHUMG00000169882	12q13.13	keratin 18	protein-coding
3872	KRT17	39.1|CK-17|K17|PC|PC2|PCHC1	MIM:148069|HGNC:HGNC:6427|Ensembl:ENSG00000128422|Vega:OTTHUMG00000133505	17q21.2	keratin 17	protein-coding
3856	KRT8	CARD2|CK-8|CK8|CYK8|K2C8|K8|KO	MIM:148060|HGNC:HGNC:6446|Ensembl:ENSG00000170421|Vega:OTTHUMG00000169881	12q13.13	keratin 8	protein-coding
3855	KRT7	CK7|K2C7|K7|SCL	MIM:148059|HGNC:HGNC:6445|Ensembl:ENSG00000135480|Vega:OTTHUMG00000169580	12q13.13	keratin 7	protein-coding
3799	KIF5B	HEL-S-61|KINH|KNS|KNS1|UKHC	MIM:602809|HGNC:HGNC:6324|Ensembl:ENSG00000170759|Vega:OTTHUMG00000017913	10p11.22	kinesin family member 5B	protein-coding
3791	KDR	CD309|FLK1|VEGFR|VEGFR2	MIM:191306|HGNC:HGNC:6307|Ensembl:ENSG00000128052|Vega:OTTHUMG00000128734	4q12	kinase insert domain receptor	protein-coding
3783	KCNN4	DHS2|IK|IK1|IKCA1|KCA4|KCa3.1|SK4|hIKCa1|hKCa4|hSK4	MIM:602754|HGNC:HGNC:6293|Ensembl:ENSG00000104783|Vega:OTTHUMG00000182779	19q13.31	potassium calcium-activated channel subfamily N member 4	protein-coding
3756	KCNH1	EAG|EAG1|Kv10.1|TMBTS|ZLS1|h-eag|hEAG1	MIM:603305|HGNC:HGNC:6250|Ensembl:ENSG00000143473|Vega:OTTHUMG00000036309	1q32.2	potassium voltage-gated channel subfamily H member 1	protein-coding
3718	JAK3	JAK-3|JAK3_HUMAN|JAKL|L-JAK|LJAK	MIM:600173|HGNC:HGNC:6193|Ensembl:ENSG00000105639|Vega:OTTHUMG00000165648	19p13.11	Janus kinase 3	protein-coding
3714	JAG2	HJ2|SER2	MIM:602570|HGNC:HGNC:6189|Ensembl:ENSG00000184916|Vega:OTTHUMG00000140172	14q32.33	jagged 2	protein-coding
3694	ITGB6	AI1H	MIM:147558|HGNC:HGNC:6161|Ensembl:ENSG00000115221|Vega:OTTHUMG00000132026	2q24.2	integrin subunit beta 6	protein-coding
3690	ITGB3	BDPLT16|BDPLT2|CD61|GP3A|GPIIIa|GT	MIM:173470|HGNC:HGNC:6156|Ensembl:ENSG00000259207|Ensembl:ENSG00000259753|Vega:OTTHUMG00000171956|Vega:OTTHUMG00000171957	17q21.32	integrin subunit beta 3	protein-coding
3667	IRS1	HIRS-1	MIM:147545|HGNC:HGNC:6125|Ensembl:ENSG00000169047|Vega:OTTHUMG00000133179	2q36.3	insulin receptor substrate 1	protein-coding
3664	IRF6	LPS|OFC6|PIT|PPS|PPS1|VWS|VWS1	MIM:607199|HGNC:HGNC:6121|Ensembl:ENSG00000117595|Vega:OTTHUMG00000036521	1q32.2	interferon regulatory factor 6	protein-coding
366	AQP9	AQP-9|HsT17287|SSC1|T17287	MIM:602914|HGNC:HGNC:643|Ensembl:ENSG00000103569|Vega:OTTHUMG00000132631	15q21.3	aquaporin 9	protein-coding
3655	ITGA6	CD49f|ITGA6B|VLA-6	MIM:147556|HGNC:HGNC:6142|Ensembl:ENSG00000091409|Vega:OTTHUMG00000132277	2q31.1	integrin subunit alpha 6	protein-coding
3607	FOXK2	ILF|ILF-1|ILF1	MIM:147685|HGNC:HGNC:6036|Ensembl:ENSG00000141568|Vega:OTTHUMG00000140374	17q25.3	forkhead box K2	protein-coding
3606	IL18	IGIF|IL-18|IL-1g|IL1F4	MIM:600953|HGNC:HGNC:5986|Ensembl:ENSG00000150782|Vega:OTTHUMG00000167006	11q23.1	interleukin 18	protein-coding
3570	IL6R	CD126|IL-6R-1|IL-6RA|IL6Q|IL6RA|IL6RQ|gp80	MIM:147880|HGNC:HGNC:6019|Ensembl:ENSG00000160712|Vega:OTTHUMG00000036073	1q21.3	interleukin 6 receptor	protein-coding
3565	IL4	BCGF-1|BCGF1|BSF-1|BSF1|IL-4	MIM:147780|HGNC:HGNC:6014|Ensembl:ENSG00000113520|Vega:OTTHUMG00000059724	5q31.1	interleukin 4	protein-coding
355	FAS	ALPS1A|APO-1|APT1|CD95|FAS1|FASTM|TNFRSF6	MIM:134637|HGNC:HGNC:11920|Ensembl:ENSG00000026103|Vega:OTTHUMG00000018701	10q23.31	Fas cell surface death receptor	protein-coding
3486	IGFBP3	BP-53|IBP3	MIM:146732|HGNC:HGNC:5472|Ensembl:ENSG00000146674|Vega:OTTHUMG00000023769	7p12.3	insulin like growth factor binding protein 3	protein-coding
348262	MCRIP1	FAM195B|GRAN2|MCRIP	MIM:616514|HGNC:HGNC:28007|Ensembl:ENSG00000225663|Vega:OTTHUMG00000177915	17q25.3	MAPK regulated corepressor interacting protein 1	protein-coding
345611	IRGM	IFI1|IRGM1|LRG-47|LRG47	MIM:608212|HGNC:HGNC:29597|Ensembl:ENSG00000237693|Vega:OTTHUMG00000163647	5q33.1	immunity related GTPase M	protein-coding
342977	NANOS3	NANOS1L|NOS3|ZC2HC12C	MIM:608229|HGNC:HGNC:22048|Ensembl:ENSG00000187556|Vega:OTTHUMG00000181850	19p13.12	nanos C2HC-type zinc finger 3	protein-coding
3418	IDH2	D2HGA2|ICD-M|IDH|IDHM|IDP|IDPM|mNADP-IDH	MIM:147650|HGNC:HGNC:5383|Ensembl:ENSG00000182054|Vega:OTTHUMG00000149815	15q26.1	isocitrate dehydrogenase (NADP(+)) 2, mitochondrial	protein-coding
3417	IDH1	HEL-216|HEL-S-26|IDCD|IDH|IDP|IDPC|PICD	MIM:147700|HGNC:HGNC:5382|Ensembl:ENSG00000138413|Vega:OTTHUMG00000132943	2q34	isocitrate dehydrogenase (NADP(+)) 1, cytosolic	protein-coding
3398	ID2	GIG8|ID2A|ID2H|bHLHb26	MIM:600386|HGNC:HGNC:5361|Ensembl:ENSG00000115738|Vega:OTTHUMG00000112454	2p25.1	inhibitor of DNA binding 2, HLH protein	protein-coding
3394	IRF8	H-ICSBP|ICSBP|ICSBP1|IMD32A|IMD32B|IRF-8	MIM:601565|HGNC:HGNC:5358|Ensembl:ENSG00000140968|Vega:OTTHUMG00000137648	16q24.1	interferon regulatory factor 8	protein-coding
339122	RAB43	RAB11B|RAB41	HGNC:HGNC:19983|Ensembl:ENSG00000172780|Vega:OTTHUMG00000137364	3q21.3	RAB43, member RAS oncogene family	protein-coding
3346	HTN1	HIS1	MIM:142701|HGNC:HGNC:5283|Ensembl:ENSG00000126550|Vega:OTTHUMG00000129397	4q13.3	histatin 1	protein-coding
3320	HSP90AA1	EL52|HEL-S-65p|HSP86|HSP89A|HSP90A|HSP90N|HSPC1|HSPCA|HSPCAL1|HSPCAL4|HSPN|Hsp103|Hsp89|Hsp90|LAP-2|LAP2	MIM:140571|HGNC:HGNC:5253|Ensembl:ENSG00000080824|Vega:OTTHUMG00000171752	14q32.31	heat shock protein 90 alpha family class A member 1	protein-coding
3316	HSPB2	HSP27|Hs.78846|LOH11CR1K|MKBP	MIM:602179|HGNC:HGNC:5247|Ensembl:ENSG00000170276|Ensembl:ENSG00000254445|Vega:OTTHUMG00000166886|Vega:OTTHUMG00000166887	11q23.1	heat shock protein family B (small) member 2	protein-coding
329	BIRC2	API1|HIAP2|Hiap-2|MIHB|RNF48|c-IAP1|cIAP1	MIM:601712|HGNC:HGNC:590|Ensembl:ENSG00000110330|Vega:OTTHUMG00000167325	11q22.2	baculoviral IAP repeat containing 2	protein-coding
3273	HRG	HPRG|HRGP|THPH11	MIM:142640|HGNC:HGNC:5181|Ensembl:ENSG00000113905|Vega:OTTHUMG00000156578	3q27.3	histidine rich glycoprotein	protein-coding
3248	HPGD	15-PGDH|PGDH|PGDH1|PHOAR1|SDR36C1	MIM:601688|HGNC:HGNC:5154|Ensembl:ENSG00000164120|Vega:OTTHUMG00000160772	4q34.1	hydroxyprostaglandin dehydrogenase 15-(NAD)	protein-coding
3235	HOXD9	HOX4|HOX4C|Hox-4.3|Hox-5.2	MIM:142982|HGNC:HGNC:5140|Ensembl:ENSG00000128709|Vega:OTTHUMG00000132516	2q31.1	homeobox D9	protein-coding
322	APBB1	FE65|MGC:9072|RIR	MIM:602709|HGNC:HGNC:581|Ensembl:ENSG00000166313|Vega:OTTHUMG00000165454	11p15.4	amyloid beta precursor protein binding family B member 1	protein-coding
3205	HOXA9	ABD-B|HOX1|HOX1.7|HOX1G	MIM:142956|HGNC:HGNC:5109|Ensembl:ENSG00000078399|Vega:OTTHUMG00000023220	7p15.2	homeobox A9	protein-coding
3182	HNRNPAB	ABBP1|HNRPAB	MIM:602688|HGNC:HGNC:5034|Ensembl:ENSG00000197451|Vega:OTTHUMG00000163452	5q35.3	heterogeneous nuclear ribonucleoprotein A/B	protein-coding
3164	NR4A1	GFRP1|HMR|N10|NAK-1|NGFIB|NP10|NUR77|TR3	MIM:139139|HGNC:HGNC:7980|Ensembl:ENSG00000123358|Vega:OTTHUMG00000150393	12q13.13	nuclear receptor subfamily 4 group A member 1	protein-coding
3099	HK2	HKII|HXK2	MIM:601125|HGNC:HGNC:4923|Ensembl:ENSG00000159399|Vega:OTTHUMG00000129972	2p12	hexokinase 2	protein-coding
3092	HIP1	HIP-I|ILWEQ|SHON|SHONbeta|SHONgamma	MIM:601767|HGNC:HGNC:4913|Ensembl:ENSG00000127946|Vega:OTTHUMG00000156050	7q11.23	huntingtin interacting protein 1	protein-coding
30846	EHD2	PAST2	MIM:605890|HGNC:HGNC:3243|Ensembl:ENSG00000024422|Vega:OTTHUMG00000183266	19q13.33	EH domain containing 2	protein-coding
308	ANXA5	ANX5|ENX2|HEL-S-7|PP4|RPRGL3	MIM:131230|HGNC:HGNC:543|Ensembl:ENSG00000164111|Vega:OTTHUMG00000133034	4q27	annexin A5	protein-coding
3015	H2AFZ	H2A.Z-1|H2A.z|H2A/z|H2AZ	MIM:142763|HGNC:HGNC:4741|Ensembl:ENSG00000164032|Vega:OTTHUMG00000131048	4q23	H2A histone family member Z	protein-coding
301	ANXA1	ANX1|LPC1	MIM:151690|HGNC:HGNC:533|Ensembl:ENSG00000135046|Vega:OTTHUMG00000020016	9q21.13	annexin A1	protein-coding
29803	REPIN1	AP4|RIP60|ZNF464|Zfp464	HGNC:HGNC:17922|Ensembl:ENSG00000214022|Vega:OTTHUMG00000158330	7q36.1	replication initiator 1	protein-coding
29789	OLA1	DOC45|GBP45|GTBP9|GTPBP9|PTD004	MIM:611175|HGNC:HGNC:28833|Ensembl:ENSG00000138430|Vega:OTTHUMG00000132335	2q31.1	Obg like ATPase 1	protein-coding
29775	CARD10	BIMP1|CARMA3	MIM:607209|HGNC:HGNC:16422|Ensembl:ENSG00000100065|Vega:OTTHUMG00000150592	22q13.1	caspase recruitment domain family member 10	protein-coding
2931	GSK3A	-	MIM:606784|HGNC:HGNC:4616|Ensembl:ENSG00000105723|Vega:OTTHUMG00000150722	19q13.2	glycogen synthase kinase 3 alpha	protein-coding
29117	BRD7	BP75|CELTIX1|NAG4	HGNC:HGNC:14310|Ensembl:ENSG00000166164|Vega:OTTHUMG00000133170	16q12.1	bromodomain containing 7	protein-coding
29110	TBK1	FTDALS4|NAK|T2K	MIM:604834|HGNC:HGNC:11584|Ensembl:ENSG00000183735|Vega:OTTHUMG00000168796	12q14.2	TANK binding kinase 1	protein-coding
29109	FHOD1	FHOS	MIM:606881|HGNC:HGNC:17905|Ensembl:ENSG00000135723|Vega:OTTHUMG00000137521	16q22.1	formin homology 2 domain containing 1	protein-coding
2902	GRIN1	GluN1|MRD8|NMD-R1|NMDA1|NMDAR1|NR1	MIM:138249|HGNC:HGNC:4584|Ensembl:ENSG00000176884|Vega:OTTHUMG00000020976	9q34.3	glutamate ionotropic receptor NMDA type subunit 1	protein-coding
290	ANPEP	APN|CD13|GP150|LAP1|P150|PEPN	MIM:151530|HGNC:HGNC:500|Ensembl:ENSG00000166825|Vega:OTTHUMG00000149814	15q26.1	alanyl aminopeptidase, membrane	protein-coding
284217	LAMA1	LAMA|PTBHS|S-LAM-alpha	MIM:150320|HGNC:HGNC:6481|Ensembl:ENSG00000101680|Vega:OTTHUMG00000133478	18p11.31	laminin subunit alpha 1	protein-coding
284119	CAVIN1	CAVIN|CGL4|FKSG13|PTRF|cavin-1	MIM:603198|HGNC:HGNC:9688|Ensembl:ENSG00000177469|Vega:OTTHUMG00000180137	17q21.2	caveolae associated protein 1	protein-coding
2821	GPI	AMF|GNPI|NLK|PGI|PHI|SA-36|SA36	MIM:172400|HGNC:HGNC:4458|Ensembl:ENSG00000105220|Vega:OTTHUMG00000182087	19q13.11	glucose-6-phosphate isomerase	protein-coding
2801	GOLGA2	GM130	MIM:602580|HGNC:HGNC:4425|Ensembl:ENSG00000167110|Vega:OTTHUMG00000020732	9q34.11	golgin A2	protein-coding
2745	GLRX	GRX|GRX1	MIM:600443|HGNC:HGNC:4330|Ensembl:ENSG00000173221|Vega:OTTHUMG00000121167	5q15	glutaredoxin	protein-coding
2744	GLS	AAD20|GAC|GAM|GLS1|KGA	MIM:138280|HGNC:HGNC:4331|Ensembl:ENSG00000115419|Vega:OTTHUMG00000132701	2q32.2	glutaminase	protein-coding
27436	EML4	C2orf2|ELP120|EMAP-4|EMAPL4|ROPP120	MIM:607442|HGNC:HGNC:1316|Ensembl:ENSG00000143924|Vega:OTTHUMG00000128603	2p21	echinoderm microtubule associated protein like 4	protein-coding
2739	GLO1	GLOD1|GLYI|HEL-S-74	MIM:138750|HGNC:HGNC:4323|Ensembl:ENSG00000124767|Vega:OTTHUMG00000014636	6p21.2	glyoxalase I	protein-coding
27165	GLS2	GA|GLS|LGA|hLGA	MIM:606365|HGNC:HGNC:29570|Ensembl:ENSG00000135423|Vega:OTTHUMG00000140379	12q13.3	glutaminase 2	protein-coding
27161	AGO2	CASC7|EIF2C2|LINC00980|PPD|Q10	MIM:606229|HGNC:HGNC:3263|Ensembl:ENSG00000123908|Vega:OTTHUMG00000164232	8q24.3	argonaute 2, RISC catalytic component	protein-coding
27122	DKK3	REIC|RIG	MIM:605416|HGNC:HGNC:2893|Ensembl:ENSG00000050165|Vega:OTTHUMG00000165709	11p15.3	dickkopf WNT signaling pathway inhibitor 3	protein-coding
27113	BBC3	JFY-1|JFY1|PUMA	MIM:605854|HGNC:HGNC:17868|Ensembl:ENSG00000105327|Vega:OTTHUMG00000183489	19q13.32	BCL2 binding component 3	protein-coding
27076	LYPD3	C4.4A	MIM:609484|HGNC:HGNC:24880|Ensembl:ENSG00000124466|Vega:OTTHUMG00000182696	19q13.31	LY6/PLAUR domain containing 3	protein-coding
2706	GJB2	CX26|DFNA3|DFNA3A|DFNB1|DFNB1A|HID|KID|NSRD1|PPK	MIM:121011|HGNC:HGNC:4284|Ensembl:ENSG00000165474|Vega:OTTHUMG00000016513	13q12.11	gap junction protein beta 2	protein-coding
269	AMHR2	AMHR|MISR2|MISRII|MRII	MIM:600956|HGNC:HGNC:465|Ensembl:ENSG00000135409|Vega:OTTHUMG00000170048	12q13.13	anti-Mullerian hormone receptor type 2	protein-coding
2688	GH1	GH|GH-N|GHB5|GHN|IGHD1B|hGH-N	MIM:139250|HGNC:HGNC:4261|Ensembl:ENSG00000259384|Vega:OTTHUMG00000172293	17q23.3	growth hormone 1	protein-coding
2627	GATA6	-	MIM:601656|HGNC:HGNC:4174|Ensembl:ENSG00000141448|Vega:OTTHUMG00000131767	18q11.2	GATA binding protein 6	protein-coding
2623	GATA1	ERYF1|GATA-1|GF-1|GF1|NF-E1|NFE1|XLANP|XLTDA|XLTT	MIM:305371|HGNC:HGNC:4170|Ensembl:ENSG00000102145|Vega:OTTHUMG00000021504	Xp11.23	GATA binding protein 1	protein-coding
2597	GAPDH	G3PD|GAPD|HEL-S-162eP	MIM:138400|HGNC:HGNC:4141|Ensembl:ENSG00000111640|Vega:OTTHUMG00000137379	12p13.31	glyceraldehyde-3-phosphate dehydrogenase	protein-coding
25942	SIN3A	WITKOS	MIM:607776|HGNC:HGNC:19353|Ensembl:ENSG00000169375|Vega:OTTHUMG00000142834	15q24.2	SIN3 transcription regulator family member A	protein-coding
25875	LETMD1	1110019O13Rik|HCCR|HCCR-1|HCCR-2|HCCR1|HCCR2|HCRR-2	HGNC:HGNC:24241|Ensembl:ENSG00000050426|Vega:OTTHUMG00000169538	12q13.12	LETM1 domain containing 1	protein-coding
25855	BRMS1	-	MIM:606259|HGNC:HGNC:17262|Ensembl:ENSG00000174744|Vega:OTTHUMG00000167081	11q13.2	breast cancer metastasis suppressor 1	protein-coding
25852	ARMC8	GID5|HSPC056|S863-2|VID28	HGNC:HGNC:24999|Ensembl:ENSG00000114098|Vega:OTTHUMG00000159821	3q22.3	armadillo repeat containing 8	protein-coding
25828	TXN2	COXPD29|MT-TRX|MTRX|TRX2|TXN	MIM:609063|HGNC:HGNC:17772|Ensembl:ENSG00000100348|Vega:OTTHUMG00000150596	22q12.3	thioredoxin 2	protein-coding
25803	SPDEF	PDEF|bA375E1.3	MIM:608144|HGNC:HGNC:17257|Ensembl:ENSG00000124664|Vega:OTTHUMG00000014548	6p21.31	SAM pointed domain containing ETS transcription factor	protein-coding
25794	FSCN2	RFSN|RP30	MIM:607643|HGNC:HGNC:3960|Ensembl:ENSG00000186765|Vega:OTTHUMG00000167477	17q25.3	fascin actin-bundling protein 2, retinal	protein-coding
25776	CBY1	C22orf2|CBY|HS508I15A|PGEA1|PIGEA-14|PIGEA14|arb1	MIM:607757|HGNC:HGNC:1307|Ensembl:ENSG00000100211|Vega:OTTHUMG00000150990	22q13.1	chibby family member 1, beta catenin antagonist	protein-coding
253782	CERS6	CERS5|LASS6	MIM:615336|HGNC:HGNC:23826|Ensembl:ENSG00000172292|Vega:OTTHUMG00000132183	2q24.3	ceramide synthase 6	protein-coding
2494	NR5A2	B1F|B1F2|CPF|FTF|FTZ-F1|FTZ-F1beta|LRH-1|LRH1|hB1F-2	MIM:604453|HGNC:HGNC:7984|Ensembl:ENSG00000116833|Vega:OTTHUMG00000035635	1q32.1	nuclear receptor subfamily 5 group A member 2	protein-coding
2492	FSHR	FSHR1|FSHRO|LGR1|ODG1	MIM:136435|HGNC:HGNC:3969|Ensembl:ENSG00000170820|Vega:OTTHUMG00000129259	2p16.3	follicle stimulating hormone receptor	protein-coding
246778	IL27	IL-27|IL-27A|IL27A|IL27p28|IL30|p28	MIM:608273|HGNC:HGNC:19157|Ensembl:ENSG00000197272|Vega:OTTHUMG00000097023	16p12.1-p11.2	interleukin 27	protein-coding
23613	ZMYND8	PRKCBP1|PRO2893|RACK7	MIM:615713|HGNC:HGNC:9397|Ensembl:ENSG00000101040|Vega:OTTHUMG00000032667	20q13.12	zinc finger MYND-type containing 8	protein-coding
23582	CCNDBP1	DIP1|GCIP|HHM	MIM:607089|HGNC:HGNC:1587|Ensembl:ENSG00000166946|Vega:OTTHUMG00000130703	15q15.2	cyclin D1 binding protein 1	protein-coding
23569	PADI4	PAD|PAD4|PADI5|PDI4|PDI5	MIM:605347|HGNC:HGNC:18368|Ensembl:ENSG00000159339|Vega:OTTHUMG00000002371	1p36.13	peptidyl arginine deiminase 4	protein-coding
23531	MMD	MMA|MMD1|PAQR11	MIM:604467|HGNC:HGNC:7153|Ensembl:ENSG00000108960|Vega:OTTHUMG00000177845	17q22	monocyte to macrophage differentiation associated	protein-coding
23513	SCRIB	CRIB1|SCRB1|SCRIB1|Vartul	MIM:607733|HGNC:HGNC:30377|Ensembl:ENSG00000180900|Vega:OTTHUMG00000165154	8q24.3	scribbled planar cell polarity protein	protein-coding
23512	SUZ12	CHET9|JJAZ1	MIM:606245|HGNC:HGNC:17101|Ensembl:ENSG00000178691|Vega:OTTHUMG00000132813	17q11.2	SUZ12 polycomb repressive complex 2 subunit	protein-coding
23385	NCSTN	ATAG1874	MIM:605254|HGNC:HGNC:17091|Ensembl:ENSG00000162736|Vega:OTTHUMG00000033110	1q23.2	nicastrin	protein-coding
23365	ARHGEF12	LARG|PRO2792	MIM:604763|HGNC:HGNC:14193|Ensembl:ENSG00000196914|Vega:OTTHUMG00000166143	11q23.3	Rho guanine nucleotide exchange factor 12	protein-coding
23327	NEDD4L	NEDD4-2|NEDD4.2|PVNH7|RSP5|hNEDD4-2	MIM:606384|HGNC:HGNC:7728|Ensembl:ENSG00000049759|Vega:OTTHUMG00000179875	18q21.31	neural precursor cell expressed, developmentally down-regulated 4-like, E3 ubiquitin protein ligase	protein-coding
2332	FMR1	FMRP|FRAXA|POF|POF1	MIM:309550|HGNC:HGNC:3775|Ensembl:ENSG00000102081|Vega:OTTHUMG00000022606	Xq27.3	fragile X mental retardation 1	protein-coding
23265	EXOC7	2-5-3p|BLOM4|EX070|EXO70|EXOC1|Exo70p|YJL085W	MIM:608163|HGNC:HGNC:23214|Ensembl:ENSG00000182473|Vega:OTTHUMG00000150720	17q25.1	exocyst complex component 7	protein-coding
2321	FLT1	FLT|FLT-1|VEGFR-1|VEGFR1	MIM:165070|HGNC:HGNC:3763|Ensembl:ENSG00000102755|Vega:OTTHUMG00000016648	13q12.3	fms related tyrosine kinase 1	protein-coding
2316	FLNA	ABP-280|ABPX|CSBS|CVD1|FLN|FLN-A|FLN1|FMD|MNS|NHBP|OPD|OPD1|OPD2|XLVD|XMVD	MIM:300017|HGNC:HGNC:3754|Ensembl:ENSG00000196924|Vega:OTTHUMG00000022712	Xq28	filamin A	protein-coding
23135	KDM6B	JMJD3	MIM:611577|HGNC:HGNC:29012|Ensembl:ENSG00000132510|Vega:OTTHUMG00000178021	17p13.1	lysine demethylase 6B	protein-coding
23129	PLXND1	PLEXD1	MIM:604282|HGNC:HGNC:9107|Ensembl:ENSG00000004399|Vega:OTTHUMG00000159547	3q22.1	plexin D1	protein-coding
23089	PEG10	EDR|HB-1|MEF3L|Mar2|Mart2|RGAG3|RTL2|SIRH1	MIM:609810|HGNC:HGNC:14005|Ensembl:ENSG00000242265|Vega:OTTHUMG00000155578	7q21.3	paternally expressed 10	protein-coding
22938	SNW1	Bx42|FUN20|NCOA-62|PRPF45|Prp45|SKIIP|SKIP|SKIP1	MIM:603055|HGNC:HGNC:16696|Ensembl:ENSG00000100603|Vega:OTTHUMG00000171527	14q24.3	SNW domain containing 1	protein-coding
229	ALDOB	ALDB|ALDO2	MIM:612724|HGNC:HGNC:417|Ensembl:ENSG00000136872|Vega:OTTHUMG00000020378	9q31.1	aldolase, fructose-bisphosphate B	protein-coding
22897	CEP164	NPHP15	MIM:614848|HGNC:HGNC:29182|Ensembl:ENSG00000110274|Vega:OTTHUMG00000167070	11q23.3	centrosomal protein 164	protein-coding
2289	FKBP5	AIG6|FKBP51|FKBP54|P54|PPIase|Ptg-10	MIM:602623|HGNC:HGNC:3721|Ensembl:ENSG00000096060|Vega:OTTHUMG00000014576	6p21.31	FK506 binding protein 5	protein-coding
22822	PHLDA1	DT1P1B11|PHRIP|TDAG51	MIM:605335|HGNC:HGNC:8933|Ensembl:ENSG00000139289|Vega:OTTHUMG00000169783	12q21.2	pleckstrin homology like domain family A member 1	protein-coding
22803	XRN2	-	MIM:608851|HGNC:HGNC:12836|Ensembl:ENSG00000088930|Vega:OTTHUMG00000032025	20p11.22	5'-3' exoribonuclease 2	protein-coding
2274	FHL2	AAG11|DRAL|FHL-2|SLIM-3|SLIM3	MIM:602633|HGNC:HGNC:3703|Ensembl:ENSG00000115641|Vega:OTTHUMG00000153120	2q12.2	four and a half LIM domains 2	protein-coding
2273	FHL1	FHL-1|FHL1A|FHL1B|FLH1A|KYOT|RBMX1A|RBMX1B|SLIM|SLIM-1|SLIM1|SLIMMER|XMPMA	MIM:300163|HGNC:HGNC:3702|Ensembl:ENSG00000022267|Vega:OTTHUMG00000022504	Xq26.3	four and a half LIM domains 1	protein-coding
222663	SCUBE3	CEGF3	MIM:614708|HGNC:HGNC:13655|Ensembl:ENSG00000146197|Vega:OTTHUMG00000014562	6p21.31	signal peptide, CUB domain and EGF like domain containing 3	protein-coding
2220	FCN2	EBP-37|FCNL|P35|ficolin-2	MIM:601624|HGNC:HGNC:3624|Ensembl:ENSG00000160339|Vega:OTTHUMG00000020892	9q34.3	ficolin 2	protein-coding
2203	FBP1	FBP	MIM:611570|HGNC:HGNC:3606|Ensembl:ENSG00000165140|Vega:OTTHUMG00000020268	9q22.32	fructose-bisphosphatase 1	protein-coding
2194	FASN	FAS|OA-519|SDR27X1	MIM:600212|HGNC:HGNC:3594|Ensembl:ENSG00000169710|Vega:OTTHUMG00000178527	17q25.3	fatty acid synthase	protein-coding
2192	FBLN1	FBLN|FIBL1	MIM:135820|HGNC:HGNC:3600|Ensembl:ENSG00000077942|Vega:OTTHUMG00000151340	22q13.31	fibulin 1	protein-coding
216	ALDH1A1	ALDC|ALDH-E1|ALDH1|ALDH11|HEL-9|HEL-S-53e|HEL12|PUMB1|RALDH1	MIM:100640|HGNC:HGNC:402|Ensembl:ENSG00000165092|Vega:OTTHUMG00000020019	9q21.13	aldehyde dehydrogenase 1 family member A1	protein-coding
2152	F3	CD142|TF|TFA	MIM:134390|HGNC:HGNC:3541|Ensembl:ENSG00000117525|Vega:OTTHUMG00000010716	1p21.3	coagulation factor III, tissue factor	protein-coding
2151	F2RL2	PAR-3|PAR3	MIM:601919|HGNC:HGNC:3539|Ensembl:ENSG00000164220|Vega:OTTHUMG00000102119	5q13.3	coagulation factor II thrombin receptor like 2	protein-coding
2147	F2	PT|RPRGL2|THPH1	MIM:176930|HGNC:HGNC:3535|Ensembl:ENSG00000180210|Vega:OTTHUMG00000150344	11p11.2	coagulation factor II, thrombin	protein-coding
2115	ETV1	ER81	MIM:600541|HGNC:HGNC:3490|Ensembl:ENSG00000006468|Vega:OTTHUMG00000152403	7p21.2	ETS variant 1	protein-coding
2114	ETS2	ETS2IT1	MIM:164740|HGNC:HGNC:3489|Ensembl:ENSG00000157557|Vega:OTTHUMG00000090769	21q22.2	ETS proto-oncogene 2, transcription factor	protein-coding
2113	ETS1	ETS-1|EWSR2|c-ets-1|p54	MIM:164720|HGNC:HGNC:3488|Ensembl:ENSG00000134954|Vega:OTTHUMG00000165799	11q24.3	ETS proto-oncogene 1, transcription factor	protein-coding
2103	ESRRB	DFNB35|ERR2|ERRb|ESRL2|NR3B2	MIM:602167|HGNC:HGNC:3473|Ensembl:ENSG00000119715|Vega:OTTHUMG00000160457	14q24.3	estrogen related receptor beta	protein-coding
210	ALAD	ALADH|PBGS	MIM:125270|HGNC:HGNC:395|Ensembl:ENSG00000148218|Vega:OTTHUMG00000020522	9q32	aminolevulinate dehydratase	protein-coding
2081	ERN1	IRE1|IRE1P|IRE1a|hIRE1p	MIM:604033|HGNC:HGNC:3449|Ensembl:ENSG00000178607|Vega:OTTHUMG00000178879	17q23.3	endoplasmic reticulum to nucleus signaling 1	protein-coding
2077	ERF	CHYTS|CRS4|PE-2|PE2	MIM:611888|HGNC:HGNC:3444|Ensembl:ENSG00000105722|Vega:OTTHUMG00000182788	19q13.2	ETS2 repressor factor	protein-coding
2049	EPHB3	EK2|ETK2|HEK2|TYRO6	MIM:601839|HGNC:HGNC:3394|Ensembl:ENSG00000182580|Vega:OTTHUMG00000156710	3q27.1	EPH receptor B3	protein-coding
2046	EPHA8	EEK|EK3|HEK3	MIM:176945|HGNC:HGNC:3391|Ensembl:ENSG00000070886|Vega:OTTHUMG00000002892	1p36.12	EPH receptor A8	protein-coding
2043	EPHA4	HEK8|SEK|TYRO1	MIM:602188|HGNC:HGNC:3388|Ensembl:ENSG00000116106|Vega:OTTHUMG00000133142	2q36.1	EPH receptor A4	protein-coding
2033	EP300	KAT3B|RSTS2|p300	MIM:602700|HGNC:HGNC:3373|Ensembl:ENSG00000100393|Vega:OTTHUMG00000150937	22q13.2	E1A binding protein p300	protein-coding
2023	ENO1	ENO1L1|HEL-S-17|MPB1|NNE|PPH	MIM:172430|HGNC:HGNC:3350|Ensembl:ENSG00000074800|Vega:OTTHUMG00000001773	1p36.23	enolase 1	protein-coding
2022	ENG	END|HHT1|ORW1	MIM:131195|HGNC:HGNC:3349|Ensembl:ENSG00000106991|Vega:OTTHUMG00000020723	9q34.11	endoglin	protein-coding
2014	EMP3	YMP	MIM:602335|HGNC:HGNC:3335|Ensembl:ENSG00000142227|Vega:OTTHUMG00000183196	19q13.33	epithelial membrane protein 3	protein-coding
200933	FBXO45	Fbx45	MIM:609112|HGNC:HGNC:29148|Ensembl:ENSG00000174013|Vega:OTTHUMG00000155571	3q29	F-box protein 45	protein-coding
200916	RPL22L1	-	HGNC:HGNC:27610|Ensembl:ENSG00000163584|Vega:OTTHUMG00000158957	3q26.2	ribosomal protein L22 like 1	protein-coding
2004	ELK3	ERP|NET|SAP-2|SAP2	MIM:600247|HGNC:HGNC:3325|Ensembl:ENSG00000111145|Vega:OTTHUMG00000170364	12q23.1	ELK3, ETS transcription factor	protein-coding
2002	ELK1	-	MIM:311040|HGNC:HGNC:3321|Ensembl:ENSG00000126767|Vega:OTTHUMG00000021452	Xp11.23	ELK1, ETS transcription factor	protein-coding
199974	CYP4Z1	CYP4A20	HGNC:HGNC:20583|Ensembl:ENSG00000186160|Vega:OTTHUMG00000008019	1p33	cytochrome P450 family 4 subfamily Z member 1	protein-coding
1994	ELAVL1	ELAV1|HUR|Hua|MelG	MIM:603466|HGNC:HGNC:3312|Ensembl:ENSG00000066044|Vega:OTTHUMG00000182470	19p13.2	ELAV like RNA binding protein 1	protein-coding
1984	EIF5A	EIF-5A|EIF5A1|eIF5AI	MIM:600187|HGNC:HGNC:3300|Ensembl:ENSG00000132507|Vega:OTTHUMG00000102197	17p13.1	eukaryotic translation initiation factor 5A	protein-coding
1981	EIF4G1	EIF-4G1|EIF4F|EIF4G|EIF4GI|P220|PARK18	MIM:600495|HGNC:HGNC:3296|Ensembl:ENSG00000114867|Vega:OTTHUMG00000156784	3q27.1	eukaryotic translation initiation factor 4 gamma 1	protein-coding
1977	EIF4E	AUTS19|CBP|EIF4E1|EIF4EL1|EIF4F|eIF-4E	MIM:133440|HGNC:HGNC:3287|Ensembl:ENSG00000151247|Vega:OTTHUMG00000161090	4q23	eukaryotic translation initiation factor 4E	protein-coding
1965	EIF2S1	EIF-2|EIF-2A|EIF-2alpha|EIF2|EIF2A	MIM:603907|HGNC:HGNC:3265|Ensembl:ENSG00000134001|Vega:OTTHUMG00000029800	14q23.3	eukaryotic translation initiation factor 2 subunit alpha	protein-coding
1948	EFNB2	EPLG5|HTKL|Htk-L|LERK5	MIM:600527|HGNC:HGNC:3227|Ensembl:ENSG00000125266|Vega:OTTHUMG00000017324	13q33.3	ephrin B2	protein-coding
1936	EEF1D	EF-1D|EF1D|FP1047	MIM:130592|HGNC:HGNC:3211|Ensembl:ENSG00000104529|Vega:OTTHUMG00000165191	8q24.3	eukaryotic translation elongation factor 1 delta	protein-coding
1909	EDNRA	ET-A|ETA|ETA-R|ETAR|ETRA|MFDA|hET-AR	MIM:131243|HGNC:HGNC:3179|Ensembl:ENSG00000151617|Vega:OTTHUMG00000161354	4q31.22-q31.23	endothelin receptor type A	protein-coding
1894	ECT2	ARHGEF31	MIM:600586|HGNC:HGNC:3155|Ensembl:ENSG00000114346|Vega:OTTHUMG00000156762	3q26.31	epithelial cell transforming 2	protein-coding
1856	DVL2	-	MIM:602151|HGNC:HGNC:3086|Ensembl:ENSG00000004975|Vega:OTTHUMG00000102155	17p13.1	dishevelled segment polarity protein 2	protein-coding
185	AGTR1	AG2S|AGTR1B|AT1|AT1AR|AT1B|AT1BR|AT1R|AT2R1|HAT1R	MIM:106165|HGNC:HGNC:336|Ensembl:ENSG00000144891|Vega:OTTHUMG00000159503	3q24	angiotensin II receptor type 1	protein-coding
1789	DNMT3B	ICF|ICF1|M.HsaIIIB	MIM:602900|HGNC:HGNC:2979|Ensembl:ENSG00000088305|Vega:OTTHUMG00000032226	20q11.21	DNA methyltransferase 3 beta	protein-coding
1655	DDX5	G17P1|HLR1|HUMP68|p68	MIM:180630|HGNC:HGNC:2746|Ensembl:ENSG00000108654|Vega:OTTHUMG00000178936	17q23.3	DEAD-box helicase 5	protein-coding
1612	DAPK1	DAPK|ROCO3	MIM:600831|HGNC:HGNC:2674|Ensembl:ENSG00000196730|Vega:OTTHUMG00000020150	9q21.33	death associated protein kinase 1	protein-coding
1577	CYP3A5	CP35|CYPIIIA5|P450PCN3|PCN3	MIM:605325|HGNC:HGNC:2638|Ensembl:ENSG00000106258|Vega:OTTHUMG00000156724	7q22.1	cytochrome P450 family 3 subfamily A member 5	protein-coding
157310	PEBP4	CORK-1|CORK1|GWTM1933|HEL-S-300|PEBP-4|PRO4408|hPEBP4	MIM:612473|HGNC:HGNC:28319|Ensembl:ENSG00000134020|Vega:OTTHUMG00000163749	8p21.3	phosphatidylethanolamine binding protein 4	protein-coding
155061	ZNF746	PARIS	MIM:613914|HGNC:HGNC:21948|Ensembl:ENSG00000181220|Vega:OTTHUMG00000158972	7q36.1	zinc finger protein 746	protein-coding
1545	CYP1B1	ASGD6|CP1B|CYPIB1|GLC3A|P4501B1	MIM:601771|HGNC:HGNC:2597|Ensembl:ENSG00000138061|Vega:OTTHUMG00000100970	2p22.2	cytochrome P450 family 1 subfamily B member 1	protein-coding
152189	CMTM8	CKLFSF8|CKLFSF8-V2	MIM:607891|HGNC:HGNC:19179|Ensembl:ENSG00000170293|Vega:OTTHUMG00000130753	3p22.3	CKLF like MARVEL transmembrane domain containing 8	protein-coding
1464	CSPG4	HMW-MAA|MCSP|MCSPG|MEL-CSPG|MSK16|NG2	MIM:601172|HGNC:HGNC:2466|Ensembl:ENSG00000173546|Vega:OTTHUMG00000142836	15q24.2	chondroitin sulfate proteoglycan 4	protein-coding
1462	VCAN	CSPG2|ERVR|GHAP|PG-M|WGN|WGN1	MIM:118661|HGNC:HGNC:2464|Ensembl:ENSG00000038427|Vega:OTTHUMG00000131321	5q14.2-q14.3	versican	protein-coding
1445	CSK	-	MIM:124095|HGNC:HGNC:2444|Ensembl:ENSG00000103653|Vega:OTTHUMG00000142814	15q24.1	C-terminal Src kinase	protein-coding
1437	CSF2	GMCSF	MIM:138960|HGNC:HGNC:2434|Ensembl:ENSG00000164400|Vega:OTTHUMG00000059637	5q31.1	colony stimulating factor 2	protein-coding
1401	CRP	PTX1	MIM:123260|HGNC:HGNC:2367|Ensembl:ENSG00000132693|Vega:OTTHUMG00000035344	1q23.2	C-reactive protein	protein-coding
1400	CRMP1	CRMP-1|DPYSL1|DRP-1|DRP1|ULIP-3	MIM:602462|HGNC:HGNC:2365|Ensembl:ENSG00000072832|Vega:OTTHUMG00000125489	4p16.2	collapsin response mediator protein 1	protein-coding
139628	FOXR2	FOXN6	MIM:300949|HGNC:HGNC:30469|Ensembl:ENSG00000189299|Vega:OTTHUMG00000021661	Xp11.21	forkhead box R2	protein-coding
1387	CREBBP	CBP|KAT3A|RSTS|RSTS1	MIM:600140|HGNC:HGNC:2348|Ensembl:ENSG00000005339|Vega:OTTHUMG00000129431	16p13.3	CREB binding protein	protein-coding
133	ADM	AM|PAMP	MIM:103275|HGNC:HGNC:259|Ensembl:ENSG00000148926|Vega:OTTHUMG00000165907	11p15.4	adrenomedullin	protein-coding
1316	KLF6	BCD1|CBA1|COPEB|CPBP|GBF|PAC1|ST12|ZF9	MIM:602053|HGNC:HGNC:2235|Ensembl:ENSG00000067082|Vega:OTTHUMG00000017567	10p15.2	Kruppel like factor 6	protein-coding
1296	COL8A2	FECD|FECD1|PPCD|PPCD2	MIM:120252|HGNC:HGNC:2216|Ensembl:ENSG00000171812|Vega:OTTHUMG00000007665	1p34.3	collagen type VIII alpha 2 chain	protein-coding
1295	COL8A1	C3orf7	MIM:120251|HGNC:HGNC:2215|Ensembl:ENSG00000144810|Vega:OTTHUMG00000148669	3q12.1	collagen type VIII alpha 1 chain	protein-coding
128209	KLF17	ZNF393|Zfp393	MIM:609602|HGNC:HGNC:18830|Ensembl:ENSG00000171872|Vega:OTTHUMG00000009664	1p34.1	Kruppel like factor 17	protein-coding
1272	CNTN1	F3|GP135|MYPCN	MIM:600016|HGNC:HGNC:2171|Ensembl:ENSG00000018236|Vega:OTTHUMG00000169362	12q12	contactin 1	protein-coding
124540	MSI2	MSI2H	MIM:607897|HGNC:HGNC:18585|Ensembl:ENSG00000153944|Vega:OTTHUMG00000178398	17q22	musashi RNA binding protein 2	protein-coding
1235	CCR6	BN-1|C-C CKR-6|CC-CKR-6|CCR-6|CD196|CKR-L3|CKRL3|CMKBR6|DCR2|DRY6|GPR29|GPRCY4|STRL22	MIM:601835|HGNC:HGNC:1607|Ensembl:ENSG00000112486|Vega:OTTHUMG00000016015	6q27	C-C motif chemokine receptor 6	protein-coding
1234	CCR5	CC-CKR-5|CCCKR5|CCR-5|CD195|CKR-5|CKR5|CMKBR5|IDDM22	MIM:601373|HGNC:HGNC:1606|Ensembl:ENSG00000160791|Vega:OTTHUMG00000133481	3p21.31	C-C motif chemokine receptor 5 (gene/pseudogene)	protein-coding
1196	CLK2	-	MIM:602989|HGNC:HGNC:2069|Ensembl:ENSG00000176444|Vega:OTTHUMG00000035873	1q22	CDC like kinase 2	protein-coding
116844	LRG1	HMFT1766|LRG	MIM:611289|HGNC:HGNC:29480|Ensembl:ENSG00000171236|Vega:OTTHUMG00000182010	19p13.3	leucine rich alpha-2-glycoprotein 1	protein-coding
1164	CKS2	CKSHS2	MIM:116901|HGNC:HGNC:2000|Ensembl:ENSG00000123975|Vega:OTTHUMG00000020180	9q22.2	CDC28 protein kinase regulatory subunit 2	protein-coding
116071	BATF2	SARI	MIM:614983|HGNC:HGNC:25163|Ensembl:ENSG00000168062|Vega:OTTHUMG00000165633	11q13.1	basic leucine zipper ATF-like transcription factor 2	protein-coding
115908	CTHRC1	-	MIM:610635|HGNC:HGNC:18831|Ensembl:ENSG00000164932|Vega:OTTHUMG00000164887	8q22.3	collagen triple helix repeat containing 1	protein-coding
1153	CIRBP	CIRP	MIM:602649|HGNC:HGNC:1982|Ensembl:ENSG00000099622|Vega:OTTHUMG00000180145	19p13.3	cold inducible RNA binding protein	protein-coding
11343	MGLL	HU-K5|HUK5|MAGL|MGL	MIM:609699|HGNC:HGNC:17038|Ensembl:ENSG00000074416|Vega:OTTHUMG00000159641	3q21.3	monoglyceride lipase	protein-coding
11326	VSIG4	CRIg|Z39IG	MIM:300353|HGNC:HGNC:17032|Ensembl:ENSG00000155659|Vega:OTTHUMG00000021727	Xq12	V-set and immunoglobulin domain containing 4	protein-coding
112399	EGLN3	HIFP4H3|HIFPH3|PHD3	MIM:606426|HGNC:HGNC:14661|Ensembl:ENSG00000129521|Vega:OTTHUMG00000029498	14q13.1	egl-9 family hypoxia inducible factor 3	protein-coding
11187	PKP3	-	MIM:605561|HGNC:HGNC:9025|Ensembl:ENSG00000184363|Vega:OTTHUMG00000119068	11p15.5	plakophilin 3	protein-coding
11186	RASSF1	123F2|NORE2A|RASSF1A|RDA32|REH3P21	MIM:605082|HGNC:HGNC:9882|Ensembl:ENSG00000068028|Vega:OTTHUMG00000149958	3p21.31	Ras association domain family member 1	protein-coding
11167	FSTL1	FRP|FSL1|MIR198|OCC-1|OCC1|tsc36	MIM:605547|HGNC:HGNC:3972|Ensembl:ENSG00000163430|Vega:OTTHUMG00000159440	3q13.33	follistatin like 1	protein-coding
11156	PTP4A3	PRL-3|PRL-R|PRL3	MIM:606449|HGNC:HGNC:9636|Ensembl:ENSG00000184489|Vega:OTTHUMG00000164490	8q24.3	protein tyrosine phosphatase type IVA, member 3	protein-coding
11149	BVES	HBVES|LGMD2X|POP1|POPDC1	MIM:604577|HGNC:HGNC:1152|Ensembl:ENSG00000112276|Vega:OTTHUMG00000015291	6q21	blood vessel epicardial substance	protein-coding
1112	FOXN3	C14orf116|CHES1|PRO1635	MIM:602628|HGNC:HGNC:1928|Ensembl:ENSG00000053254|Vega:OTTHUMG00000170898	14q31.3-q32.11	forkhead box N3	protein-coding
11040	PIM2	-	MIM:300295|HGNC:HGNC:8987|Ensembl:ENSG00000102096|Vega:OTTHUMG00000024132	Xp11.23	Pim-2 proto-oncogene, serine/threonine kinase	protein-coding
10938	EHD1	H-PAST|HPAST1|PAST|PAST1	MIM:605888|HGNC:HGNC:3242|Ensembl:ENSG00000110047|Vega:OTTHUMG00000066832	11q13.1	EH domain containing 1	protein-coding
10891	PPARGC1A	LEM6|PGC-1(alpha)|PGC-1alpha|PGC-1v|PGC1|PGC1A|PPARGC1	MIM:604517|HGNC:HGNC:9237|Ensembl:ENSG00000109819|Vega:OTTHUMG00000097747	4p15.2	PPARG coactivator 1 alpha	protein-coding
10857	PGRMC1	HPR6.6|MPR	MIM:300435|HGNC:HGNC:16090|Ensembl:ENSG00000101856|Vega:OTTHUMG00000022268	Xq24	progesterone receptor membrane component 1	protein-coding
10855	HPSE	HPA|HPA1|HPR1|HPSE1|HSE1	MIM:604724|HGNC:HGNC:5164|Ensembl:ENSG00000173083|Vega:OTTHUMG00000130425	4q21.23	heparanase	protein-coding
10803	CCR9	CC-CKR-9|CDw199|GPR-9-6|GPR28	MIM:604738|HGNC:HGNC:1610|Ensembl:ENSG00000173585|Vega:OTTHUMG00000133450	3p21.31	C-C motif chemokine receptor 9	protein-coding
10797	MTHFD2	NMDMC	MIM:604887|HGNC:HGNC:7434|Ensembl:ENSG00000065911|Vega:OTTHUMG00000129814	2p13.1	methylenetetrahydrofolate dehydrogenase (NADP+ dependent) 2, methenyltetrahydrofolate cyclohydrolase	protein-coding
10765	KDM5B	CT31|JARID1B|PLU-1|PLU1|PPP1R98|PUT1|RBBP2H1A|RBP2-H1	MIM:605393|HGNC:HGNC:18039|Ensembl:ENSG00000117139|Vega:OTTHUMG00000041401	1q32.1	lysine demethylase 5B	protein-coding
10672	GNA13	G13	MIM:604406|HGNC:HGNC:4381|Ensembl:ENSG00000120063|Vega:OTTHUMG00000179316	17q24.1	G protein subunit alpha 13	protein-coding
10637	LEFTY1	LEFTB|LEFTYB	MIM:603037|HGNC:HGNC:6552|Ensembl:ENSG00000243709|Vega:OTTHUMG00000037443	1q42.12	left-right determination factor 1	protein-coding
10630	PDPN	AGGRUS|GP36|GP40|Gp38|HT1A-1|OTS8|PA2.26|T1A|T1A-2|T1A2|TI1A	MIM:608863|HGNC:HGNC:29602|Ensembl:ENSG00000162493|Vega:OTTHUMG00000007912	1p36.21	podoplanin	protein-coding
10563	CXCL13	ANGIE|ANGIE2|BCA-1|BCA1|BLC|BLR1L|SCYB13	MIM:605149|HGNC:HGNC:10639|Ensembl:ENSG00000156234|Vega:OTTHUMG00000130201	4q21.1	C-X-C motif chemokine ligand 13	protein-coding
10516	FBLN5	ADCL2|ARCL1A|ARMD3|DANCE|EVEC|FIBL-5|HNARMD|UP50	MIM:604580|HGNC:HGNC:3602|Ensembl:ENSG00000140092|Vega:OTTHUMG00000171122	14q32.12	fibulin 5	protein-coding
1048	CEACAM5	CD66e|CEA	MIM:114890|HGNC:HGNC:1817|Ensembl:ENSG00000105388|Vega:OTTHUMG00000151061	19q13.2	carcinoembryonic antigen related cell adhesion molecule 5	protein-coding
10468	FST	FS	MIM:136470|HGNC:HGNC:3971|Ensembl:ENSG00000134363|Vega:OTTHUMG00000131183	5q11.2	follistatin	protein-coding
10459	MAD2L2	FANCV|MAD2B|POLZ2|REV7	MIM:604094|HGNC:HGNC:6764|Ensembl:ENSG00000116670|Vega:OTTHUMG00000002231	1p36.22	mitotic arrest deficient 2 like 2	protein-coding
10454	TAB1	3'-Tab1|MAP3K7IP1	MIM:602615|HGNC:HGNC:18157|Ensembl:ENSG00000100324|Vega:OTTHUMG00000151102	22q13.1	TGF-beta activated kinase 1 (MAP3K7) binding protein 1	protein-coding
10399	RACK1	GNB2L1|Gnb2-rs1|H12.3|HLC-7|PIG21	MIM:176981|HGNC:HGNC:4399|Ensembl:ENSG00000204628|Vega:OTTHUMG00000163380	5q35.3	receptor for activated C kinase 1	protein-coding
10298	PAK4	-	MIM:605451|HGNC:HGNC:16059|Ensembl:ENSG00000130669|Vega:OTTHUMG00000182800	19q13.2	p21 (RAC1) activated kinase 4	protein-coding
1026	CDKN1A	CAP20|CDKN1|CIP1|MDA-6|P21|SDI1|WAF1|p21CIP1	MIM:116899|HGNC:HGNC:1784|Ensembl:ENSG00000124762|Vega:OTTHUMG00000014603	6p21.2	cyclin dependent kinase inhibitor 1A	protein-coding
10252	SPRY1	hSPRY1	MIM:602465|HGNC:HGNC:11269|Ensembl:ENSG00000164056|Vega:OTTHUMG00000133071	4q28.1	sprouty RTK signaling antagonist 1	protein-coding
10232	MSLN	MPF|SMRP	MIM:601051|HGNC:HGNC:7371|Ensembl:ENSG00000102854|Vega:OTTHUMG00000047992	16p13.3	mesothelin	protein-coding
10197	PSME3	HEL-S-283|Ki|PA28-gamma|PA28G|PA28gamma|REG-GAMMA	MIM:605129|HGNC:HGNC:9570|Ensembl:ENSG00000131467|Vega:OTTHUMG00000180654	17q21.31	proteasome activator subunit 3	protein-coding
1018	CDK3	-	MIM:123828|HGNC:HGNC:1772|Ensembl:ENSG00000250506|Vega:OTTHUMG00000154861	17q25.1	cyclin dependent kinase 3	protein-coding
10146	G3BP1	G3BP|HDH-VIII	MIM:608431|HGNC:HGNC:30292|Ensembl:ENSG00000145907|Vega:OTTHUMG00000130123	5q33.1	G3BP stress granule assembly factor 1	protein-coding
10131	TRAP1	HSP 75|HSP75|HSP90L|TRAP-1	MIM:606219|HGNC:HGNC:16264|Ensembl:ENSG00000126602|Vega:OTTHUMG00000129427	16p13.3	TNF receptor associated protein 1	protein-coding
1012	CDH13	CDHH|P105	MIM:601364|HGNC:HGNC:1753|Ensembl:ENSG00000140945|Vega:OTTHUMG00000176635	16q23.3	cadherin 13	protein-coding
1009	CDH11	CAD11|CDHOB|OB|OSF-4	MIM:600023|HGNC:HGNC:1750|Ensembl:ENSG00000140937|Vega:OTTHUMG00000137494	16q21	cadherin 11	protein-coding
10062	NR1H3	LXR-a|LXRA|RLD-1	MIM:602423|HGNC:HGNC:7966|Ensembl:ENSG00000025434|Vega:OTTHUMG00000150628	11p11.2	nuclear receptor subfamily 1 group H member 3	protein-coding
100507436	MICA	MIC-A|PERB11.1	MIM:600169|HGNC:HGNC:7090|Ensembl:ENSG00000204520|IMGT/GENE-DB:MICA|Vega:OTTHUMG00000031073	6p21.33	MHC class I polypeptide-related sequence A	protein-coding
100506658	OCLN	BLCPMG|PPP1R115|PTORCH1	MIM:602876|HGNC:HGNC:8104|Ensembl:ENSG00000197822|Vega:OTTHUMG00000099356	5q13.2	occludin	protein-coding
10049	DNAJB6	DJ4|DnaJ|HHDJ1|HSJ-2|HSJ2|LGMD1D|LGMD1E|MRJ|MSJ-1	MIM:611332|HGNC:HGNC:14888|Ensembl:ENSG00000105993|Vega:OTTHUMG00000157242	7q36.3	DnaJ heat shock protein family (Hsp40) member B6	protein-coding
1003	CDH5	7B4|CD144	MIM:601120|HGNC:HGNC:1764|Ensembl:ENSG00000179776|Vega:OTTHUMG00000137495	16q21	cadherin 5	protein-coding
10023	FRAT1	-	MIM:602503|HGNC:HGNC:3944|Ensembl:ENSG00000165879|Vega:OTTHUMG00000018848	10q24.1	FRAT1, WNT signaling pathway regulator	protein-coding
10015	PDCD6IP	AIP1|ALIX|DRIP4|HP95	MIM:608074|HGNC:HGNC:8766|Ensembl:ENSG00000170248|Vega:OTTHUMG00000130751	3p22.3	programmed cell death 6 interacting protein	protein-coding
10014	HDAC5	HD5|NY-CO-9	MIM:605315|HGNC:HGNC:14068|Ensembl:ENSG00000108840|Vega:OTTHUMG00000181806	17q21.31	histone deacetylase 5	protein-coding
406985	MIR200C	MIRN200C|mir-200c	MIM:612092|HGNC:HGNC:31580|Ensembl:ENSG00000207713|miRBase:MI0000650	12p13.31	microRNA 200c	ncRNA
406984	MIR200B	MIRN200B|mir-200b	MIM:612091|HGNC:HGNC:31579|Ensembl:ENSG00000207730|miRBase:MI0000342	1p36.33	microRNA 200b	ncRNA
406983	MIR200A	MIRN200A|mir-200a	MIM:612090|HGNC:HGNC:31578|Ensembl:ENSG00000207607|miRBase:MI0000737	1p36.33	microRNA 200a	ncRNA
406991	MIR21	MIRN21|hsa-mir-21|miR-21|miRNA21	MIM:611020|HGNC:HGNC:31586|Ensembl:ENSG00000284190|miRBase:MI0000077	17q23.1	microRNA 21	ncRNA
407040	MIR34A	MIRN34A|miRNA34A|mir-34|mir-34a	MIM:611172|HGNC:HGNC:31635|Ensembl:ENSG00000284357|miRBase:MI0000268	1p36.22|1p36.22	microRNA 34a	ncRNA
407029	MIR30A	MIRN30A|mir-30a	MIM:612329|HGNC:HGNC:31624|Ensembl:ENSG00000207827|miRBase:MI0000088	6q13	microRNA 30a	ncRNA
406988	MIR205	MIRN205|mir-205	MIM:613147|HGNC:HGNC:31583|Ensembl:ENSG00000284485|miRBase:MI0000285	1q32.2	microRNA 205	ncRNA
378938	MALAT1	HCN|LINC00047|NCRNA00047|NEAT2|PRO2853	MIM:607924|HGNC:HGNC:29665	11q13.1	metastasis associated lung adenocarcinoma transcript 1 (non-protein coding)	ncRNA
407006	MIR221	MIRN221|miRNA221|mir-221	MIM:300568|HGNC:HGNC:31601|Ensembl:ENSG00000207870|miRBase:MI0000298	Xp11.3	microRNA 221	ncRNA
406937	MIR145	MIRN145|miR-145|miRNA145	MIM:611795|HGNC:HGNC:31532|Ensembl:ENSG00000276365|miRBase:MI0000461	5q32	microRNA 145	ncRNA
100124700	HOTAIR	HOXAS|HOXC-AS4|HOXC11-AS1|NCRNA00072	MIM:611400|HGNC:HGNC:33510|Ensembl:ENSG00000228630	12q13.13	HOX transcript antisense RNA	ncRNA
283120	H19	ASM|ASM1|BWS|D11S813E|LINC00008|NCRNA00008|WT2	MIM:103280|HGNC:HGNC:4713|Ensembl:ENSG00000130600	11p15.5	H19, imprinted maternally expressed transcript (non-protein coding)	ncRNA
554210	MIR429	MIRN429|hsa-mir-429|mir-429	MIM:612094|HGNC:HGNC:13784|Ensembl:ENSG00000198976|miRBase:MI0001641	1p36.33	microRNA 429	ncRNA
407050	MIR93	MIRN9|MIRN93|hsa-mir-93|miR-93	MIM:612984|HGNC:HGNC:31645|Ensembl:ENSG00000207757|miRBase:MI0000095	7q22.1	microRNA 93	ncRNA
406987	MIR204	MIRN204|RDICC|miRNA204|mir-204	MIM:610942|HGNC:HGNC:31582|Ensembl:ENSG00000207935|miRBase:MI0000284	9q21.12	microRNA 204	ncRNA
406986	MIR203A	MIR203|MIRN203|hsa-mir-203a|miR-203|miRNA203|mir-203a	MIM:611899|HGNC:HGNC:31581|Ensembl:ENSG00000207568|miRBase:MI0000283	14q32.33	microRNA 203a	ncRNA
406962	MIR186	MIRN186|miR-186	HGNC:HGNC:31557|Ensembl:ENSG00000207721|miRBase:MI0000483	1p31.1	microRNA 186	ncRNA
406947	MIR155	MIRN155|miRNA155|mir-155	MIM:609337|HGNC:HGNC:31542|Ensembl:ENSG00000283904|miRBase:MI0000681	21q21.3	microRNA 155	ncRNA
406940	MIR148A	MIRN148|MIRN148A|hsa-mir-148|mir-148a	MIM:613786|HGNC:HGNC:31535|Ensembl:ENSG00000199085|miRBase:MI0000253	7p15.2	microRNA 148a	ncRNA
652995	UCA1	CUDR|LINC00178|NCRNA00178|UCAT1|onco-lncRNA-36	MIM:617500|HGNC:HGNC:37126|Ensembl:ENSG00000214049	19p13.12	urothelial cancer associated 1 (non-protein coding)	ncRNA
407017	MIR26B	MIRN26B|hsa-mir-26b|miR-26b	MIM:612152|HGNC:HGNC:31612|Ensembl:ENSG00000199121|miRBase:MI0000084	2q35	microRNA 26b	ncRNA
407010	MIR23A	MIRN23A|hsa-mir-23a|miRNA23A|mir-23a	MIM:607962|HGNC:HGNC:31605|Ensembl:ENSG00000207980|miRBase:MI0000079	19p13.12	microRNA 23a	ncRNA
406996	MIR214	MIRN214|miRNA214|mir-214	MIM:610721|HGNC:HGNC:31591|Ensembl:ENSG00000283844|miRBase:MI0000290	1q24.3	microRNA 214	ncRNA
406979	MIR19A	C13orf25|MIR17HG|MIRH1|MIRHG1|MIRN19A|hsa-mir-19a|miR-19a|miRNA19A	MIM:609418|HGNC:HGNC:31574|Ensembl:ENSG00000284204|miRBase:MI0000073	13q31.3	microRNA 19a	ncRNA
406942	MIR150	MIRN150|miRNA150|mir-150	MIM:611114|HGNC:HGNC:31537|Ensembl:ENSG00000207782|miRBase:MI0000479	19q13.33	microRNA 150	ncRNA
406933	MIR141	MIRN141|mir-141	MIM:612093|HGNC:HGNC:31528|Ensembl:ENSG00000207708|miRBase:MI0000457	12p13.31	microRNA 141	ncRNA
406907	MIR124-1	MIR124A|MIR124A1|MIRN124-1|MIRN124A1|mir-124-1	MIM:609327|HGNC:HGNC:31502|Ensembl:ENSG00000284321|miRBase:MI0000443	8p23.1	microRNA 124-1	ncRNA
406893	MIR101-1	MIRN101-1|mir-101-1	MIM:612511|HGNC:HGNC:31488|Ensembl:ENSG00000199135|miRBase:MI0000103	1p31.3	microRNA 101-1	ncRNA
100885779	LINC-ROR	ROR|lincRNA-RoR	MIM:615173|HGNC:HGNC:43773|Ensembl:ENSG00000258609	18q21.31	long intergenic non-protein coding RNA, regulator of reprogramming	ncRNA
100126297	MIR300	MIRN300|hsa-mir-300	HGNC:HGNC:33636|Ensembl:ENSG00000215957|miRBase:MI0005525	14q32.31	microRNA 300	ncRNA
407046	MIR9-1	MIRN9-1|hsa-mir-9-1|miRNA9-1|mir-9-1	MIM:611186|HGNC:HGNC:31641|Ensembl:ENSG00000207933|miRBase:MI0000466	1q22	microRNA 9-1	ncRNA
407032	MIR30C2	MIRN30C2|mir-30c-2	HGNC:HGNC:31627|Ensembl:ENSG00000199094|miRBase:MI0000254	6q13	microRNA 30c-2	ncRNA
407031	MIR30C1	MIRN30C1|mir-30c-1	MIM:615151|HGNC:HGNC:31626|Ensembl:ENSG00000207962|miRBase:MI0000736	1p34.2	microRNA 30c-1	ncRNA
407026	MIR29C	MIRN29C|miRNA29C|mir-29c	MIM:610784|HGNC:HGNC:31621|Ensembl:ENSG00000284214|miRBase:MI0000735	1q32.2	microRNA 29c	ncRNA
407024	MIR29B1	MIRN29B1|miR-29b|miRNA29B1|mir-29b-1	MIM:610783|HGNC:HGNC:31619|Ensembl:ENSG00000283797|miRBase:MI0000105	7q32.3	microRNA 29b-1	ncRNA
407015	MIR26A1	MIR26A|MIRN26A1|mir-26a-1	MIM:612151|HGNC:HGNC:31610|Ensembl:ENSG00000199075|miRBase:MI0000083	3p22.2	microRNA 26a-1	ncRNA
406928	MIR137	MIRN137|miR-137	MIM:614304|HGNC:HGNC:31523|Ensembl:ENSG00000284202|miRBase:MI0000454	1p21.3	microRNA 137	ncRNA
406920	MIR130B	MIRN130B|mir-130b	MIM:613682|HGNC:HGNC:31515|Ensembl:ENSG00000283871|miRBase:MI0000748	22q11.21	microRNA 130b	ncRNA
406903	MIR10B	MIRN10B|hsa-mir-10b|miRNA10B|mir-10b	MIM:611576|HGNC:HGNC:31498|Ensembl:ENSG00000207744|miRBase:MI0000267	2q31.1	microRNA 10b	ncRNA
406900	MIR106B	MIRN106B|mir-106b	MIM:612983|HGNC:HGNC:31495|Ensembl:ENSG00000208036|miRBase:MI0000734	7q22.1	microRNA 106b	ncRNA
406899	MIR106A	MIRN106A|mir-106|mir-106a	MIM:300792|HGNC:HGNC:31494|Ensembl:ENSG00000284157|miRBase:MI0000113	Xq26.2	microRNA 106a	ncRNA
406881	MIRLET7A1	LET7A1|MIRNLET7A1|let-7a-1	MIM:605386|HGNC:HGNC:31476|Ensembl:ENSG00000199165|miRBase:MI0000060	9q22.32	microRNA let-7a-1	ncRNA
112597	CYTOR	C2orf59|LINC00152|NCRNA00152	HGNC:HGNC:28717|Ensembl:ENSG00000222041	2p11.2	cytoskeleton regulator RNA	ncRNA
724025	MIR655	MIRN655|hsa-mir-655|mir-655	HGNC:HGNC:32911|Ensembl:ENSG00000207646|miRBase:MI0003677	14q32.31	microRNA 655	ncRNA
693215	MIR630	MIRN630|hsa-mir-630	HGNC:HGNC:32886|Ensembl:ENSG00000283798|miRBase:MI0003644	15q24.1	microRNA 630	ncRNA
693175	MIR590	MIRN590|hsa-mir-590|mir-590	MIM:615070|HGNC:HGNC:32846|Ensembl:ENSG00000207741|miRBase:MI0003602	7q11.23	microRNA 590	ncRNA
574444	MIR491	MIRN491|hsa-mir-491|mir-491	HGNC:HGNC:32076|Ensembl:ENSG00000207609|miRBase:MI0003126	9p21.3	microRNA 491	ncRNA
574436	MIR485	MIRN485|hsa-mir-485|mir-485	MIM:615385|HGNC:HGNC:32067|Ensembl:ENSG00000208027|miRBase:MI0002469	14q32.31	microRNA 485	ncRNA
55384	MEG3	FP504|GTL2|LINC00023|NCRNA00023|PRO0518|PRO2160|onco-lncRNA-83|prebp1	MIM:605636|HGNC:HGNC:14575|Ensembl:ENSG00000214548	14q32.2	maternally expressed 3 (non-protein coding)	ncRNA
55000	TUG1	LINC00080|NCRNA00080|TI-227H	MIM:614971|HGNC:HGNC:26066	22q12.2	taurine up-regulated 1 (non-protein coding)	ncRNA
494324	MIR375	MIRN375|hsa-mir-375|miRNA375|mir-375	MIM:611173|HGNC:HGNC:31868|Ensembl:ENSG00000198973|miRBase:MI0000783	2q35	microRNA 375	ncRNA
494323	MIR361	MIRN361|hsa-mir-361|mir-361	HGNC:HGNC:31867|Ensembl:ENSG00000199051|miRBase:MI0000760	Xq21.2	microRNA 361	ncRNA
407053	MIR96	DFNA50|MIRN96|hsa-mir-96|miR-96|miRNA96	MIM:611606|HGNC:HGNC:31648|Ensembl:ENSG00000199158|miRBase:MI0000098	7q32.2	microRNA 96	ncRNA
407035	MIR31	MIRN31|hsa-mir-31|miR-31	MIM:612155|HGNC:HGNC:31630|Ensembl:ENSG00000199177|miRBase:MI0000089	9p21.3	microRNA 31	ncRNA
407007	MIR222	MIRN222|miRNA222|mir-222	MIM:300569|HGNC:HGNC:31602|Ensembl:ENSG00000207725|miRBase:MI0000299	Xp11.3	microRNA 222	ncRNA
407000	MIR218-1	MIRN218-1|mir-218-1	MIM:616770|HGNC:HGNC:31595|Ensembl:ENSG00000207732|miRBase:MI0000294	4p15.31	microRNA 218-1	ncRNA
406995	MIR181A1	MIR213|MIRN181A1|MIRN213|hsa-mir-181a-1|mir-181a-1|mir-213	MIM:612742|HGNC:HGNC:31590|Ensembl:ENSG00000207759|miRBase:MI0000289	1q32.1	microRNA 181a-1	ncRNA
406969	MIR194-1	MIRN194-1|mir-194-1	MIM:610940|HGNC:HGNC:31564|Ensembl:ENSG00000207624|miRBase:MI0000488	1q41	microRNA 194-1	ncRNA
406961	MIR185	MIRN185|miR-185	MIM:615576|HGNC:HGNC:31556|Ensembl:ENSG00000208023|miRBase:MI0000482	22q11.21	microRNA 185	ncRNA
406958	MIR182	MIRN182|miRNA182|mir-182	MIM:611607|HGNC:HGNC:31553|Ensembl:ENSG00000207990|miRBase:MI0000272	7q32.2	microRNA 182	ncRNA
406954	MIR181A2	MIRN181A|MIRN181A2|hsa-mir-181a-2|mir-181a-2	MIM:612743|HGNC:HGNC:31549|Ensembl:ENSG00000207595|miRBase:MI0000269	9q33.3	microRNA 181a-2	ncRNA
406952	MIR17	MIR17-5p|MIR91|MIRN17|MIRN91|hsa-mir-17|miR-17|miR17-3p|miRNA17|miRNA91	MIM:609416|HGNC:HGNC:31547|Ensembl:ENSG00000284536|miRBase:MI0000071	13q31.3	microRNA 17	ncRNA
406935	MIR143	MIRN143|mir-143	MIM:612117|HGNC:HGNC:31530|Ensembl:ENSG00000284182|miRBase:MI0000459	5q32	microRNA 143	ncRNA
406919	MIR130A	MIRN130A|miRNA130A|mir-130a	MIM:610175|HGNC:HGNC:31514|Ensembl:ENSG00000208009|miRBase:MI0000448	11q12.1	microRNA 130a	ncRNA
406915	MIR128-1	MIR128A|MIRN128-1|MIRN128A|mir-128-1	MIM:611774|HGNC:HGNC:31510|Ensembl:ENSG00000207654|miRBase:MI0000447	2q21.3	microRNA 128-1	ncRNA
406902	MIR10A	MIRN10A|hsa-mir-10a|miRNA10A|mir-10a	MIM:610173|HGNC:HGNC:31497|Ensembl:ENSG00000284038|miRBase:MI0000266	17q21.32	microRNA 10a	ncRNA
283131	NEAT1	LINC00084|NCRNA00084|TncRNA|VINC	MIM:612769|HGNC:HGNC:30815|Ensembl:ENSG00000245532	11q13.1	nuclear paraspeckle assembly transcript 1 (non-protein coding)	ncRNA
100302203	MIR1271	MIRN1271|hsa-mir-1271	HGNC:HGNC:35252|Ensembl:ENSG00000221464|miRBase:MI0003814	5q35.2	microRNA 1271	ncRNA
693201	MIR616	MIRN616|hsa-mir-616	MIM:614489|HGNC:HGNC:32872|Ensembl:ENSG00000208028|miRBase:MI0003629	12q13.3	microRNA 616	ncRNA
693197	MIR612	MIRN612|hsa-mir-612	HGNC:HGNC:32868|Ensembl:ENSG00000283791|miRBase:MI0003625	11q13.1	microRNA 612	ncRNA
574511	MIR506	MIRN506|hsa-mir-506|mir-506	MIM:300877|HGNC:HGNC:32143|Ensembl:ENSG00000207731|miRBase:MI0003193	Xq27.3	microRNA 506	ncRNA
574456	MIR497	MIRN497|hsa-mir-497|mir-497	MIM:615672|HGNC:HGNC:32088|Ensembl:ENSG00000284027|miRBase:MI0003138	17p13.1	microRNA 497	ncRNA
574452	MIR494	MIRN494|hsa-mir-494|mir-494	MIM:616036|HGNC:HGNC:32084|Ensembl:ENSG00000194717|miRBase:MI0003134	14q32.31	microRNA 494	ncRNA
574442	MIR489	MIRN489|hsa-mir-489|mir-489	MIM:614523|HGNC:HGNC:32074|Ensembl:ENSG00000207656|miRBase:MI0003124	7q21.3	microRNA 489	ncRNA
442920	MIR196B	MIRN196B|miR-196b|miRNA196B	MIM:609688|HGNC:HGNC:31790|Ensembl:ENSG00000283745|miRBase:MI0001150	7p15.2	microRNA 196b	ncRNA
442918	MIR373	MIRN373|hsa-mir-373|miRNA373|mir-373	MIM:611954|HGNC:HGNC:31787|Ensembl:ENSG00000199143|miRBase:MI0000781	19q13.42	microRNA 373	ncRNA
442891	MIR135B	MIRN135B|mir-135b	HGNC:HGNC:31760|Ensembl:ENSG00000199059|miRBase:MI0000810	1q32.1	microRNA 135b	ncRNA
441951	ZFAS1	C20orf199|HSUP1|HSUP2|NCRNA00275|ZNFX1-AS1	HGNC:HGNC:33101|Ensembl:ENSG00000177410	20q13.13	ZNFX1 antisense RNA 1	ncRNA
407042	MIR34C	MIRN34C|miRNA34C|mir-34c	MIM:611375|HGNC:HGNC:31637|Ensembl:ENSG00000207562|miRBase:MI0000743	11q23.1	microRNA 34c	ncRNA
407039	MIR33A	MIR33|MIRN33|MIRN33A|hsa-mir-33|hsa-mir-33a|miR-33|miRNA33A|mir-33a	MIM:612156|HGNC:HGNC:31634|Ensembl:ENSG00000207932|miRBase:MI0000091	22q13.2	microRNA 33a	ncRNA
407033	MIR30D	MIRN30D|mir-30d	HGNC:HGNC:31628|Ensembl:ENSG00000199153|miRBase:MI0000255	8q24.22	microRNA 30d	ncRNA
407027	MIR301A	MIR301|MIRN301|MIRN301A|mir-301a	MIM:615675|HGNC:HGNC:31622|Ensembl:ENSG00000207996|miRBase:MI0000745	17q22	microRNA 301a	ncRNA
407018	MIR27A	MIR27|MIRN27A|mir-27a	MIM:612153|HGNC:HGNC:31613|Ensembl:ENSG00000207808|miRBase:MI0000085	19p13.12	microRNA 27a	ncRNA
407012	MIR24-1	MIR189|MIRN24-1|miR-24-1|miRNA24-1	MIM:609705|HGNC:HGNC:31607|Ensembl:ENSG00000284459|miRBase:MI0000080	9q22.32	microRNA 24-1	ncRNA
407009	MIR224	MIRN224|miRNA224	MIM:300769|HGNC:HGNC:31604|Ensembl:ENSG00000284363|miRBase:MI0000301	Xq28	microRNA 224	ncRNA
407008	MIR223	MIRN223|miRNA223|mir-223	MIM:300694|HGNC:HGNC:31603|Ensembl:ENSG00000284567|miRBase:MI0000300	Xq12	microRNA 223	ncRNA
407001	MIR218-2	MIRN218-2|mir-218-2	MIM:616771|HGNC:HGNC:31596|Ensembl:ENSG00000207739|miRBase:MI0000295	5q34	microRNA 218-2	ncRNA
406989	MIR206	MIRN206|miRNA206|mir-206	MIM:611599|HGNC:HGNC:31584|Ensembl:ENSG00000207604|miRBase:MI0000490	6p12.2	microRNA 206	ncRNA
406982	MIR20A	C13orf25|MIR17HG|MIR20|MIRH1|MIRHG1|MIRN20|MIRN20A|hsa-mir-20|hsa-mir-20a|miR-20|miRNA20A|mir-20a	MIM:609420|HGNC:HGNC:31577|Ensembl:ENSG00000283762|miRBase:MI0000076	13q31.3	microRNA 20a	ncRNA
406976	MIR199A1	MIR-199-s|MIRN199A1|mir-199a-1	MIM:610719|HGNC:HGNC:31571|Ensembl:ENSG00000207752|miRBase:MI0000242	19p13.2	microRNA 199a-1	ncRNA
406968	MIR193A	MIRN193|MIRN193A|mir-193a	MIM:614733|HGNC:HGNC:31563|Ensembl:ENSG00000207614|miRBase:MI0000487	17q11.2	microRNA 193a	ncRNA
406966	MIR191	MIRN191|miR-191	MIM:615150|HGNC:HGNC:31561|Ensembl:ENSG00000207605|miRBase:MI0000465	3p21.31	microRNA 191	ncRNA
406963	MIR187	MIRN187|miR-187|miRNA187	MIM:612698|HGNC:HGNC:31558|Ensembl:ENSG00000207797|miRBase:MI0000274	18q12.2	microRNA 187	ncRNA
406959	MIR183	MIRN183|miR-183|miRNA183	MIM:611608|HGNC:HGNC:31554|Ensembl:ENSG00000207691|miRBase:MI0000273	7q32.2	microRNA 183	ncRNA
406950	MIR16-1	MIRN16-1|miRNA16-1|mir-16-1	MIM:609704|HGNC:HGNC:31545|Ensembl:ENSG00000208006|miRBase:MI0000070	13q14.2	microRNA 16-1	ncRNA
406949	MIR15B	MIRN15B|hsa-mir-15b|miR-15b	HGNC:HGNC:31544|Ensembl:ENSG00000207779|miRBase:MI0000438	3q25.33	microRNA 15b	ncRNA
406948	MIR15A	MIRN15A|hsa-mir-15a|miRNA15A|mir-15a	MIM:609703|HGNC:HGNC:31543|Ensembl:ENSG00000283785|miRBase:MI0000069	13q14.2	microRNA 15a	ncRNA
406944	MIR153-1	MIRN153-1|mir-153-1	HGNC:HGNC:31539|Ensembl:ENSG00000207647|miRBase:MI0000463	2q35	microRNA 153-1	ncRNA
406938	MIR146A	MIRN146|MIRN146A|miR-146a|miRNA146A	MIM:610566|HGNC:HGNC:31533|Ensembl:ENSG00000283733|miRBase:MI0000477	5q33.3	microRNA 146a	ncRNA
406925	MIR135A1	MIRN135-1|MIRN135A1|mir-135a-1	HGNC:HGNC:31520|Ensembl:ENSG00000207926|miRBase:MI0000452	3p21.2	microRNA 135a-1	ncRNA
406924	MIR134	MIRN134|mir-134	MIM:610164|HGNC:HGNC:31519|Ensembl:ENSG00000207993|miRBase:MI0000474	14q32.31	microRNA 134	ncRNA
406921	MIR132	MIRN132|miRNA132|mir-132	MIM:610016|HGNC:HGNC:31516|Ensembl:ENSG00000267200|miRBase:MI0000449	17p13.3	microRNA 132	ncRNA
406909	MIR124-3	MIRN124-3|MIRN124A3|mir-124-3	HGNC:HGNC:31504|Ensembl:ENSG00000207598|miRBase:MI0000445	20q13.33	microRNA 124-3	ncRNA
406908	MIR124-2	MIRN124-2|MIRN124A2|mir-124-2	HGNC:HGNC:31503|Ensembl:ENSG00000207816|miRBase:MI0000444	8q12.3	microRNA 124-2	ncRNA
406906	MIR122	MIR122A|MIRN122|MIRN122A|hsa-mir-122|miRNA122|miRNA122A|mir-122	MIM:609582|HGNC:HGNC:31501|Ensembl:ENSG00000284440|miRBase:MI0000442	18q21.31	microRNA 122	ncRNA
406894	MIR101-2	MIRN101-2|mir-101-2	MIM:612512|HGNC:HGNC:31489|Ensembl:ENSG00000199065|miRBase:MI0000739	9p24.1	microRNA 101-2	ncRNA
406892	MIR100	MIRN100|miR-100	MIM:613186|HGNC:HGNC:31487|Ensembl:ENSG00000207994|miRBase:MI0000102	11q24.1	microRNA 100	ncRNA
29034	CPS1-IT1	CPS1-IT|CPS1IT|CPS1IT1|PRO0132	HGNC:HGNC:30102|Ensembl:ENSG00000280837	2q34	CPS1 intronic transcript 1	ncRNA
140828	LINC00261	ALIEN|C20orf56|DEANR1|HCCDR1|NCRNA00261|onco-lncRNA-17	HGNC:HGNC:16189|Ensembl:ENSG00000259974|Ensembl:ENSG00000283932	20p11.21	long intergenic non-protein coding RNA 261	ncRNA
101241892	NPTN-IT1	lncRNA-LET	MIM:615176|HGNC:HGNC:45091|Ensembl:ENSG00000281183	15q24.1	NPTN intronic transcript 1	ncRNA
100642175	SPRY4-IT1	SPRIGHTLY	HGNC:HGNC:42394|Ensembl:ENSG00000281881	5q31.3	SPRY4 intronic transcript 1	ncRNA
100303491	ZEB2-AS1	ZEB2-AS|ZEB2AS|ZEB2NAT	HGNC:HGNC:37149|Ensembl:ENSG00000238057	2q22.3	ZEB2 antisense RNA 1	ncRNA
100302242	MIR1236	MIRN1236|hsa-mir-1236	HGNC:HGNC:33925|Ensembl:ENSG00000284446|miRBase:MI0006326	6p21.33	microRNA 1236	ncRNA
100033819	MIR675	MIRN675|hsa-mir-675	MIM:615509|HGNC:HGNC:33351|Ensembl:ENSG00000284010|miRBase:MI0005416	11p15.5	microRNA 675	ncRNA
768219	MIR802	MIRN802|hsa-mir-802	MIM:616090|HGNC:HGNC:33140|Ensembl:ENSG00000211590|miRBase:MI0003906	21q22.12	microRNA 802	ncRNA
768216	MIR454	MIRN454|hsa-mir-454|mir-454	HGNC:HGNC:33137|Ensembl:ENSG00000211514|miRBase:MI0003820	17q22	microRNA 454	ncRNA
724033	MIR663A	MIR663|MIRN663|hsa-mir-663|hsa-mir-663a|mir-663a	HGNC:HGNC:32919|Ensembl:ENSG00000284419|miRBase:MI0003672	20p11.1	microRNA 663a	ncRNA
693235	MIR92B	MIRN92B|hsa-mir-92b|mir-92b	HGNC:HGNC:32920|Ensembl:ENSG00000284586|miRBase:MI0003560	1q22	microRNA 92b	ncRNA
693231	MIR646	MIRN646|hsa-mir-646	HGNC:HGNC:32902|Ensembl:ENSG00000207802|miRBase:MI0003661	20q13.33	microRNA 646	ncRNA
693224	MIR639	MIRN639|hsa-mir-639	HGNC:HGNC:32895|Ensembl:ENSG00000283822|miRBase:MI0003654	19p13.12	microRNA 639	ncRNA
693223	MIR638	MIRN638|hsa-mir-638	HGNC:HGNC:32894|Ensembl:ENSG00000207972|miRBase:MI0003653	19p13.2	microRNA 638	ncRNA
693158	MIR573	MIRN573|hsa-mir-573|mir-573	HGNC:HGNC:32829|Ensembl:ENSG00000207697|miRBase:MI0003580	4p15.2	microRNA 573	ncRNA
664616	MIR487B	MIRN487B|mir-487b	MIM:615037|HGNC:HGNC:32533|Ensembl:ENSG00000207754|miRBase:MI0003530	14q32.31	microRNA 487b	ncRNA
594842	HAS2-AS1	HAS2-AS|HAS2AS|HASNT|NCRNA00077	MIM:614353|HGNC:HGNC:34340	8q24.13	HAS2 antisense RNA 1	ncRNA
574495	MIR522	MIRN522|hsa-mir-522|mir-522	HGNC:HGNC:32127|Ensembl:ENSG00000283685|miRBase:MI0003177	19q13.42	microRNA 522	ncRNA
574492	MIR517C	MIRN517C	HGNC:HGNC:32124|Ensembl:ENSG00000207838|miRBase:MI0003174	19q13.42	microRNA 517c	ncRNA
574484	MIR520G	MIRN520G|mir-520g	MIM:616272|HGNC:HGNC:32116|Ensembl:ENSG00000207799|miRBase:MI0003166	19q13.42	microRNA 520g	ncRNA
574412	MIR452	MIRN452|hsa-mir-452|mir-452	HGNC:HGNC:32054|Ensembl:ENSG00000283751|miRBase:MI0001733	Xq28	microRNA 452	ncRNA
554213	MIR449A	MIRN449|MIRN449A|hsa-mir-449|mir-449a	MIM:613131|HGNC:HGNC:27645|Ensembl:ENSG00000198983|miRBase:MI0001648	5q11.2	microRNA 449a	ncRNA
494336	MIR424	MIR322|MIRN424|hsa-mir-424|miRNA424|mir-424	MIM:300682|HGNC:HGNC:31881|Ensembl:ENSG00000284231|miRBase:MI0001446	Xq26.3	microRNA 424	ncRNA
494331	MIR382	MIRN382|hsa-mir-382|mir-382	HGNC:HGNC:31875|Ensembl:ENSG00000283170|miRBase:MI0000790	14q32.31	microRNA 382	ncRNA
494330	MIR381	MIRN381|hsa-mir-381|mir-381	HGNC:HGNC:31874|Ensembl:ENSG00000199020|miRBase:MI0000789	14q32.31	microRNA 381	ncRNA
442910	MIR345	MIRN345|hsa-mir-345|mir-345	HGNC:HGNC:31779|Ensembl:ENSG00000198984|miRBase:MI0000825	14q32.2	microRNA 345	ncRNA
442903	MIR331	MIRN331|hsa-mir-331|mir-331	HGNC:HGNC:31772|Ensembl:ENSG00000199172|miRBase:MI0000812	12q22	microRNA 331	ncRNA
442900	MIR326	MIRN326|hsa-mir-326|mir-326	MIM:613755|HGNC:HGNC:31769|Ensembl:ENSG00000199090|miRBase:MI0000808	11q13.4	microRNA 326	ncRNA
407043	MIR7-1	MIRN7-1|hsa-mir-7-1|mir-7-1	MIM:615239|HGNC:HGNC:31638|Ensembl:ENSG00000284179|miRBase:MI0000263	9q21.32	microRNA 7-1	ncRNA
407034	MIR30E	MIRN30E|mir-30e	HGNC:HGNC:31629|Ensembl:ENSG00000198974|miRBase:MI0000749	1p34.2	microRNA 30e	ncRNA
407030	MIR30B	MIRN30B|mir-30b	HGNC:HGNC:31625|Ensembl:ENSG00000207582|miRBase:MI0000441	8q24.22	microRNA 30b	ncRNA
407028	MIR302A	MIRN302|MIRN302A|hsa-mir-302|mir-302a	MIM:614596|HGNC:HGNC:31623|Ensembl:ENSG00000207927|miRBase:MI0000738	4q25	microRNA 302a	ncRNA
407021	MIR29A	MIRN29|MIRN29A|hsa-mir-29|hsa-mir-29a|miRNA29A|mir-29a	MIM:610782|HGNC:HGNC:31616|Ensembl:ENSG00000284032|miRBase:MI0000087	7q32.3	microRNA 29a	ncRNA
407016	MIR26A2	MIRN26A2|mir-26a-2	MIM:613057|HGNC:HGNC:31611|Ensembl:ENSG00000207789|miRBase:MI0000750	12q14.1	microRNA 26a-2	ncRNA
407014	MIR25	MIRN25|hsa-mir-25|miR-25	MIM:612150|HGNC:HGNC:31609|Ensembl:ENSG00000207547|miRBase:MI0000082	7q22.1	microRNA 25	ncRNA
407013	MIR24-2	MIRN24-2|miR-24-2|miRNA24-2	MIM:610724|HGNC:HGNC:31608|Ensembl:ENSG00000284387|miRBase:MI0000081	19p13.12	microRNA 24-2	ncRNA
407011	MIR23B	MIRN23B|hsa-mir-23b|miRNA23B|mir-23b	MIM:610723|HGNC:HGNC:31606|Ensembl:ENSG00000207563|miRBase:MI0000439	9q22.32	microRNA 23b	ncRNA
406999	MIR217	MIRN217|mir-217	MIM:615096|HGNC:HGNC:31594|Ensembl:ENSG00000207548|miRBase:MI0000293	2p16.1	microRNA 217	ncRNA
406998	MIR216A	MIR216|MIRN216|MIRN216A|miRNA216|mir-216|mir-216a	MIM:610944|HGNC:HGNC:31593|Ensembl:ENSG00000207798|miRBase:MI0000292	2p16.1	microRNA 216a	ncRNA
406993	MIR211	MIRN211|mir-211	MIM:613753|HGNC:HGNC:31588|Ensembl:ENSG00000207702|miRBase:MI0000287	15q13.3	microRNA 211	ncRNA
406990	MIR208A	MIR208|MIRN208|MIRN208A|hsa-mir-208a|miRNA208	MIM:611116|HGNC:HGNC:31585|Ensembl:ENSG00000199157|miRBase:MI0000251	14q11.2	microRNA 208a	ncRNA
406977	MIR199A2	MIR-199-s|MIRN199A2|mir-199a-2	MIM:610720|HGNC:HGNC:31572|Ensembl:ENSG00000208024|miRBase:MI0000281	1q24.3	microRNA 199a-2	ncRNA
406965	MIR190A	MIR190|MIRN190|hsa-mir-190a|miR-190|mir-190a	MIM:615845|HGNC:HGNC:31560|Ensembl:ENSG00000211137|miRBase:MI0000486	15q22.2	microRNA 190a	ncRNA
406955	MIR181B1	MIRN181B1|mir-181b-1	MIM:612744|HGNC:HGNC:31550|Ensembl:ENSG00000207975|miRBase:MI0000270	1q32.1	microRNA 181b-1	ncRNA
406945	MIR153-2	MIRN153-2|mir-153-2	HGNC:HGNC:31540|Ensembl:ENSG00000207960|miRBase:MI0000464	7q36.3	microRNA 153-2	ncRNA
406943	MIR152	MIRN152|mir-152	MIM:613788|HGNC:HGNC:31538|Ensembl:ENSG00000207947|miRBase:MI0000462	17q21.32	microRNA 152	ncRNA
406941	MIR149	MIRN149|mir-149	MIM:615209|HGNC:HGNC:31536|Ensembl:ENSG00000207611|miRBase:MI0000478	2q37.3	microRNA 149	ncRNA
406936	MIR144	MIRN144|mir-144	MIM:612070|HGNC:HGNC:31531|Ensembl:ENSG00000283819|miRBase:MI0000460	17q11.2	microRNA 144	ncRNA
406927	MIR136	MIRN136|miRNA136|mir-136	MIM:611710|HGNC:HGNC:31522|Ensembl:ENSG00000207942|miRBase:MI0000475	14q32.2	microRNA 136	ncRNA
406917	MIR129-1	MIR-129b|MIRN129-1|mir-129-1	HGNC:HGNC:31512|Ensembl:ENSG00000207705|miRBase:MI0000252	7q32.1	microRNA 129-1	ncRNA
406911	MIR125B1	MIRN125B1|mir-125b-1	MIM:610104|HGNC:HGNC:31506|Ensembl:ENSG00000207971|miRBase:MI0000446	11q24.1	microRNA 125b-1	ncRNA
406890	MIRLET7G	LET7G|MIRNLET7G|hsa-let-7g|let-7g	MIM:612102|HGNC:HGNC:31485|Ensembl:ENSG00000199150|miRBase:MI0000433	3p21.2	microRNA let-7g	ncRNA
406886	MIRLET7D	LET7D|MIRNLET7D|hsa-let-7d|let-7d	MIM:612145|HGNC:HGNC:31481|Ensembl:ENSG00000199133|miRBase:MI0000065	9q22.32	microRNA let-7d	ncRNA
406884	MIRLET7B	LET7B|MIRNLET7B|hsa-let-7b|let-7b	MIM:611249|HGNC:HGNC:31479|Ensembl:ENSG00000284520|miRBase:MI0000063	22q13.31	microRNA let-7b	ncRNA
285194	TUSC7	LINC00902|LSAMP-AS1|LSAMP-AS3|LSAMPAS3|NCRNA00295	MIM:616057|HGNC:HGNC:27701	3q13.31	tumor suppressor candidate 7 (non-protein coding)	ncRNA
220930	ZEB1-AS1	-	MIM:616915|HGNC:HGNC:42354	10p11.22	ZEB1 antisense RNA 1	ncRNA
196475	RMST	LINC00054|NCRMS|NCRNA00054	MIM:607045|HGNC:HGNC:29893|Ensembl:ENSG00000255794	12q23.1|12q21	rhabdomyosarcoma 2 associated transcript (non-protein coding)	ncRNA
101927574	LINC01186	-	HGNC:HGNC:49573|Ensembl:ENSG00000236751	Xp11.3	long intergenic non-protein coding RNA 1186	ncRNA
100302213	MIR1181	MIRN1181|hsa-mir-1181	HGNC:HGNC:35262|Ensembl:ENSG00000284268|miRBase:MI0006274	19p13.2	microRNA 1181	ncRNA
100130155	MIR124-2HG	LINC00966	HGNC:HGNC:48723|Ensembl:ENSG00000254377	8q12.3	MIR124-2 host gene	ncRNA
100126309	MIR875	MIRN875|hsa-mir-875	HGNC:HGNC:33652|Ensembl:ENSG00000216069|miRBase:MI0005541	8q22.2	microRNA 875	ncRNA
100126306	MIR888	MIRN888|hsa-mir-888	HGNC:HGNC:33648|Ensembl:ENSG00000216005|miRBase:MI0005537	Xq27.3	microRNA 888	ncRNA
