# Supplementary material for: FOXQ1 promotes pancreatic cancer cell proliferation, tumor stemness, invasion and metastasis through regulation of LDHA-mediated aerobic glycolysis
Source: Research Square preprint supplement (doi:10.21203/rs.3.rs-3065885/v1), 2023-07-12
Supplement: Supplementary file 2 [file fc57ddbaca4b04d6177a294e.docx]

**Supplementary figure legends**

**Supplementary Fig.S1: Bioinformatics prediction results.**

Screening of PC tissues for the EMT-related differentially expressed transcription factor FOXQ1 by public databases. EMT-related gene sets were retrieved from the GSEA database and analyzed with TCGA database.

**Supplementary Fig.S2: Stable FOXQ1 knockdown cell lines in PANC-1 and CFPAC-1 cells.**

**A** RT-qPCR analysis of FOXQ1 mRNA expression in PANC-1 and CFPAC-1 cell groups. **B** Western blot analysis of FOXQ1 expression in PANC-1 and CFPAC-1 cell groups.

**Supplementary Fig.S3: FOXQ1 promotes PC cells invasion and metastasis in vitro.**

Immunofluorescence assay was performed to detect EMT-related protein expression in CFPAC-1 cell groups. Scale bar: 100 µm; *p < 0.05; **p < 0.01.

**Supplementary Fig.S4:** **Correlation analysis by GEPIA database.**

**A** Correlation analysis of ALDH3A2 and FOXQ1 in PC using the GEPIA database. **B** Correlation analysis of DLAT and FOXQ1 in PC using the GEPIA database.
